# Supplementary material for: Rh-catalyzed asymmetric allylation of tert-butanesulfinamide
Source: Royal Society of Chemistry journal article supplement (doi:10.1039/d4qo00986j), 2024-01-01
Supplement: d4qo00986j1.pdf [file d4qo00986j1.pdf]

## Supporting Information

### Rh-Catalyzed Asymmetric Allylation of tert-Butanesulfinamide

Min Liu, Changkun Li\*

Shanghai Key Laboratory for Molecular Engineering of Chiral Drugs, School of Chemistry and  
Chemical Engineering, Shanghai Jiao Tong University, 800 Dongchuan Road, Shanghai 200240, China

### Table of Contents

|                                                                      |    |
|----------------------------------------------------------------------|----|
| 1. General information.....                                          | 2  |
| 2. Substrate list.....                                               | 3  |
| 3. Optimization of reaction conditions. ....                         | 4  |
| 4. Procedure for ligand synthesis. ....                              | 7  |
| 5. General procedure for Rh(I)-catalyzed asymmetric allylation. .... | 15 |
| 6. Analytic data for new products.....                               | 16 |
| 7. Stereodivergent synthesis of all four stereoisomers. ....         | 22 |
| 8. Synthetic applications.....                                       | 23 |
| 9. The inhibition effect of allylic tert-butanesulfinamide.....      | 27 |
| 10. Single crystal X-ray diffraction data.....                       | 28 |
| 11. NMR spectra of new compounds.....                                | 30 |
| 12. References.....                                                  | 55 |

## 1. General information.

Air and moisture sensitive reactions were carried out in oven-dried glassware sealed with rubber septa under dry argon atmosphere. All reagents were purchased from commercial suppliers without further purification. Solvent purification was conducted by solvent purification system (Vigor YJC-7). Column chromatography was performed using 200-300 mesh silica gels. The NMR spectra were recorded on a Varian MERCURY plus-400 (400 MHz,  $^1\text{H}$ ; 101 MHz,  $^{13}\text{C}$ ); Bruker-400 instrument (400 MHz,  $^1\text{H}$ ; 101 MHz,  $^{13}\text{C}$ ); Bruker-500 instrument (500 MHz,  $^1\text{H}$ ; 126 MHz,  $^{13}\text{C}$ ), spectrometer with chemical shifts reported in ppm relative to the residual deuterated solvent and the internal standard tetramethylsilane.  $^{19}\text{F}$  NMR spectra were recorded on a Bruker-400 (376 MHz, respectively) and referenced relative to  $\text{PhCF}_3$ . Data for  $^1\text{H}$  NMR are recorded as follows: chemical shift ( $\delta$ , ppm), multiplicity (s = singlet, d = doublet, t = triplet, q = quartet, m = multiplet or unresolved, br = broad singlet, coupling constant(s) in Hz, integration). XRD and High-resolution mass spectra (HRMS) were performed at Instrumental Analysis Center of Shanghai Jiao Tong University with electrospray spectrometer Waters Micromass Q-TOF Premier Mass Spectrometer. The *ee* values were determined by HPLC using a Daicel chiral column. Melting points were measured with Hanon MP100 melting point apparatus. Optical rotations were measured on an Anton Paar MCP100 automatic polarimeter using a 100 mm path-length cell at 589 nm.

## 2. Substrate list.

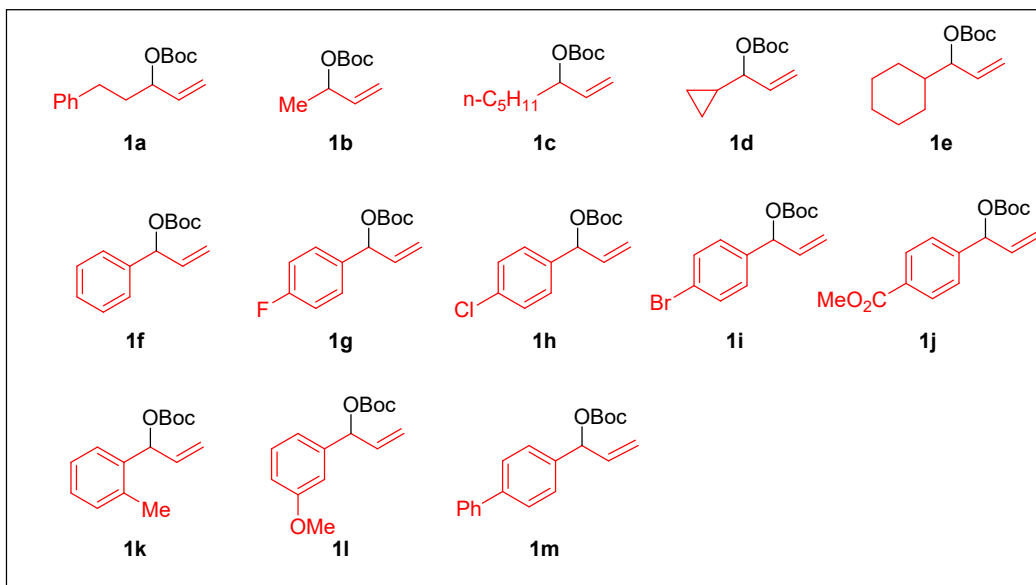

1a-1f<sup>1</sup>, 1g-1k, 1m<sup>2</sup>, 1l<sup>3</sup> were prepared according to the literature.

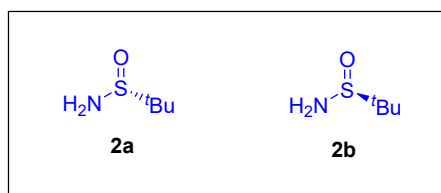

The substrates **2a** and **2b** were purchased from Shanghai Bidepharmatech Co., Ltd.

### 3. Optimization of reaction conditions.

Table S1. Solvent screening

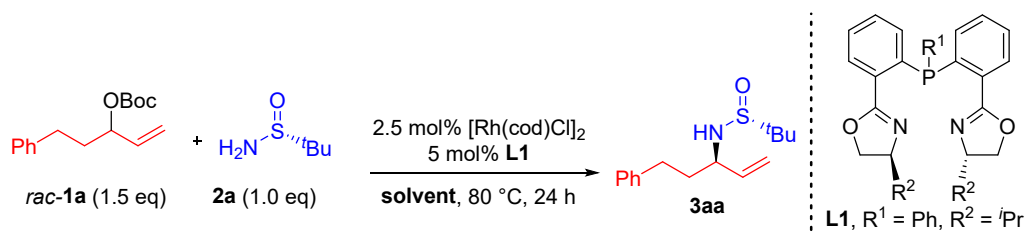

| entry | solvent            | yield of <b>3aa</b> (%) | <i>dr</i> of <b>3aa</b> | <i>b/l</i> |
|-------|--------------------|-------------------------|-------------------------|------------|
| 1     | toluene            | 49                      | >20/1                   | 2.5/1      |
| 2     | THF                | 47                      | >20/1                   | 4.2/1      |
| 3     | 1,4-Dioxane        | 45                      | >20/1                   | 3.5/1      |
| 4     | CH <sub>3</sub> CN | <5                      | -                       | -          |
| 5     | DMF                | NR                      | -                       | -          |
| 6     | DCE                | <5                      | -                       | -          |

**Table S2. Ligands screening of synthesis of 3aa**

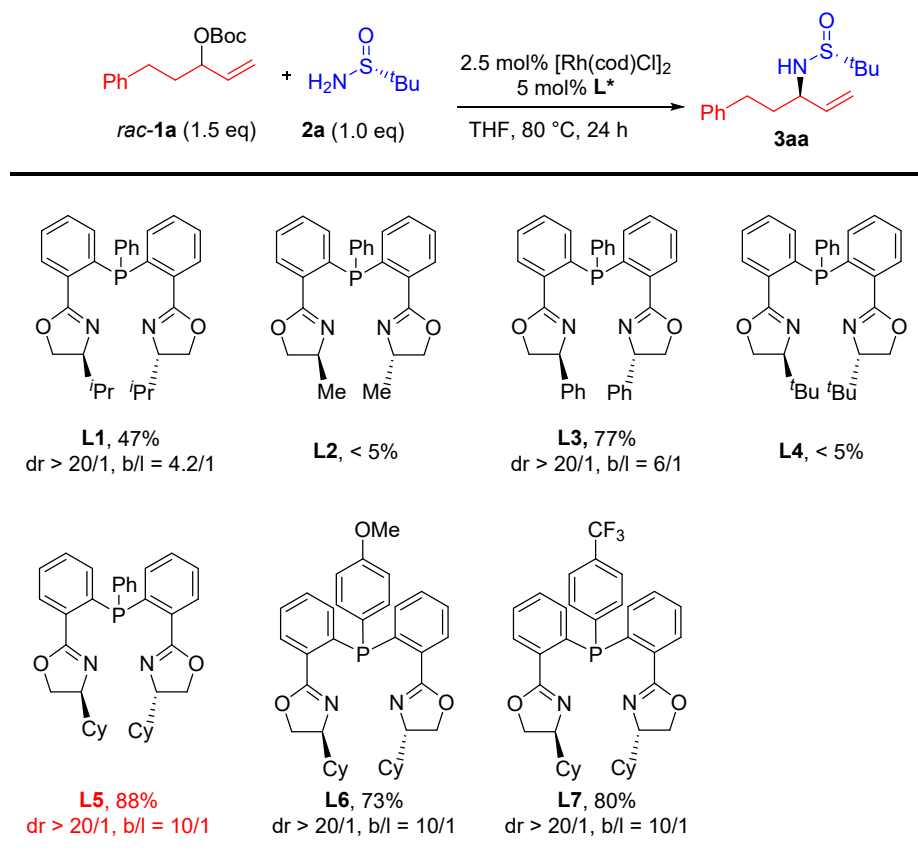

**Table S3. Ligands screening of synthesis of 4ab**

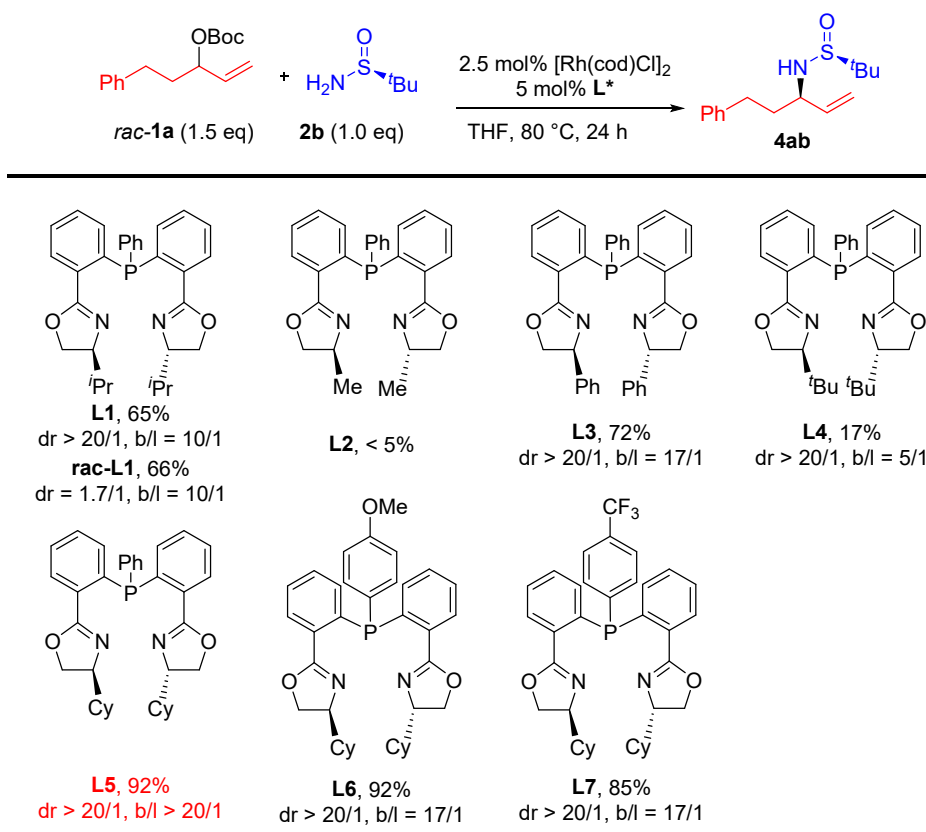

#### 4. Procedure for ligand synthesis.

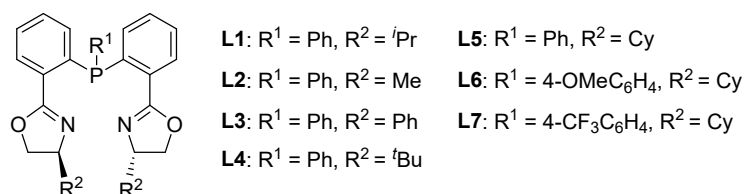

**L1-L4** were synthesized according to the reported literature<sup>4</sup>.

**L5** and (*ent*)-**L5** were synthesized according to the **Method 1**.

**L6** and **L7** were synthesized according to the **Method 2**.

#### Method 1:

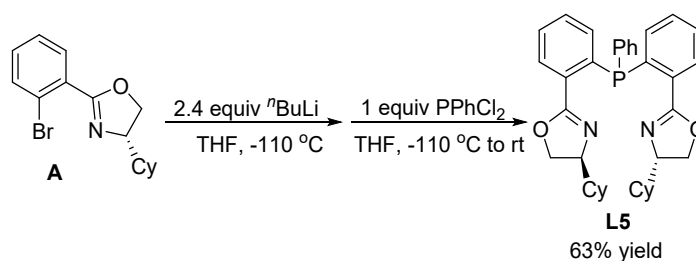

In a flame dried Shlenk tube, compound **A** (4.4 mmol, 2.2 eq) was dissolved in THF (18 mL) under an argon atmosphere and cooled down to -110 °C. *n*-BuLi (2.4 eq, 2.5 M in THF) was added dropwise and the mixture was stirred for 1 h at this temperature. Then phenylphosphine dichloride (2.0 mmol, 1.0 eq) in 1 mL of THF was added slowly. The reaction mixture was stirred at -110 °C for one hour and warmed to room temperature. After 12 hours, the reaction mixture was quenched with water and extracted with ethyl acetate. Organic phase was washed with brine and dried over Na<sub>2</sub>SO<sub>4</sub>. Solvent was removed under reduced pressure and crude product was purified by flash column chromatography on silica gel using petroleum ether/ethyl acetate as eluent to obtain the pure product **L5**.

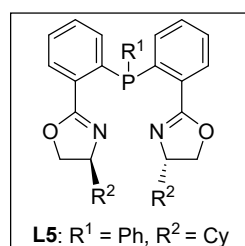

710 mg, 63%, yellow oil, R<sub>f</sub> = 0.5 (PE/EA = 5/1),  $[\alpha]_D^{25} = -31.2$  (*c* = 0.5, CHCl<sub>3</sub>).

**<sup>1</sup>H NMR** (400 MHz, CDCl<sub>3</sub>) δ 7.90 – 7.85 (m, 2H), 7.35 – 7.26 (m, 7H), 7.26 – 7.20 (m, 2H), 6.95 – 6.93 (m, 1H), 6.89 – 6.87 (m, 1H), 4.19 – 4.06 (m, 2H), 3.95 – 3.73 (m, 4H), 1.63 – 1.53 (m, 8H), 1.34 – 1.28 (m, 2H), 1.14 – 1.02 (m,

8H), 0.87 – 0.64 (m, 4H).

**<sup>13</sup>C NMR** (101 MHz, CDCl<sub>3</sub>) δ 162.9 (d, *J* = 2.0 Hz), 162.6 (d, *J* = 2.3 Hz), 140.5 (d, *J* = 28.4 Hz), 139.9 (d, *J* = 22.5 Hz), 139.1 (d, *J* = 13.6 Hz), 134.5, 134.4 (d, *J* = 12.6 Hz), 133.8, 132.1 (d, *J* = 20.1 Hz),

131.9 (d,  $J = 20.5$  Hz), 130.1 (d,  $J = 17.1$  Hz), 129.6 (d,  $J = 3.7$  Hz), 129.5, 128.2 (d,  $J = 7.1$  Hz), 127.6 (d,  $J = 8.8$  Hz), 72.1, 71.9, 70.0, 70.0, 42.7, 42.6, 29.1, 29.0, 28.9, 28.8, 26.4, 26.4, 26.1, 26.0, 25.9.

$^{31}\text{P}$  NMR (162 MHz,  $\text{CDCl}_3$ )  $\delta$  -6.6.

HRMS (ESI):  $m/z$  calculated for  $\text{C}_{36}\text{H}_{42}\text{N}_2\text{O}_2\text{P}$   $[\text{M} + \text{H}]^+ = 565.2978$ ; found 565.2967.

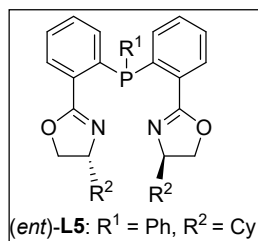

620 mg, 55%, yellow solid,  $R_f = 0.5$  (PE/EA = 5/1),  $[\alpha]_D^{25} = +33.6$  ( $c = 0.25$ ,  $\text{CHCl}_3$ ). m.p. = 70.0-71.8 °C.

$^1\text{H}$  NMR (400 MHz,  $\text{CDCl}_3$ )  $\delta$  7.88 – 7.86 (m, 2H), 7.35 – 7.20 (m, 9H), 6.95 – 6.92 (m, 1H), 6.89 – 6.87 (m, 1H), 4.22 – 4.10 (m, 2H), 3.99 – 3.79 (m, 4H), 1.63 – 1.54 (m, 8H), 1.34 – 1.31 (m, 2H), 1.19 – 0.98 (m, 8H), 0.78 –

0.70 (m, 4H).

$^{13}\text{C}$  NMR (101 MHz,  $\text{CDCl}_3$ )  $\delta$  162.9 (d,  $J = 2.1$  Hz), 162.6 (d,  $J = 2.2$  Hz), 140.5 (d,  $J = 28.6$  Hz), 139.9 (d,  $J = 22.5$  Hz), 139.1 (d,  $J = 13.7$  Hz), 134.5, 134.4 (d,  $J = 12.7$  Hz), 133.8, 132.1 (d,  $J = 20.2$  Hz), 131.9 (d,  $J = 20.3$  Hz), 130.1 (d,  $J = 17.1$  Hz), 129.6 (d,  $J = 3.7$  Hz), 129.5, 128.2 (d,  $J = 7.0$  Hz), 127.6 (d,  $J = 8.9$  Hz), 72.1, 71.9, 70.0, 70.0, 42.7, 42.6, 29.1, 29.0, 28.9, 28.8, 26.4, 26.4, 26.1, 26.0, 25.9.

$^{31}\text{P}$  NMR (162 MHz,  $\text{CDCl}_3$ )  $\delta$  -6.6.

HRMS (ESI):  $m/z$  calculated for  $\text{C}_{36}\text{H}_{42}\text{N}_2\text{O}_2\text{P}$   $[\text{M} + \text{H}]^+ = 565.2978$ ; found 565.2969.

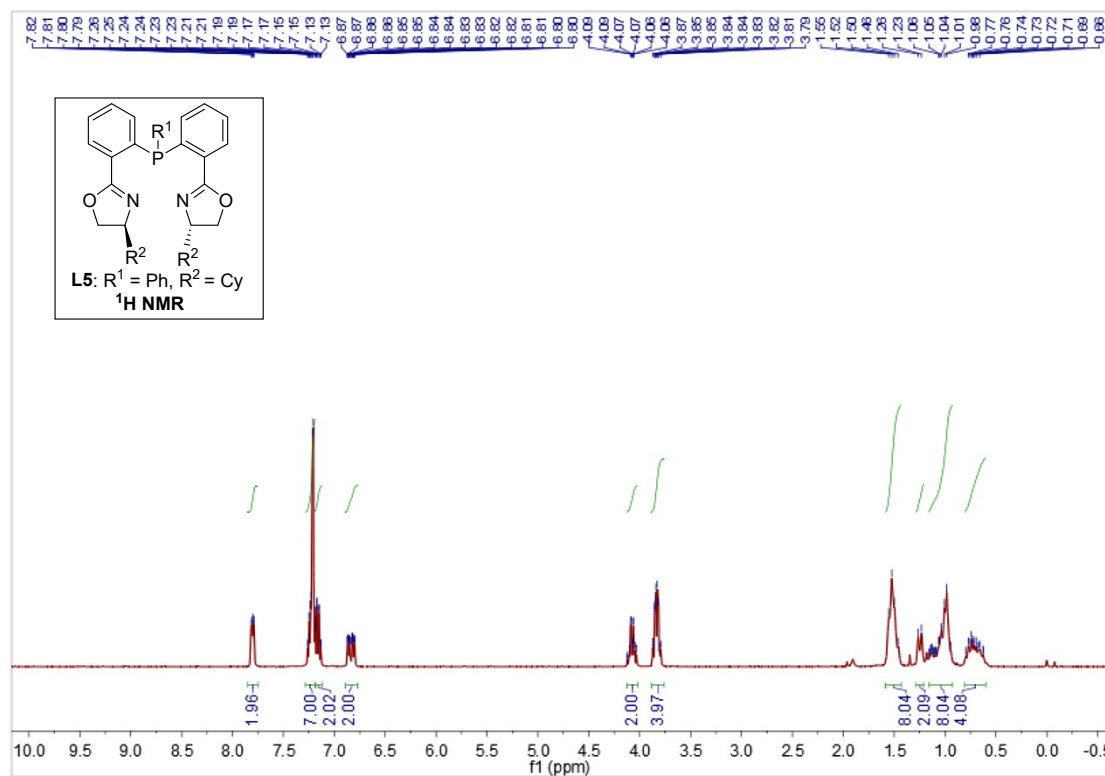



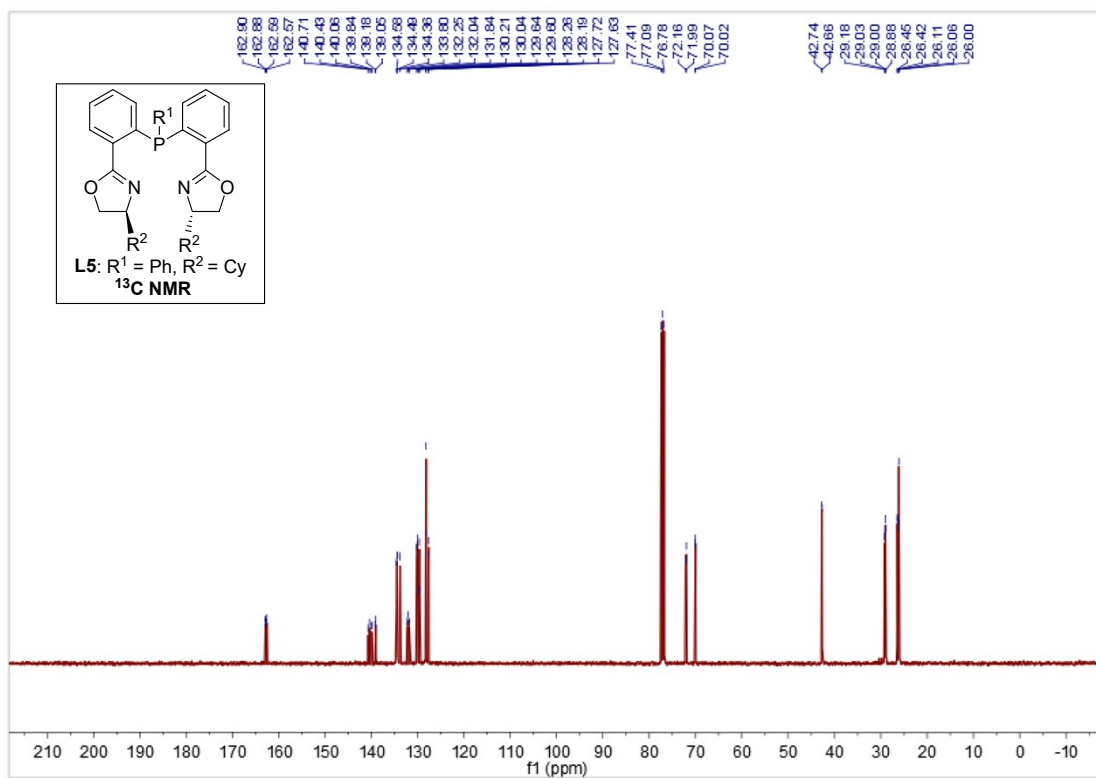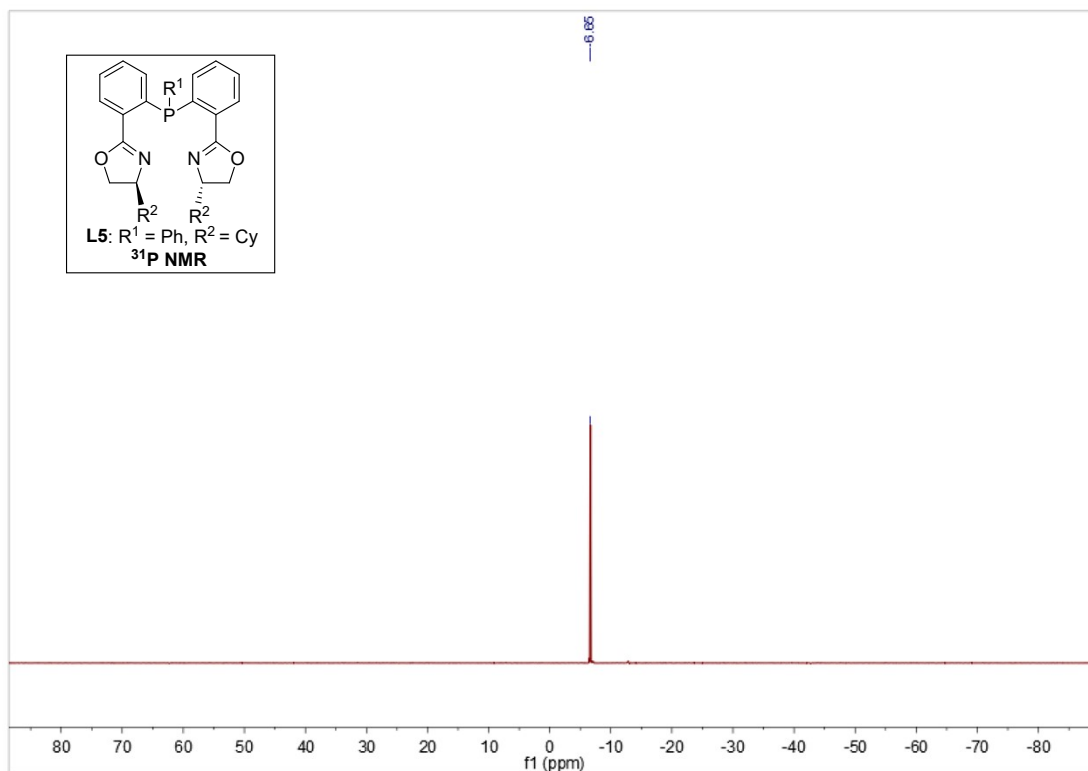

## Method 2:

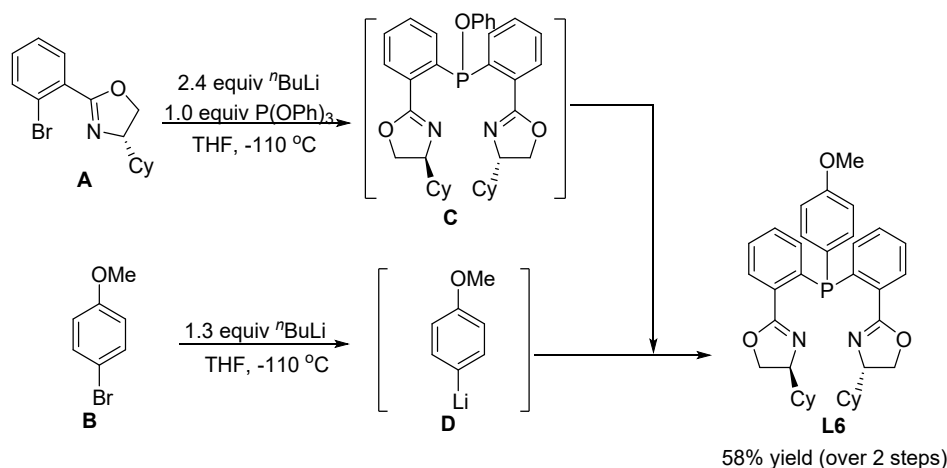

In a flame dried Shlenk tube, compound **A** (4.4 mmol, 2.2 eq) was dissolved in THF solvent (16 mL) under an argon atmosphere and cooled down to  $-110\text{ }^\circ\text{C}$ .  $n\text{BuLi}$  (2.4 eq, 2.5 M in THF) was added dropwise and the mixture was stirred for 1 h at this temperature. The reaction mixture was added triphenylphosphite (2.0 mmol, 1.0 eq) in 2.0 mL of THF in one portion under vigorous stirring. The reaction was slowly warmed up to room temperature and stirred for 5 hours. Phosphinite reaction mixture **C** was used in situ for further substitution to get the desired ligand.

In another flame dried Shlenk tube, lithiation of the substituted benzene was carried out from their corresponding 1-bromo-4-methoxybenzene **B** (2.0 mmol, 1.0 eq) using  $n\text{BuLi}$  (1.3 eq) at  $-110\text{ }^\circ\text{C}$ . Then the reaction mixture was added to the phosphinite solution **C** via syringe over 10 minutes. Combined reaction mixture was allowed to warm to room temperature slowly and stirred overnight. The reaction mixture was quenched with water and extracted with ethyl acetate. The solvent was removed and the residue was purified by flash column chromatography on silica gel using petroleum ether/ethyl acetate as eluent to obtain the pure product.

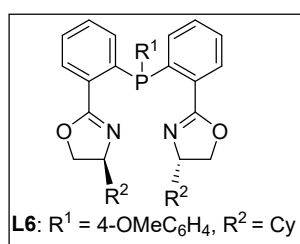

689 mg, 58%, yellow oil,  $R_f = 0.5$  (PE/EA = 5/1),  $[\alpha]_D^{25} = -22.8$  ( $c = 0.5$ ,  $\text{CHCl}_3$ ).

$^1\text{H NMR}$  (400 MHz,  $\text{CDCl}_3$ )  $\delta$  7.88 – 7.86 (m, 2H), 7.34 – 7.20 (m, 6H), 6.97 – 6.90 (m, 2H), 6.86 – 6.84 (m, 2H), 4.20 – 4.09 (m, 2H), 3.94 – 3.83 (m, 4H), 3.79 (s, 3H), 1.69 – 1.54 (m, 8H), 1.35 – 1.32 (m, 2H), 1.17

– 1.00 (m, 8H), 0.91 – 0.68 (m, 4H).

$^{13}\text{C NMR}$  (101 MHz,  $\text{CDCl}_3$ )  $\delta$  163.0 (d,  $J = 2.2$  Hz), 162.7 (d,  $J = 2.5$  Hz), 159.9, 140.9 (d,  $J = 27.8$  Hz), 140.4 (d,  $J = 22.2$  Hz), 136.2, 136.0, 134.2, 133.5, 132.0 (d,  $J = 18.8$  Hz), 131.8 (d,  $J = 19.4$  Hz), 130.0 (d,  $J = 15.0$  Hz), 129.6 (d,  $J = 4.2$  Hz), 129.6 (d,  $J = 2.8$  Hz), 129.5, 127.5 (d,  $J = 7.3$  Hz), 113.9 (d,  $J = 8.5$  Hz), 72.1, 71.9, 70.0, 70.0, 55.0, 42.7, 42.6, 29.2, 29.0, 28.9, 28.8, 26.4, 26.4, 26.1, 26.0, 26.0.

<sup>31</sup>P NMR (162 MHz, CDCl<sub>3</sub>) δ -8.0.

HRMS (ESI): *m/z* calculated for C<sub>37</sub>H<sub>44</sub>N<sub>2</sub>O<sub>3</sub>P [M + H]<sup>+</sup> = 595.3084; found 595.3075.

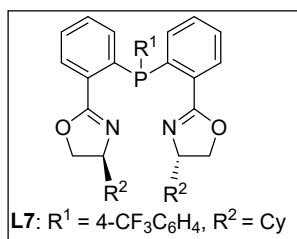

750 mg, 60%, yellow solid, R<sub>f</sub> = 0.5 (PE/EA = 5/1), [α]<sub>D</sub><sup>25</sup> = -10.4 (c = 0.25, CHCl<sub>3</sub>). m.p. = 61.6-63.2 °C.

<sup>1</sup>H NMR (400 MHz, CDCl<sub>3</sub>) δ 7.95 – 7.87 (m, 2H), 7.53 – 7.51 (m, 2H), 7.40 – 7.32 (m, 4H), 7.27 – 7.23 (m, 2H), 6.93 – 6.90 (m, 1H), 6.86 – 6.79 (m, 1H), 4.23 – 4.14 (m, 2H), 4.00 – 3.83 (m, 4H), 1.58 –

1.56 (m, 6H), 1.48 – 1.45 (m, 2H), 1.33 – 1.20 (m, 2H), 1.15 – 0.98 (m, 8H), 0.83 – 0.73 (m, 2H), 0.70 – 0.57 (m, 2H).

<sup>13</sup>C NMR (101 MHz, CDCl<sub>3</sub>) δ 162.2 (d, *J* = 2.5 Hz), 162.0 (d, *J* = 3.2 Hz), 145.3 (d, *J* = 17.5 Hz), 139.9 (d, *J* = 29.2 Hz), 139.2 (d, *J* = 21.2 Hz), 134.6, 134.4, 134.2, 133.8, 132.0 (d, *J* = 21.0 Hz), 131.8 (d, *J* = 21.9 Hz), 130.2 (d, *J* = 18.3 Hz), 129.8 (d, *J* = 32.2 Hz), 129.6 (d, *J* = 2.5 Hz), 129.5 (d, *J* = 4.0 Hz), 128.0 (d, *J* = 8.9 Hz), 124.7 (q, *J* = 3.6 Hz), 124.3 (d, *J* = 272.3 Hz), 72.2, 72.1, 70.0, 70.0, 42.8, 42.6, 29.0, 28.9, 28.9, 28.8, 26.3, 26.3, 26.0, 26.0, 25.9.

<sup>31</sup>P NMR (162 MHz, CDCl<sub>3</sub>) δ -7.6.

<sup>19</sup>F NMR (377 MHz, CDCl<sub>3</sub>) δ -62.5.

HRMS (ESI): *m/z* calculated for C<sub>37</sub>H<sub>41</sub>F<sub>3</sub>N<sub>2</sub>O<sub>2</sub>P [M + H]<sup>+</sup> = 633.2852; found 633.2844.

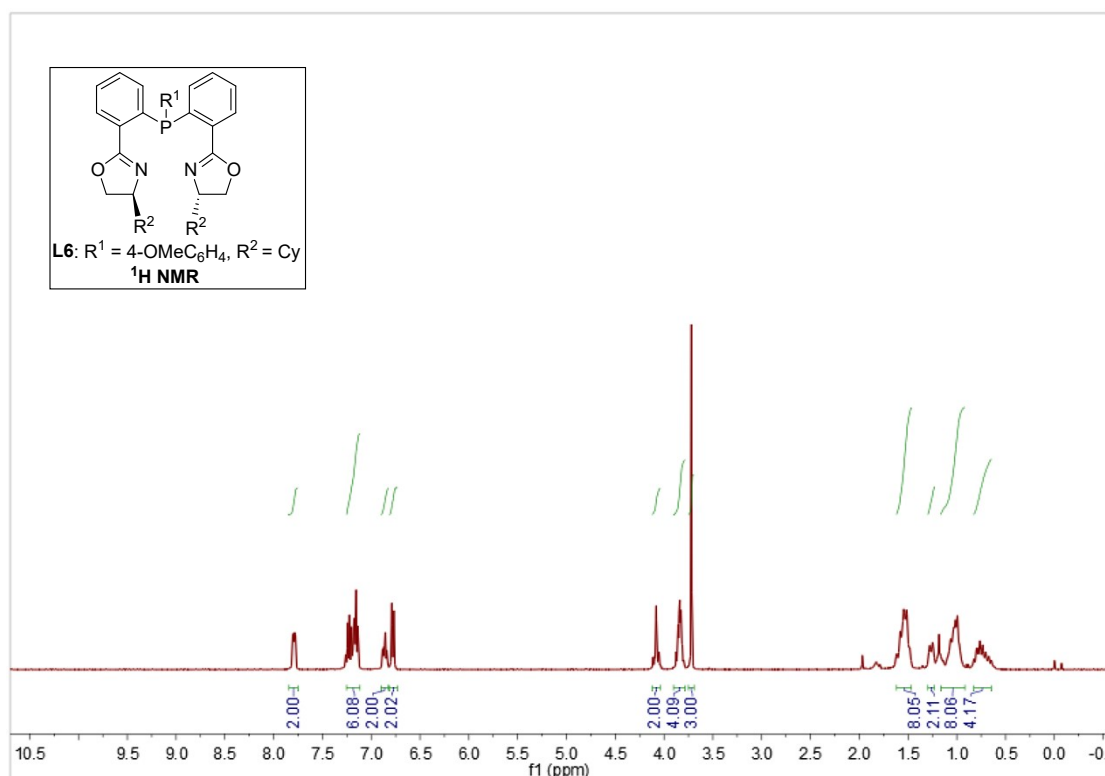

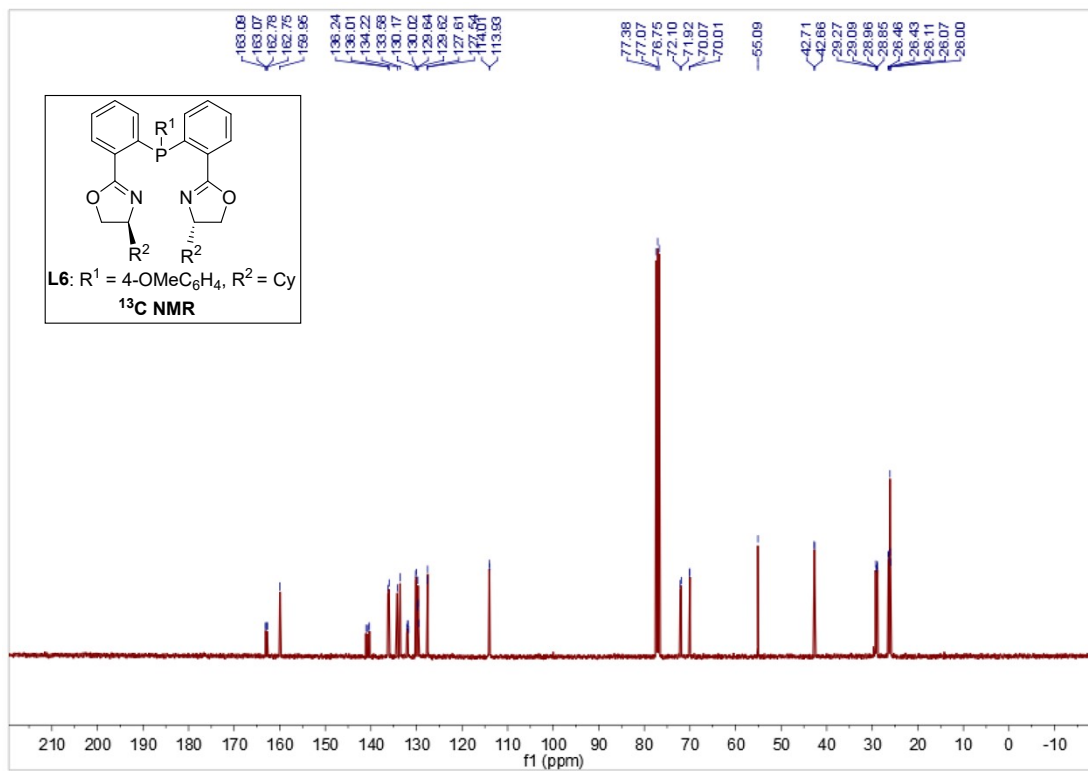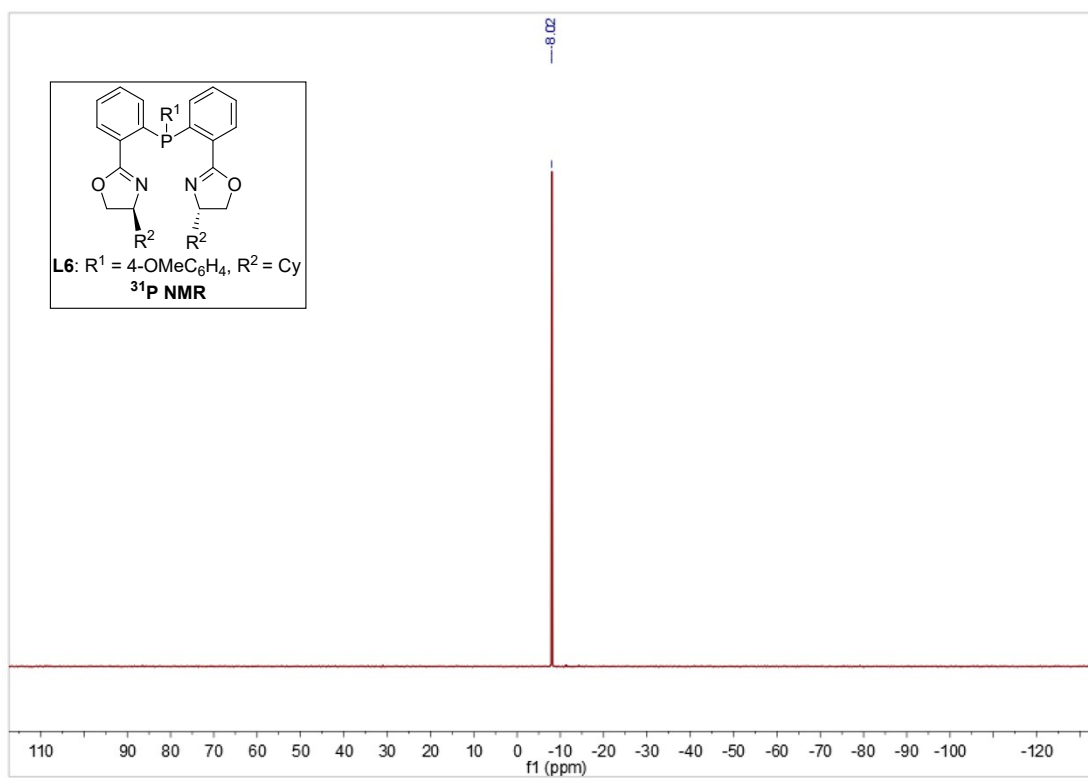

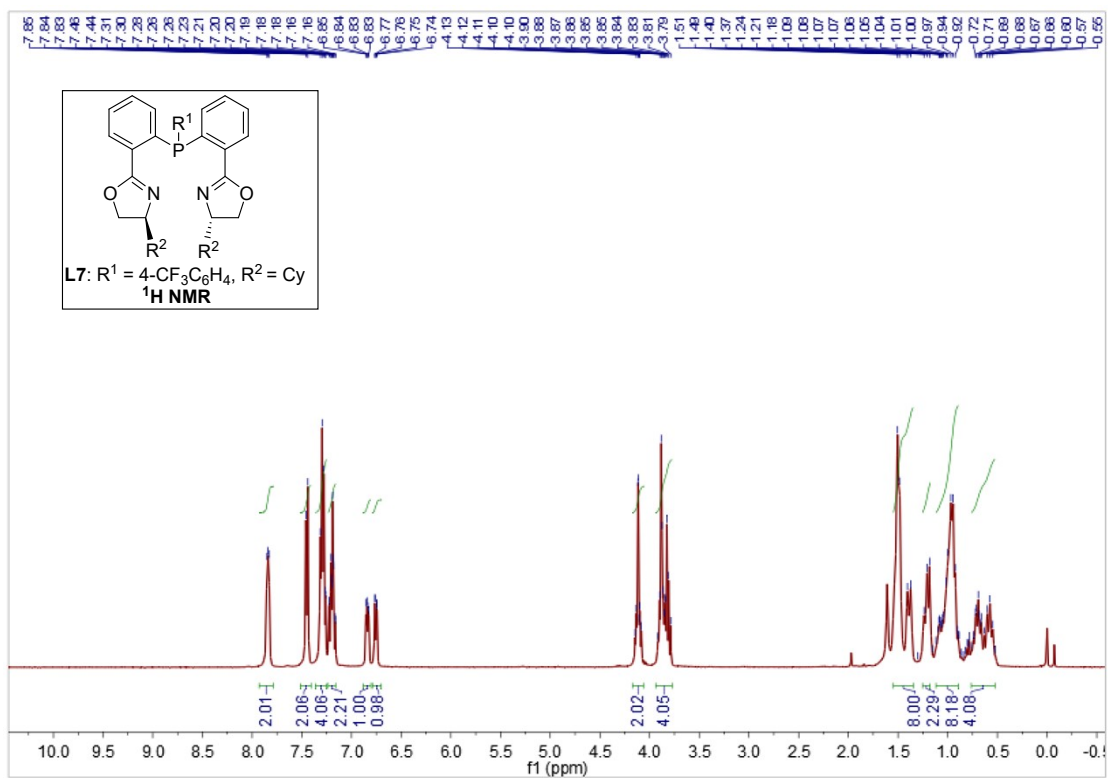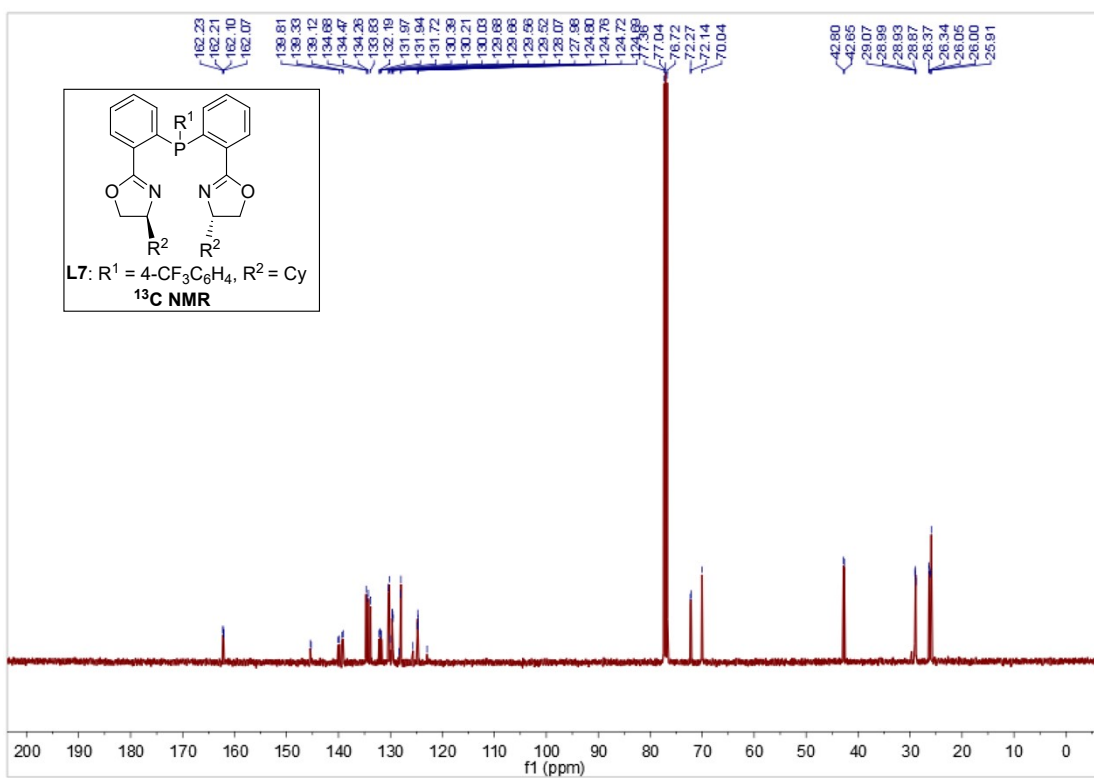

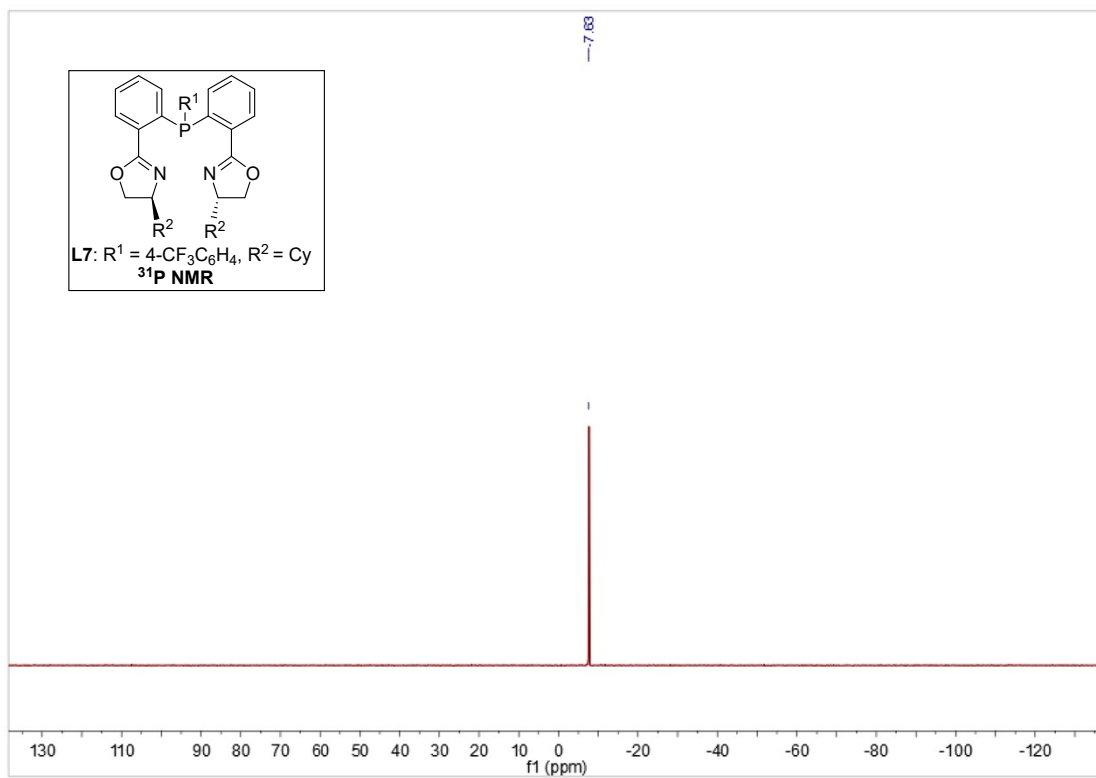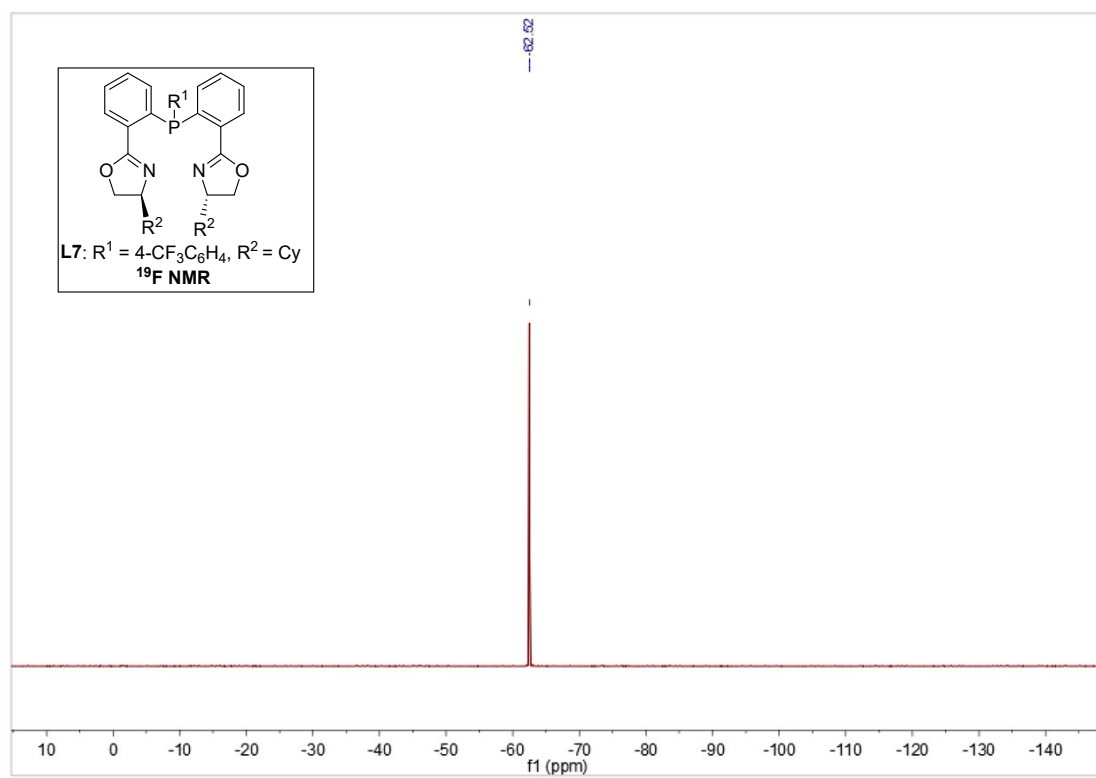

## 5. General procedure for Rh(I)-catalyzed asymmetric allylation.

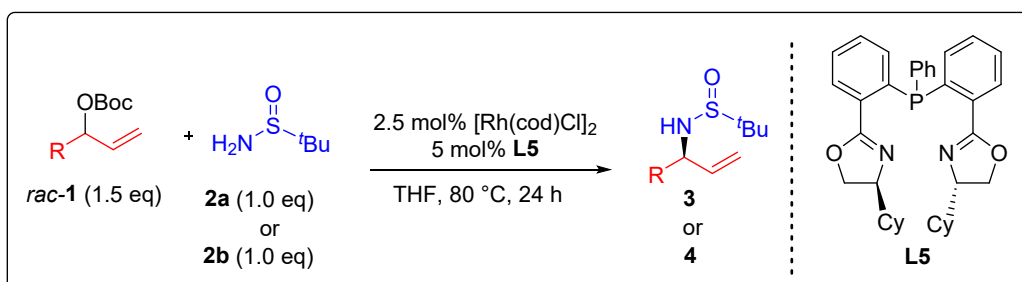

In a  $\text{N}_2$ -filled glovebox, a pressure tube equipped with a magnetic stir bar was charged with  $[\text{Rh}(\text{cod})\text{Cl}]_2$  (2.5 mg, 2.5 mol%), **L5** (5.6 mg, 5.0 mol%), THF (1.0 mL). The reaction mixture was stirred at room temperature for 15 minutes. *rac-1* (0.3 mmol, 1.5 eq) and **2a** or **2b** (24.2 mg, 0.2 mmol, 1.0 eq) were added to the above solution. The tube was tightly capped, transferred out of the glovebox and heated at 80 °C for 24 hours. After cooling down, the crude mixture was concentrated and the residue was purified by column chromatography to get the corresponding product **3** or **4**.

## 6. Analytic data for new products.

### (*R*)-2-Methyl-N-((*R*)-5-phenylpent-1-en-3-yl)propane-2-sulfinamide (3aa)

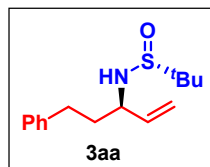

46.5 mg, 88%, colorless oil,  $R_f = 0.4$  (PE/EA = 1/1),  $dr > 20:1$ ,  $b/l = 10:1$ ,  $[\alpha]_D^{25} = -43.2$  ( $c = 0.25$ ,  $\text{CHCl}_3$ ).

$^1\text{H NMR}$  (400 MHz,  $\text{CDCl}_3$ )  $\delta$  7.31 – 7.27 (m, 2H), 7.21 – 7.17 (m, 3H), 5.93 – 5.84 (m, 1H), 5.29 (d,  $J = 17.2$  Hz, 1H), 5.22 (d,  $J = 10.3$  Hz, 1H), 3.84 – 3.75 (m, 1H), 3.16 (d,  $J = 6.1$  Hz, 1H), 2.73 – 2.61 (m, 2H), 2.05 – 1.94 (m, 1H), 1.88 – 1.80 (m, 1H), 1.22 (s, 9H).

$^{13}\text{C NMR}$  (101 MHz,  $\text{CDCl}_3$ )  $\delta$  141.5, 139.5, 128.5, 128.4, 126.0, 117.0, 58.2, 55.8, 37.0, 31.8, 22.6.

**HRMS** (ESI):  $m/z$  calculated for  $\text{C}_{15}\text{H}_{23}\text{NOS}$   $[\text{M} + \text{Na}]^+ = 288.1393$ ; found 288.1390.

### (*R*)-N-((*R*)-but-3-en-2-yl)-2-methylpropane-2-sulfinamide (3ba)

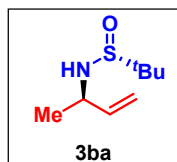

29.1 mg, 83%, colorless oil,  $R_f = 0.3$  (PE/EA = 1/1),  $dr > 20:1$ ,  $b/l > 20:1$ ,  $[\alpha]_D^{25} = -31.4$  ( $c = 0.5$ ,  $\text{CHCl}_3$ ).

$^1\text{H NMR}$  (400 MHz,  $\text{CDCl}_3$ )  $\delta$  5.93 – 5.84 (m, 1H), 5.26 – 5.21 (d,  $J = 16.0$  Hz, 1H), 5.11 (d,  $J = 10.3$ , 1H), 4.01 – 3.85 (m, 1H), 3.18 (d,  $J = 3.6$  Hz, 1H), 1.29 (d,  $J = 6.5$  Hz, 3H), 1.21 (s, 9H).

$^{13}\text{C NMR}$  (101 MHz,  $\text{CDCl}_3$ )  $\delta$  140.9, 115.3, 55.4, 53.3, 22.5, 21.1.

**HRMS** (ESI):  $m/z$  calculated for  $\text{C}_8\text{H}_{17}\text{NOS}$   $[\text{M} + \text{Na}]^+ = 198.0923$ ; found 198.0919.

### (*R*)-2-Methyl-N-((*R*)-oct-1-en-3-yl)propane-2-sulfinamide (3ca)

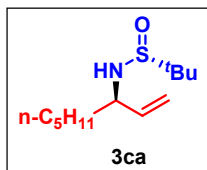

41.3 mg, 90%, colorless oil,  $R_f = 0.4$  (PE/EA = 1/1),  $dr > 20:1$ ,  $b/l = 10:1$ ,  $[\alpha]_D^{25} = -51.6$  ( $c = 0.25$ ,  $\text{CHCl}_3$ ).

$^1\text{H NMR}$  (400 MHz,  $\text{CDCl}_3$ )  $\delta$  5.87 – 5.78 (m, 1H), 5.25 (d,  $J = 17.1$  Hz, 1H), 5.16 (d,  $J = 10.3$  Hz, 1H), 3.76 – 3.71 (m, 1H), 3.09 (d,  $J = 5.6$  Hz, 1H), 1.69 – 1.62 (m, 1H), 1.54 – 1.46 (m, 1H), 1.39 – 1.25 (m, 6H), 1.22 (s, 9H), 0.88 (t,  $J = 6.5$  Hz, 3H).

$^{13}\text{C NMR}$  (101 MHz,  $\text{CDCl}_3$ )  $\delta$  140.0, 116.3, 58.7, 55.7, 35.2, 31.4, 25.1, 22.6, 22.5, 14.0.

**HRMS** (ESI):  $m/z$  calculated for  $\text{C}_{12}\text{H}_{25}\text{NOS}$   $[\text{M} + \text{Na}]^+ = 254.1549$ ; found 254.1544.

### (*R*)-N-((*S*)-1-cyclopropylallyl)-2-methylpropane-2-sulfinamide (3da)

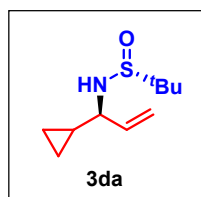

36.0 mg, 90%, yellow oil,  $R_f = 0.4$  (PE/EA = 1/1),  $dr > 20:1$ ,  $b/l > 20:1$ ,  $[\alpha]_D^{25} = -65.6$  ( $c = 0.25$ ,  $\text{CHCl}_3$ ).

$^1\text{H NMR}$  (400 MHz,  $\text{CDCl}_3$ )  $\delta$  5.94 – 5.85 (m, 1H), 5.25 (d,  $J = 17.2$  Hz, 1H), 5.13



(d,  $J = 10.3$  Hz, 1H), 3.30 (d,  $J = 4.4$  Hz, 1H), 3.20 – 3.06 (m, 1H), 1.21 (s, 9H), 0.95 – 0.84 (m, 1H), 0.66 – 0.59 (m, 1H), 0.55 – 0.48 (m, 1H), 0.45 – 0.40 (m, 1H), 0.24 – 0.18 (m, 1H).

$^{13}\text{C}$  NMR (101 MHz,  $\text{CDCl}_3$ )  $\delta$  138.7, 116.1, 62.5, 55.5, 22.5, 15.6, 4.7, 2.4.

HRMS (ESI):  $m/z$  calculated for  $\text{C}_{10}\text{H}_{19}\text{NOS}$   $[\text{M} + \text{Na}]^+ = 224.1080$ ; found 224.1076.

#### (*R*)-*N*-((*S*)-1-cyclohexylallyl)-2-methylpropane-2-sulfinamide (3ea)

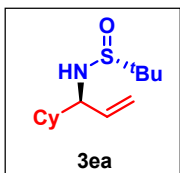

36.9 mg, 76%, yellow oil,  $R_f = 0.4$  (PE/EA = 1/1),  $dr > 20:1$ ,  $b/l = 4:1$ ,  $[\alpha]_D^{25} = -28.3$   
( $c = 0.25$ ,  $\text{CHCl}_3$ ).

$^1\text{H}$  NMR (400 MHz,  $\text{CDCl}_3$ )  $\delta$  5.86 – 5.80 (m, 1H), 5.25 (d,  $J = 1.1$  Hz, 1H), 5.20 (d,  $J = 1.0$  Hz, 1H), 3.57 – 3.52 (m, 1H), 3.08 (d,  $J = 7.4$  Hz, 1H), 1.79 – 1.62 (m, 6H),

1.52 – 1.49 (m, 1H), 1.23 (s, 9H), 1.22 – 1.19 (m, 2H), 1.14 – 1.07 (m, 1H), 1.03 – 0.97 (m, 1H).

$^{13}\text{C}$  NMR (101 MHz,  $\text{CDCl}_3$ )  $\delta$  138.3, 117.1, 64.2, 56.0, 42.3, 29.1, 28.7, 26.5, 26.1, 26.1, 22.7.

HRMS (ESI):  $m/z$  calculated for  $\text{C}_{13}\text{H}_{25}\text{NOS}$   $[\text{M} + \text{Na}]^+ = 266.1549$ ; found 266.1543.

#### (*R*)-2-Methyl-*N*-((*S*)-1-phenylallyl)propane-2-sulfinamide (3fa)

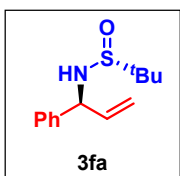

34.0 mg, 72%, yellow oil,  $R_f = 0.4$  (PE/EA = 1/1),  $dr > 20:1$ ,  $b/l > 20:1$ ,  $[\alpha]_D^{25} = -33.6$   
( $c = 0.5$ ,  $\text{CHCl}_3$ ).

$^1\text{H}$  NMR (400 MHz,  $\text{CDCl}_3$ )  $\delta$  7.36 – 7.32 (m, 4H), 7.31 – 7.27 (m, 1H), 6.07 – 6.02 (m, 1H), 5.30 (d,  $J = 17.0$  Hz, 1H), 5.20 (d,  $J = 10.2$  Hz, 1H), 4.99 – 4.96 (m, 1H),

3.49 (d,  $J = 1.6$  Hz, 1H), 1.22 (s, 9H).

$^{13}\text{C}$  NMR (101 MHz,  $\text{CDCl}_3$ )  $\delta$  140.3, 139.3, 128.6, 127.8, 127.8, 116.6, 61.6, 55.7, 22.6.

HRMS (ESI):  $m/z$  calculated for  $\text{C}_{13}\text{H}_{19}\text{NOS}$   $[\text{M} + \text{Na}]^+ = 260.1080$ ; found 260.1075.

#### (*R*)-*N*-((*S*)-1-(4-fluorophenyl)allyl)-2-methylpropane-2-sulfinamide (3ga)

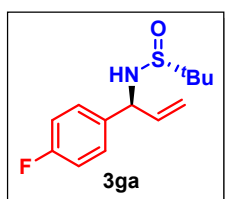

40.3 mg, 80%, colorless oil,  $R_f = 0.3$  (PE/EA = 1/1),  $dr > 20:1$ ,  $b/l > 20:1$ ,  
 $[\alpha]_D^{25} = -41.0$  ( $c = 0.5$ ,  $\text{CHCl}_3$ ).

$^1\text{H}$  NMR (400 MHz,  $\text{CDCl}_3$ )  $\delta$  7.33 – 7.27 (m, 2H), 7.06 – 7.01 (m, 2H), 6.06 – 5.07 (m, 1H), 5.28 (d,  $J = 17.0$  Hz, 1H), 5.21 (d,  $J = 10.2$  Hz, 1H), 4.97 (dd,

$J = 6.6, 3.0$  Hz, 1H), 3.49 (d,  $J = 2.4$  Hz, 1H), 1.21 (s, 9H).

$^{13}\text{C}$  NMR (101 MHz,  $\text{CDCl}_3$ )  $\delta$  162.3 (d,  $J = 246.3$  Hz), 139.1, 136.0 (d,  $J = 3.0$  Hz), 129.4 (d,  $J = 8.1$  Hz), 116.8, 115.5 (d,  $J = 21.3$  Hz), 60.7, 55.7, 22.5.

$^{19}\text{F}$  NMR (377 MHz,  $\text{CDCl}_3$ )  $\delta$  -114.4.

HRMS (ESI):  $m/z$  calculated for  $\text{C}_{13}\text{H}_{18}\text{FNOS}$   $[\text{M} + \text{Na}]^+ = 278.0985$ ; found 278.0987.

**(R)-N-((S)-1-(4-chlorophenyl)allyl)-2-methylpropane-2-sulfinamide (3ha)**

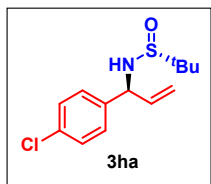

36.8 mg, 68%, colorless solid,  $R_f = 0.4$  (PE/EA = 1/1),  $dr > 20:1$ ,  $b/l > 20:1$ ,

$[\alpha]_D^{25} = -35.4$  ( $c = 0.5$ ,  $\text{CHCl}_3$ ). m.p. = 82.4-83.0 °C.

$^1\text{H NMR}$  (400 MHz,  $\text{CDCl}_3$ )  $\delta$  7.34 – 7.27 (m, 4H), 6.04 – 5.96 (m, 1H), 5.28 (d,  $J = 17.0$  Hz, 1H), 5.21 (d,  $J = 10.2$  Hz, 1H), 4.96 (dd,  $J = 6.6, 2.9$  Hz, 1H),

3.48 (d,  $J = 2.1$  Hz, 1H), 1.21 (s, 9H).

$^{13}\text{C NMR}$  (101 MHz,  $\text{CDCl}_3$ )  $\delta$  138.8, 138.8, 133.6, 129.2, 128.8, 117.0, 60.8, 55.8, 22.5.

**HRMS** (ESI):  $m/z$  calculated for  $\text{C}_{13}\text{H}_{18}\text{ClNOS}$   $[\text{M} + \text{Na}]^+ = 294.0690$ ; found 294.0685.

**(R)-N-((S)-1-(4-bromophenyl)allyl)-2-methylpropane-2-sulfinamide (3ia)**

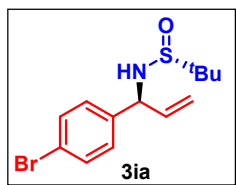

39.6 mg, 63%, yellow solid,  $R_f = 0.4$  (PE/EA = 1/1),  $dr > 20:1$ ,  $b/l > 20:1$ ,

$[\alpha]_D^{25} = -38.0$  ( $c = 0.5$ ,  $\text{CHCl}_3$ ). m.p. = 104.2-104.8 °C.

$^1\text{H NMR}$  (400 MHz,  $\text{CDCl}_3$ )  $\delta$  7.48 (d,  $J = 8.2$  Hz, 2H), 7.22 (d,  $J = 8.2$  Hz, 2H), 6.04 – 5.95 (m, 1H), 5.28 (d,  $J = 17.0$  Hz, 1H), 5.21 (d,  $J = 10.2$  Hz, 1H),

4.94 (dd,  $J = 6.4, 2.7$  Hz, 1H), 3.47 (d,  $J = 1.4$  Hz, 1H), 1.21 (s, 9H).

$^{13}\text{C NMR}$  (101 MHz,  $\text{CDCl}_3$ )  $\delta$  139.4, 138.7, 131.7, 129.5, 121.8, 117.1, 60.8, 55.8, 22.5.

**HRMS** (ESI):  $m/z$  calculated for  $\text{C}_{13}\text{H}_{18}\text{BrNOS}$   $[\text{M} + \text{Na}]^+ = 338.0185$ ; found 338.0187.

**Methyl 4-((S)-1-(((R)-tert-butylsulfinyl)amino)allyl)benzoate (3ja)**

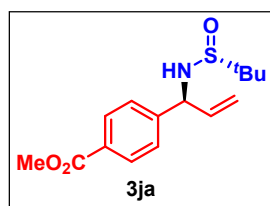

46.8 mg, 80%, yellow solid,  $R_f = 0.3$  (PE/EA = 1/1),  $dr > 20:1$ ,  $b/l > 20:1$ ,

$[\alpha]_D^{25} = -29.2$  ( $c = 0.25$ ,  $\text{CHCl}_3$ ). m.p. = 97.7-98.0 °C.

$^1\text{H NMR}$  (400 MHz,  $\text{CDCl}_3$ )  $\delta$  8.02 (d,  $J = 8.2$  Hz, 2H), 7.42 (d,  $J = 8.2$  Hz, 2H), 6.07 – 6.00 (m, 1H), 5.30 (d,  $J = 17.0$  Hz, 1H), 5.23 (d,  $J = 10.2$  Hz,

1H), 5.05 – 5.03 (m, 1H), 3.91 (s, 3H), 3.54 (d,  $J = 2.2$  Hz, 1H), 1.22 (s, 9H).

$^{13}\text{C NMR}$  (101 MHz,  $\text{CDCl}_3$ )  $\delta$  166.7, 145.5, 138.5, 129.9, 129.7, 127.8, 117.4, 61.2, 55.9, 52.1, 22.6.

**HRMS** (ESI):  $m/z$  calculated for  $\text{C}_{15}\text{H}_{21}\text{NOS}$   $[\text{M} + \text{Na}]^+ = 318.1134$ ; found 318.1133.

**(R)-2-Methyl-N-((S)-1-(o-tolyl)allyl)propane-2-sulfinamide (3ka)**

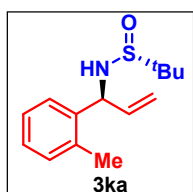

41.1 mg, 82%, colorless oil,  $R_f = 0.6$  (PE/EA = 1/1),  $dr > 20:1$ ,  $b/l > 20:1$ ,  $[\alpha]_D^{25} = -29.2$  ( $c = 0.25$ ,  $\text{CHCl}_3$ ).

**<sup>1</sup>H NMR** (400 MHz, CDCl<sub>3</sub>) δ 7.38 – 7.32 (m, 1H), 7.24 – 7.11 (m, 3H), 6.08 – 6.00 (m, 1H), 5.25 – 5.18 (m, 3H), 3.48 (d, *J* = 2.3 Hz, 1H), 2.39 (s, 3H), 1.22 (s, 9H).

**<sup>13</sup>C NMR** (101 MHz, CDCl<sub>3</sub>) δ 138.6, 138.2, 136.2, 130.6, 127.5, 127.3, 126.2, 116.7, 57.5, 55.7, 22.6, 19.4.

**HRMS** (ESI): *m/z* calculated for C<sub>15</sub>H<sub>21</sub>NOS [M + Na]<sup>+</sup> = 318.1134; found 318.1133.

**(*R*)-*N*-((*S*)-1-(3-methoxyphenyl)allyl)-2-methylpropane-2-sulfinamide (3la)**

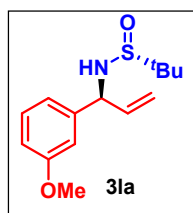

42.2 mg, 79%, yellow oil, *R<sub>f</sub>* = 0.4 (PE/EA = 1/1), *dr* > 20:1, *b/l* > 20:1, [α]<sub>D</sub><sup>25</sup> = -51.3 (*c* = 0.6, CHCl<sub>3</sub>).

**<sup>1</sup>H NMR** (400 MHz, CDCl<sub>3</sub>) δ 7.30 – 7.23 (m, 1H), 6.97 – 6.86 (m, 2H), 6.85 – 6.80 (m, 1H), 6.07 – 5.99 (m, 1H), 5.30 (d, *J* = 10.2 Hz, 1H), 5.20 (d, *J* = 10.2 Hz, 1H), 4.96 – 4.93 (m, 1H), 3.80 (s, 3H), 3.48 (d, *J* = 3.3 Hz, 1H), 1.23 (s, 9H).

**<sup>13</sup>C NMR** (101 MHz, CDCl<sub>3</sub>) δ 159.9, 143.1, 138.1, 129.9, 119.4, 117.5, 113.2, 112.9, 61.4, 55.7, 55.2, 22.7.

**HRMS** (ESI): *m/z* calculated for C<sub>14</sub>H<sub>21</sub>NO<sub>2</sub>S [M + Na]<sup>+</sup> = 290.1185; found 290.1181.

**(*R*)-*N*-((*S*)-1-([1,1'-biphenyl]-4-yl)allyl)-2-methylpropane-2-sulfinamide (3ma)**

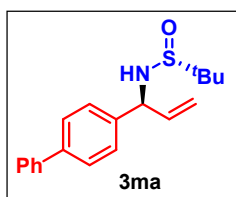

55.5 mg, 89%, yellow solid, *R<sub>f</sub>* = 0.4 (PE/EA = 1/1), *dr* > 20:1, *b/l* > 20:1, [α]<sub>D</sub><sup>25</sup> = -44.0 (*c* = 0.25, CHCl<sub>3</sub>). *m.p.* = 157.7-157.9 °C.

**<sup>1</sup>H NMR** (400 MHz, CDCl<sub>3</sub>) δ 7.60 – 7.57 (m, 4H), 7.45 – 7.40 (m, 4H), 7.36 – 7.32 (m, 1H), 6.12 – 6.04 (m, 1H), 5.33 (d, *J* = 17.0 Hz, 1H), 5.23 (d, *J* = 10.2 Hz, 1H), 5.02 (dd, *J* = 6.3, 3.3 Hz, 1H), 3.52 (d, *J* = 2.7 Hz, 1H), 1.24 (s, 9H).

**<sup>13</sup>C NMR** (101 MHz, CDCl<sub>3</sub>) δ 140.7, 140.6, 139.4, 139.2, 128.7, 128.2, 127.3, 127.1, 116.7, 61.3, 55.8, 22.6.

**HRMS** (ESI): *m/z* calculated for C<sub>19</sub>H<sub>23</sub>NOS [M + Na]<sup>+</sup> = 336.1393; found 336.1386.

**(*S*)-2-Methyl-*N*-((*R*)-5-phenylpent-1-en-3-yl)propane-2-sulfinamide (4ab)**

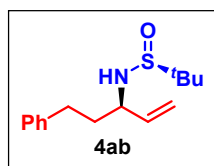

48.7 mg, 92%, colorless oil, *R<sub>f</sub>* = 0.5 (PE/EA = 1/1), *dr* > 20:1, *b/l* > 20:1, [α]<sub>D</sub><sup>25</sup> = +44.4 (*c* = 0.25, CHCl<sub>3</sub>).

**<sup>1</sup>H NMR** (400 MHz, CDCl<sub>3</sub>) δ 7.30 – 7.26 (m, 2H), 7.21 – 7.14 (m, 3H), 5.80 – 5.62 (m, 1H), 5.38 – 5.17 (m, 2H), 3.89 – 3.77 (m, 1H), 3.16 (d, *J* = 2.6 Hz, 1H), 2.79 – 2.57 (m, 2H), 1.96 – 1.86 (m, 2H), 1.19 (s, 9H).

**<sup>13</sup>C NMR** (101 MHz, CDCl<sub>3</sub>) δ 141.3, 138.8, 128.5, 128.4, 126.0, 117.5, 58.0, 55.4, 37.9, 31.8, 22.5.

**HRMS** (ESI): *m/z* calculated for C<sub>15</sub>H<sub>23</sub>NOS [M + Na]<sup>+</sup> = 288.1393; found 288.1390.

**(S)-N-((R)-but-3-en-2-yl)-2-methylpropane-2-sulfinamide (4bb)**

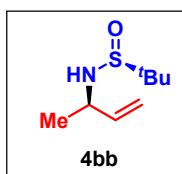

29.1 mg, 83%, colorless oil,  $R_f = 0.4$  (PE/EA = 1/1),  $dr > 20:1$ ,  $b/l > 20:1$ ,  $[\alpha]_D^{25} = +33.0$  ( $c = 0.5$ ,  $\text{CHCl}_3$ ).

$^1\text{H NMR}$  (400 MHz,  $\text{CDCl}_3$ )  $\delta$  5.79 – 5.70 (m, 1H), 5.22 (d,  $J = 17.2$  Hz, 1H), 5.11 (d,  $J = 10.3$  Hz, 1H), 4.11 – 3.87 (m, 1H), 3.06 (d,  $J = 4.0$  Hz, 1H), 1.35 (t,  $J = 10.0$  Hz, 3H), 1.22 (s, 9H).

$^{13}\text{C NMR}$  (101 MHz,  $\text{CDCl}_3$ )  $\delta$  140.5, 115.5, 55.4, 53.6, 22.8, 22.5.

**HRMS** (ESI):  $m/z$  calculated for  $\text{C}_8\text{H}_{17}\text{NOS}$   $[\text{M} + \text{Na}]^+ = 198.0923$ ; found 198.0919.

**(S)-2-Methyl-N-((R)-oct-1-en-3-yl)propane-2-sulfinamide (4cb)**

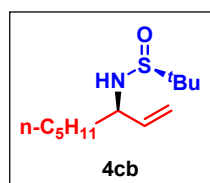

42.2 mg, 91%, colorless oil,  $R_f = 0.6$  (PE/EA = 1/1),  $dr > 20:1$ ,  $b/l > 20:1$ ,  $[\alpha]_D^{25} = +50.4$  ( $c = 0.25$ ,  $\text{CHCl}_3$ ).

$^1\text{H NMR}$  (400 MHz,  $\text{CDCl}_3$ )  $\delta$  5.68 – 5.59 (m, 1H), 5.22 (d,  $J = 17.1$  Hz, 1H), 5.16 (d,  $J = 10.2$  Hz, 1H), 3.83 – 3.73 (m, 1H), 3.10 (s, 1H), 1.63 – 1.50 (m, 2H),

1.35 – 1.29 (m, 6H), 1.21 (s, 9H), 0.88 (t,  $J = 6.4$  Hz, 3H).

$^{13}\text{C NMR}$  (101 MHz,  $\text{CDCl}_3$ )  $\delta$  139.1, 117.0, 58.2, 55.3, 36.4, 31.5, 25.2, 22.6, 22.5, 14.0.

**HRMS** (ESI):  $m/z$  calculated for  $\text{C}_{12}\text{H}_{25}\text{NOS}$   $[\text{M} + \text{Na}]^+ = 254.1549$ ; found 254.1545.

**(S)-N-((S)-1-cyclopropylallyl)-2-methylpropane-2-sulfinamide (4db)**

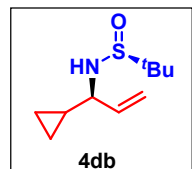

37.9 mg, 94%, colorless oil,  $R_f = 0.5$  (PE/EA = 1/1),  $dr > 20:1$ ,  $b/l > 20:1$ ,  $[\alpha]_D^{25} = +74.0$  ( $c = 0.25$ ,  $\text{CHCl}_3$ ).

$^1\text{H NMR}$  (400 MHz,  $\text{CDCl}_3$ )  $\delta$  5.82 – 5.75 (m, 1H), 5.24 (d,  $J = 17.1$  Hz, 1H), 5.16 (d,  $J = 10.3$  Hz, 1H), 3.31 (s, 1H), 3.10 – 2.97 (m, 1H), 1.23 (s, 9H), 1.01 – 0.95 (m, 1H), 0.64 – 0.56 (m, 2H), 0.44 – 0.38 (m, 1H), 0.35 – 0.29 (m, 1H).

$^{13}\text{C NMR}$  (101 MHz,  $\text{CDCl}_3$ )  $\delta$  138.1, 116.6, 62.9, 55.3, 22.6, 17.2, 4.3, 3.5.

**HRMS** (ESI):  $m/z$  calculated for  $\text{C}_{10}\text{H}_{19}\text{NOS}$   $[\text{M} + \text{Na}]^+ = 224.1080$ ; found 224.1078.

**(S)-2-Methyl-N-((S)-1-phenylallyl)propane-2-sulfinamide (4fb)**

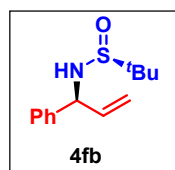

46.5 mg, 95%, yellow oil,  $R_f = 0.5$  (PE/EA = 1/1),  $dr > 20:1$ ,  $b/l > 20:1$ ,  $[\alpha]_D^{25} = +66.0$  ( $c = 0.5$ ,  $\text{CHCl}_3$ ).

$^1\text{H NMR}$  (400 MHz,  $\text{CDCl}_3$ )  $\delta$  7.36 – 7.33 (m, 4H), 7.32 – 7.24 (m, 1H), 5.99 – 5.83 (m, 1H), 5.38 (d,  $J = 17.0$  Hz, 1H), 5.24 (d,  $J = 10.1$  Hz, 1H), 4.98 – 4.96 (m, 1H), 3.47 (s, 1H), 1.25 (s, 9H).

$^{13}\text{C NMR}$  (101 MHz,  $\text{CDCl}_3$ )  $\delta$  141.5, 138.3, 128.9, 128.0, 127.1, 117.5, 61.5, 55.6, 22.7.

**HRMS** (ESI):  $m/z$  calculated for  $C_{13}H_{19}NOS$   $[M + Na]^+ = 260.1080$ ; found 260.1074.

**(S)-N-((S)-1-(4-fluorophenyl)allyl)-2-methylpropane-2-sulfinamide (4gb)**

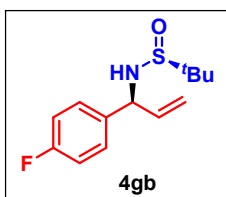

25.9 mg, 51%, yellow oil,  $R_f = 0.6$  (PE/EA = 1/1),  $dr > 20:1$ ,  $b/l > 20:1$ ,  $[\alpha]_D^{25} = +48.4$  ( $c = 0.5$ ,  $CHCl_3$ ).

**$^1H$  NMR** (400 MHz,  $CDCl_3$ )  $\delta$  7.35 – 7.32 (m, 2H), 7.06 – 7.02 (m, 2H), 5.99 – 5.81 (m, 1H), 5.36 (d,  $J = 17.0$  Hz, 1H), 5.25 (d,  $J = 10.1$  Hz, 1H), 4.96 (dd,  $J = 7.2, 2.3$  Hz, 1H), 3.42 (d,  $J = 4.0$  Hz, 1H), 1.25 (s, 9H).

**$^{13}C$  NMR** (101 MHz,  $CDCl_3$ )  $\delta$  162.3 (d,  $J = 246.8$  Hz), 138.1, 137.3 (d,  $J = 3.1$  Hz), 128.9 (d,  $J = 8.2$  Hz), 117.6, 115.7 (d,  $J = 21.4$  Hz), 60.8, 55.7, 22.6.

**$^{19}F$  NMR** (377 MHz,  $CDCl_3$ )  $\delta$  -114.0.

**HRMS** (ESI):  $m/z$  calculated for  $C_{13}H_{18}FNOS$   $[M + Na]^+ = 278.0985$ ; found 278.0982.

**(S)-N-((S)-1-(4-chlorophenyl)allyl)-2-methylpropane-2-sulfinamide (4hb)**

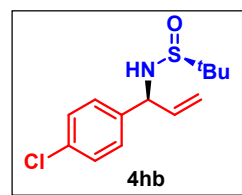

45.7 mg, 84%, yellow solid,  $R_f = 0.7$  (PE/EA = 1/1),  $dr > 20:1$ ,  $b/l > 20:1$ ,  $[\alpha]_D^{25} = +80.0$  ( $c = 0.5$ ,  $CHCl_3$ ). m.p. = 60.7-61.0 °C.

**$^1H$  NMR** (400 MHz,  $CDCl_3$ )  $\delta$  7.34 – 7.28 (m, 4H), 5.94 – 5.85 (m, 1H), 5.37 (d,  $J = 17.0$  Hz, 1H), 5.25 (d,  $J = 10.1$  Hz, 1H), 4.95 (dd,  $J = 7.1, 2.2$  Hz, 1H),

3.43 (d,  $J = 2.0$  Hz, 1H), 1.25 (s, 9H).

**$^{13}C$  NMR** (101 MHz,  $CDCl_3$ )  $\delta$  140.0, 137.8, 133.8, 129.0, 128.6, 117.8, 60.9, 55.7, 22.6.

**HRMS** (ESI):  $m/z$  calculated for  $C_{13}H_{18}ClNOS$   $[M + Na]^+ = 294.0690$ ; found 294.0690.

**(S)-N-((S)-1-(4-bromophenyl)allyl)-2-methylpropane-2-sulfinamide (4ib)**

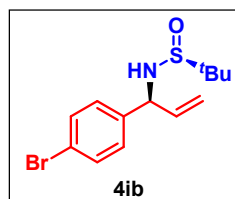

44.0 mg, 88%, yellow solid,  $R_f = 0.6$  (PE/EA = 1/1),  $dr > 20:1$ ,  $b/l > 20:1$ ,  $[\alpha]_D^{25} = +70.6$  ( $c = 0.5$ ,  $CHCl_3$ ). m.p. = 100.1-100.7 °C.

**$^1H$  NMR** (400 MHz,  $CDCl_3$ )  $\delta$  7.48 (d,  $J = 8.1$  Hz, 2H), 7.24 (d,  $J = 8.1$  Hz, 2H), 5.93 – 5.85 (m, 1H), 5.37 (d,  $J = 17.0$  Hz, 1H), 5.25 (d,  $J = 10.1$  Hz, 1H),

4.94 – 4.93 (m, 1H), 3.43 (d,  $J = 4.0$  Hz, 1H), 1.25 (s, 9H).

**$^{13}C$  NMR** (101 MHz,  $CDCl_3$ )  $\delta$  140.5, 137.7, 132.0, 128.9, 121.9, 117.9, 60.9, 55.7, 22.6.

**HRMS** (ESI):  $m/z$  calculated for  $C_{13}H_{18}BrNOS$   $[M + Na]^+ = 338.0185$ ; found 338.0184.

**Methyl 4-((S)-1-(((S)-tert-butylsulfinyl)amino)allyl)benzoate (4jb)**

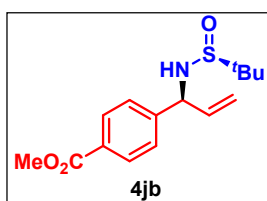

55.0 mg, 93%, colorless oil,  $R_f = 0.6$  (PE/EA = 1/1),  $dr > 20:1$ ,  $b/l > 20:1$ ,

$[\alpha]_D^{25} = +51.2$  ( $c = 0.25$ ,  $CHCl_3$ ).

**<sup>1</sup>H NMR** (400 MHz, CDCl<sub>3</sub>) δ 8.02 (d, *J* = 8.2 Hz, 2H), 7.44 (d, *J* = 8.2 Hz, 2H), 5.96 – 5.87 (m, 1H), 5.39 (d, *J* = 17.0 Hz, 2H), 5.28 (d, *J* = 10.1 Hz, 2H), 5.03 (dd, *J* = 7.3, 2.5 Hz, 1H), 3.91 (s, 1H), 3.53 (d, *J* = 4.0 Hz, 1H), 1.26 (s, 9H).

**<sup>13</sup>C NMR** (101 MHz, CDCl<sub>3</sub>) δ 166.6, 146.3, 137.6, 130.2, 129.8, 127.2, 118.2, 61.3, 55.8, 52.1, 22.6.

**HRMS** (ESI): *m/z* calculated for C<sub>15</sub>H<sub>21</sub>NOS [M + Na]<sup>+</sup> = 318.1134; found 318.1132.

**(*S*)-2-Methyl-N-((*S*)-1-(*o*-tolyl)allyl)propane-2-sulfinamide (4kb)**

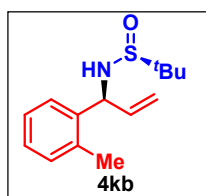

44.0 mg, 88%, colorless oil, *R*<sub>f</sub> = 0.6 (PE/EA = 1/1), *dr* > 20:1, *b/l* > 20:1,  $[\alpha]_D^{25}$  = +43.2 (*c* = 0.5, CHCl<sub>3</sub>).

**<sup>1</sup>H NMR** (400 MHz, CDCl<sub>3</sub>) δ 7.40 – 7.38 (m, 1H), 7.25 – 7.12 (m, 3H), 5.91 – 5.82 (m, 1H), 5.37 (d, *J* = 17.1 Hz, 1H), 5.24 (d, *J* = 10.1 Hz, 1H), 5.20 – 5.18 (m,

1H), 3.41 (d, *J* = 4.0 Hz, 1H), 2.40 (s, 3H), 1.26 (s, 9H).

**<sup>13</sup>C NMR** (101 MHz, CDCl<sub>3</sub>) δ 139.2, 137.6, 135.7, 130.9, 127.7, 126.5, 117.5, 57.1, 55.6, 22.7, 19.3.

**HRMS** (ESI): *m/z* calculated for C<sub>14</sub>H<sub>21</sub>NOS [M + Na]<sup>+</sup> = 274.1232; found 274.1236.

**(*S*)-N-((*S*)-1-(3-methoxyphenyl)allyl)-2-methylpropane-2-sulfinamide (4lb)**

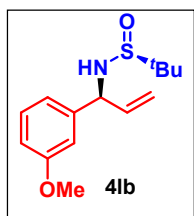

43.8 mg, 82%, colorless oil, *R*<sub>f</sub> = 0.4 (PE/EA = 1/1), *dr* > 20:1, *b/l* > 20:1,  $[\alpha]_D^{25}$  = +57.1 (*c* = 0.7, CHCl<sub>3</sub>).

**<sup>1</sup>H NMR** (400 MHz, CDCl<sub>3</sub>) δ 7.30 – 7.23 (m, 1H), 6.97 – 6.91 (m, 2H), 6.85 – 6.82 (m, 1H), 5.96 – 5.87 (m, 1H), 5.38 (d, *J* = 17.0 Hz, 1H), 5.24 (d, *J* = 10.1 Hz,

1H), 4.95 – 4.93 (m, 1H), 3.81 (s, 3H), 3.48 (s, 1H), 1.25 (s, 9H).

**<sup>13</sup>C NMR** (101 MHz, CDCl<sub>3</sub>) δ 159.8, 142.0, 139.2, 129.6, 120.1, 116.7, 113.3, 113.2, 61.6, 55.8, 55.2, 22.6.

**HRMS** (ESI): *m/z* calculated for C<sub>14</sub>H<sub>21</sub>NO<sub>2</sub>S [M + Na]<sup>+</sup> = 290.1185; found 290.1190.

**(*S*)-N-((*S*)-1-([1,1'-biphenyl]-4-yl)allyl)-2-methylpropane-2-sulfinamide (4mb)**

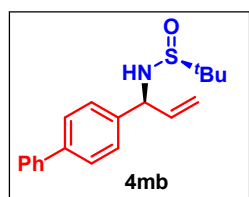

49.0 mg, 78%, yellow oil, *R*<sub>f</sub> = 0.5 (PE/EA = 1/1), *dr* > 20:1, *b/l* > 20:1,

$[\alpha]_D^{25}$  = +42.0 (*c* = 0.25, CHCl<sub>3</sub>).

**<sup>1</sup>H NMR** (400 MHz, CDCl<sub>3</sub>) δ 7.59 – 7.56 (m, 4H), 7.46 – 7.40 (m, 4H), 7.36 – 7.34 (m, 1H), 6.01 – 5.92 (m, 1H), 5.42 (d, *J* = 17.0 Hz, 1H), 5.27 (d, *J* =

10.1 Hz, 1H), 5.02 (d,  $J = 6.0$  Hz, 1H), 3.51 (d,  $J = 4.0$  Hz, 1H), 1.27 (s, 9H).

$^{13}\text{C}$  NMR (101 MHz,  $\text{CDCl}_3$ )  $\delta$  141.0, 140.6, 140.5, 138.2, 128.8, 127.6, 127.6, 127.4, 127.1, 117.6, 60.8, 55.7, 22.7.

**HRMS** (ESI):  $m/z$  calculated for  $\text{C}_{19}\text{H}_{23}\text{NOS}$   $[\text{M} + \text{Na}]^+ = 336.1393$ ; found 336.1392.

## 7. Stereodivergent synthesis of all four stereoisomers.

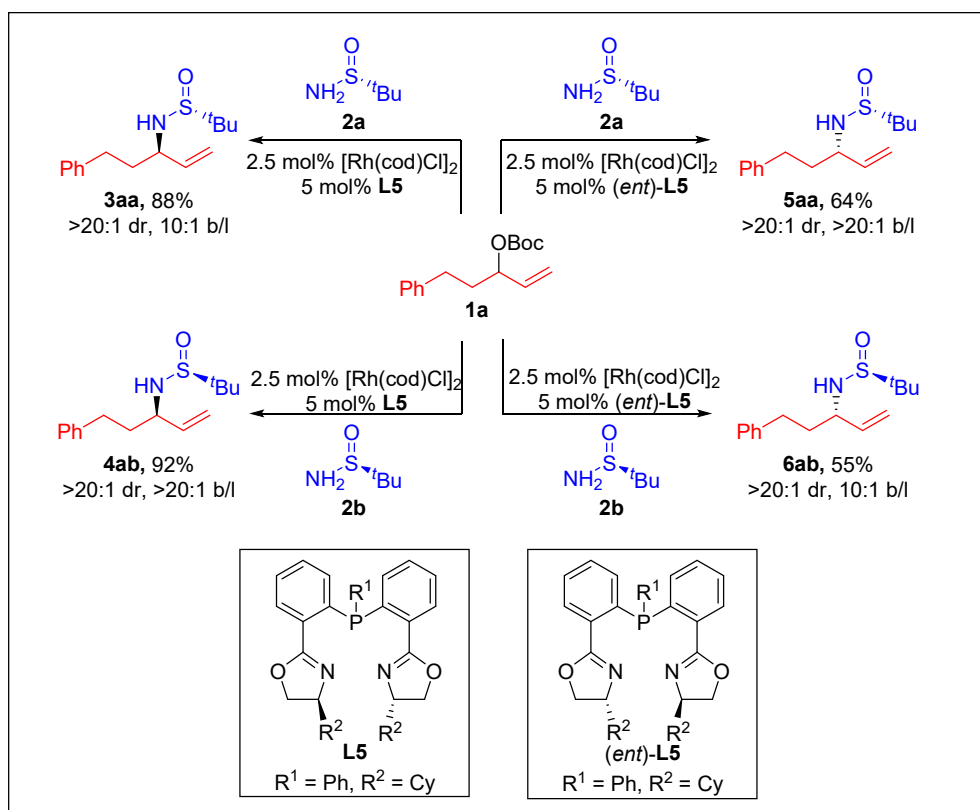

In a  $\text{N}_2$ -filled glovebox, a pressure tube equipped with a magnetic stir bar was charged with  $[\text{Rh}(\text{cod})\text{Cl}]_2$  (2.5 mg, 2.5 mol%), **L5** or *(ent)*-**L5** (5.6 mg, 5.0 mol%) and THF (1.0 mL). The reaction mixture was stirred at room temperature for 15 minutes. **1a** (78.6 mg, 0.3 mmol, 1.5 eq) and **2a** or **2b** (24.2 mg, 0.2 mmol, 1.0 eq) were added to the above solution. The tube was tightly capped, transferred out of the glovebox and heated at 80 °C for 24 hours. After cooling down, the crude mixture was concentrated and the residue was purified by column chromatography to get the corresponding product.



## 8. Synthetic applications.

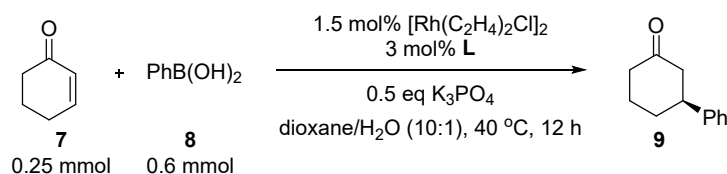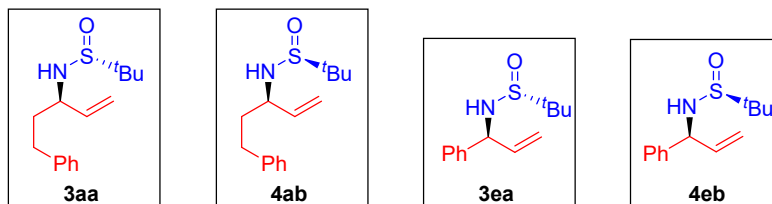

| entry | Ligand     | Yield | <i>ee</i> |
|-------|------------|-------|-----------|
| 1     | <b>3aa</b> | 96%   | 53%       |
| 2     | <b>4ab</b> | 93%   | -87%      |
| 3     | <b>3ea</b> | 97%   | -80%      |
| 4     | <b>4eb</b> | 95%   | 80%       |

**General procedure:** A pressure tube equipped with a magnetic stir bar was charged with  $[\text{Rh}(\text{C}_2\text{H}_4)_2\text{Cl}]_2$  (1.5 mg, 1.5 mol%), **L** (3.0 mol%). The tube was purged with argon for 3 minutes. Dioxane (0.5 mL) and  $\text{H}_2\text{O}$  (0.05 mL) were added, followed by the 2-cyclohexen-1-one (24.0 mg, 0.25 mmol, 1.0 equiv.), phenylboronic acid (73.2 mg, 0.6 mmol, 2.4 equiv.) and  $\text{K}_3\text{PO}_4$  (26.5 mg, 0.5 equiv.). The tube was sealed with a PTFE lined cap and was stirred in an oil bath at 40 °C for 12 hours. After cooled down, the crude reaction mixture was directly subjected to flash column chromatography.

**(S)-3-phenylcyclohexan-1-one (9)** 40.5 mg, 93%, colorless oil,  $R_f = 0.4$  (PE/EA = 20/1).

The NMR data was reported according to the literature<sup>5</sup>.

**HPLC** (Shimadzu LC-2030) (Daicel Chiralcel<sup>®</sup> OD-H Column,  $\text{PrOH} : \text{Hexane} = 1.0 : 99.0$ , 1.0 ml/min), 40 °C, 220 nm,  $R_t = 15.801$  min (major) and 17.319 min (minor), 93.3:6.7 *er*.

mV

Chromatogram

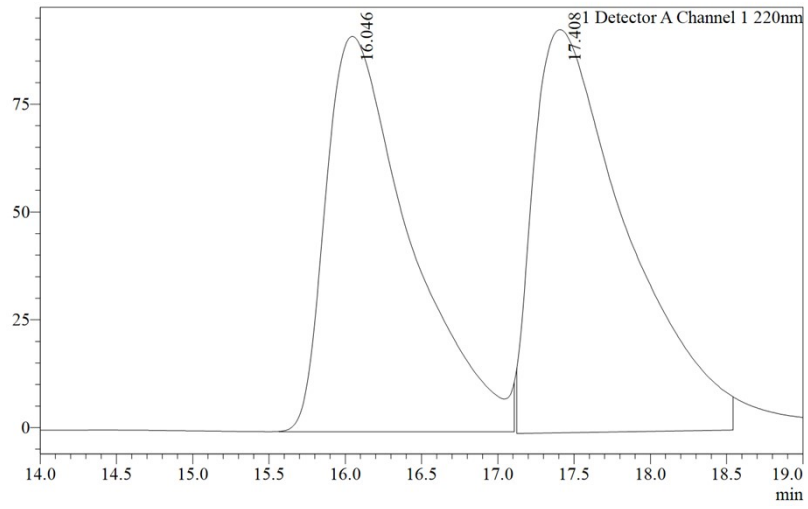

Peak Table

Detector A Channel 1 220nm

| Peak# | Ret. Time | Area    | Height | Area%   |
|-------|-----------|---------|--------|---------|
| 1     | 16.046    | 3531054 | 91640  | 47.052  |
| 2     | 17.408    | 3973454 | 93441  | 52.948  |
| Total |           | 7504508 | 185081 | 100.000 |

mV

Chromatogram

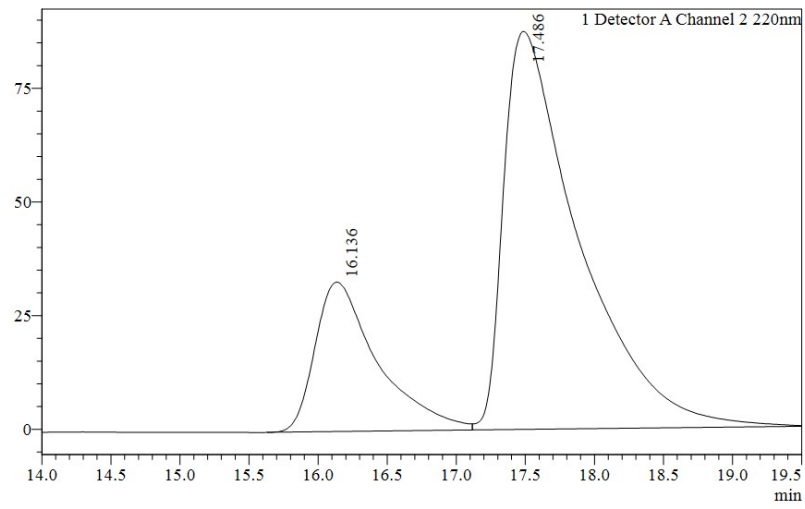

Peak Table

Detector A Channel 2 220nm

| Peak# | Ret. Time | Area    | Height | Area%   |
|-------|-----------|---------|--------|---------|
| 1     | 16.136    | 1037177 | 32889  | 23.702  |
| 2     | 17.486    | 3338725 | 87559  | 76.298  |
| Total |           | 4375902 | 120448 | 100.000 |

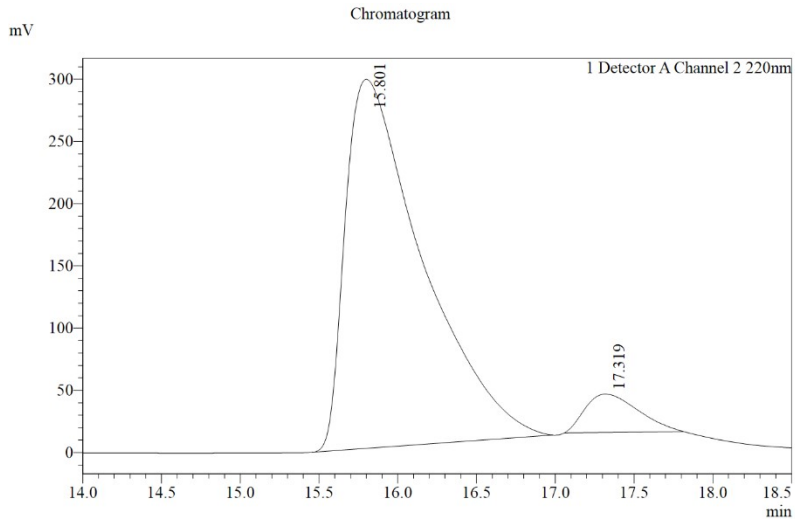

Peak Table

| Peak# | Ret. Time | Area     | Height | Area%   |
|-------|-----------|----------|--------|---------|
| 1     | 15.801    | 10118693 | 296630 | 93.325  |
| 2     | 17.319    | 723716   | 30852  | 6.675   |
| Total |           | 10842409 | 327483 | 100.000 |

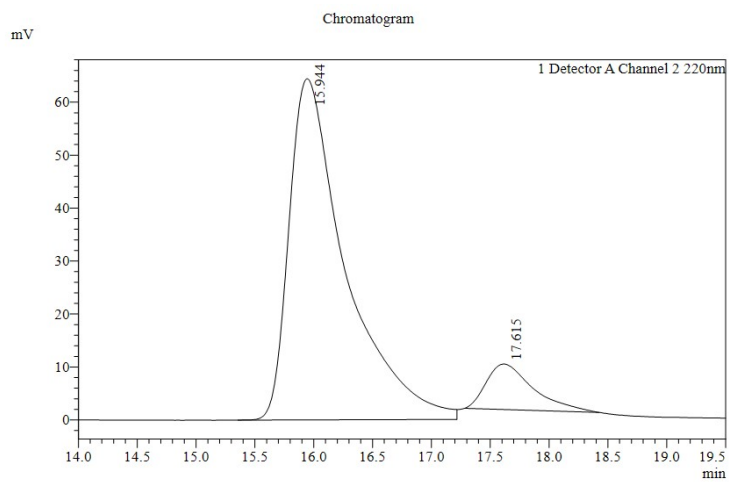

Peak Table

| Peak# | Ret. Time | Area    | Height | Area%   |
|-------|-----------|---------|--------|---------|
| 1     | 15.944    | 2143391 | 64425  | 90.021  |
| 2     | 17.615    | 237601  | 8573   | 9.979   |
| Total |           | 2380992 | 72998  | 100.000 |

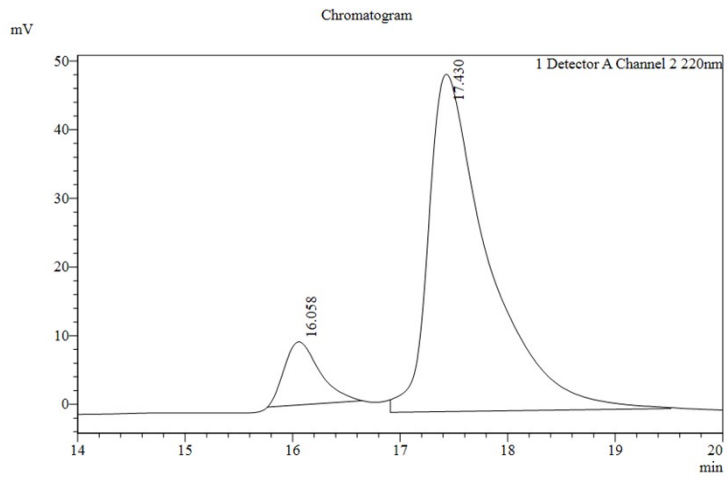

Peak Table

| Detector A Channel 2 220nm |           |         |        |         |
|----------------------------|-----------|---------|--------|---------|
| Peak#                      | Ret. Time | Area    | Height | Area%   |
| 1                          | 16.058    | 210628  | 9185   | 9.944   |
| 2                          | 17.430    | 1907497 | 49110  | 90.056  |
| Total                      |           | 2118125 | 58294  | 100.000 |

## 9. The inhibition effect of allylic tert-butanesulfinamide.

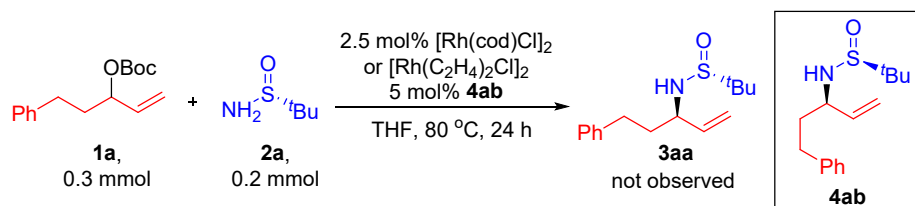

In a  $\text{N}_2$ -filled glovebox, a pressure tube equipped with a magnetic stir bar was charged with  $[\text{Rh}(\text{cod})\text{Cl}]_2$  (2.5 mg, 2.5 mol%) or  $[\text{Rh}(\text{C}_2\text{H}_4)_2\text{Cl}]_2$  (1.9 mg, 2.5 mol%), **4ab** (2.7 mg, 5.0 mol%), THF (1.0 mL). The reaction mixture was stirred at room temperature for 15 minutes. **1a** (78.6 mg, 0.3 mmol, 1.5 eq) and **2a** (24.2 mg, 0.2 mmol, 1.0 eq) were added to the above solution. The tube was tightly capped, transferred out of the glovebox and heated at 80 °C for 24 hours. **3aa** was not observed.

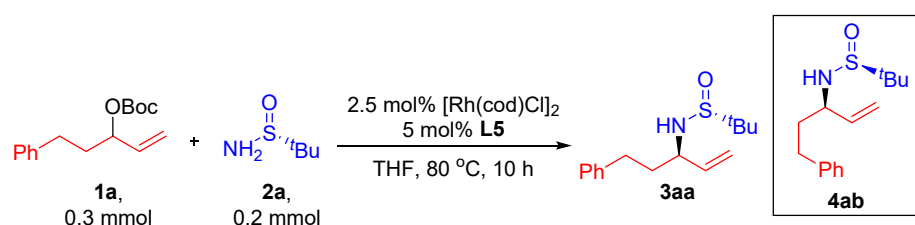

without additive 57%, >20:1 dr, 10:1 b/l (eq 1)

with 20 mol% **4ab** 39%, >20:1 dr, 10:1 b/l (eq 2)

In a  $\text{N}_2$ -filled glovebox, a pressure tube equipped with a magnetic stir bar was charged with  $[\text{Rh}(\text{cod})\text{Cl}]_2$  (2.5 mg, 2.5 mol%), **L5** (5.6 mg, 5.0 mol%), THF (1.0 mL). The reaction mixture was stirred at room temperature for 15 minutes. **1a** (78.6 mg, 0.3 mmol, 1.5 eq) and **2a** (24.2 mg, 0.2 mmol, 1.0 eq) were added to the above solution. The tube was tightly capped, transferred out of the glovebox and heated at 80 °C for 10 hours. After cooling down, the crude mixture was concentrated and the residue was purified by column chromatography to get **3aa** (57% yield, 30.2 mg, > 20:1 dr, 10:1 b/l).

In a  $\text{N}_2$ -filled glovebox, a pressure tube equipped with a magnetic stir bar was charged with  $[\text{Rh}(\text{cod})\text{Cl}]_2$  (2.5 mg, 2.5 mol%), **L5** (5.6 mg, 5.0 mol%), **4ab** (10.6 mg, 20.0 mol%), THF (1.0 mL). The reaction mixture was stirred at room temperature for 15 minutes. **1a** (78.6 mg, 0.3 mmol, 1.5 eq) and **2a** (24.2 mg, 0.2 mmol, 1.0 eq) were added to the above solution. The tube was tightly capped, transferred out of the glovebox and heated at 80 °C for 10 hours. After cooling down, the crude mixture was concentrated and the residue was purified by column chromatography to get **3aa** (39% yield, 20.7 mg, > 20:1 dr, 10:1 b/l).

## 10. Single crystal X-ray diffraction data.

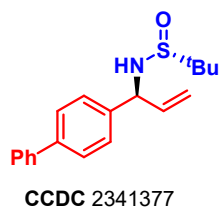

≡

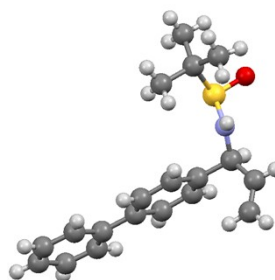

|                                               |                                                                                                     |
|-----------------------------------------------|-----------------------------------------------------------------------------------------------------|
| Empirical formula                             | C <sub>19</sub> H <sub>23</sub> NOS                                                                 |
| Formula weight                                | 313.44                                                                                              |
| CCDC Number                                   | 2341377                                                                                             |
| Crystal habit, colour                         | colourless                                                                                          |
| Crystal size, mm <sup>3</sup>                 | 0.220 x 0.200 x 0.180                                                                               |
| Temperature, K                                | 173(2)                                                                                              |
| Wavelength, λ (Å)                             | 1.54178                                                                                             |
| Crystal system                                | Orthorhombic                                                                                        |
| Space group                                   | P2(1)2(1)2(1)                                                                                       |
| Unit cell dimensions                          | a = 5.7083(3) Å alpha = 90 deg<br>b = 17.0851(9) Å beta = 90 deg<br>c = 17.0851(9) Å gamma = 90 deg |
| Volume, V (Å <sup>3</sup> )                   | 1666.26(15)                                                                                         |
| Z                                             | 4                                                                                                   |
| Calculated density, mg·m <sup>-3</sup>        | 1.249                                                                                               |
| Absorption coefficient, μ (mm <sup>-1</sup> ) | 1.721                                                                                               |
| F(000)                                        | 672                                                                                                 |
| θ range for data collection                   | 3.659 to 68.286 deg.                                                                                |
| Limiting indices                              | -6 ≤ h ≤ 6, -20 ≤ k ≤ 20, -17 ≤ l ≤ 20                                                              |
| Reflection collected/unique                   | 24611 / 3036 [R(int) = 0.0354]                                                                      |
| Completeness to θ                             | 67.679 99.8 %                                                                                       |
| Absolute structure parameter                  | 0.034(4)                                                                                            |
| Refinement method                             | Full-matrix least-squares on F <sup>2</sup>                                                         |
| Data/restraints/parameters                    | 3036 / 0 / 202                                                                                      |
| Goodness-of-fit on F <sup>2</sup>             | 1.009                                                                                               |
| Final R indices [I > 2σ(I)]                   | R1 = 0.0312, wR2 = 0.0883                                                                           |
| R indices (all data)                          | R1 = 0.0318, wR2 = 0.0888                                                                           |
| Largest diff. peak and hole                   | 0.354 and -0.285 e·Å <sup>-3</sup>                                                                  |

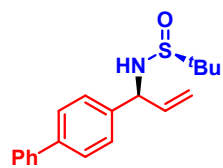

CCDC 2341379

≡

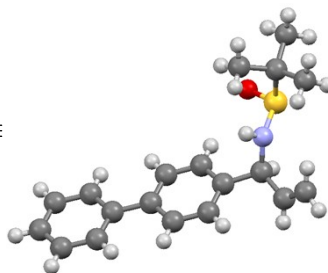

|                                               |                                                                                                        |
|-----------------------------------------------|--------------------------------------------------------------------------------------------------------|
| Empirical formula                             | C <sub>19</sub> H <sub>23</sub> NOS                                                                    |
| Formula weight                                | 313.44                                                                                                 |
| CCDC Number                                   | 2341379                                                                                                |
| Crystal habit, colour                         | colourless                                                                                             |
| Crystal size, mm <sup>3</sup>                 | 0.180 x 0.160 x 0.140                                                                                  |
| Temperature, K                                | 100(2)                                                                                                 |
| Wavelength, λ (Å)                             | 1.54184                                                                                                |
| Crystal system                                | Orthorhombic                                                                                           |
| Space group                                   | P2(1)2(1)2(1)                                                                                          |
| Unit cell dimensions                          | a = 5.52328(9) Å alpha = 90 deg<br>b = 10.30853(16) Å beta = 90 deg<br>c = 28.9172(5) Å gamma = 90 deg |
| Volume, V (Å <sup>3</sup> )                   | 1646.46(5)                                                                                             |
| Z                                             | 4                                                                                                      |
| Calculated density, mg·m <sup>-3</sup>        | 1.264                                                                                                  |
| Absorption coefficient, μ (mm <sup>-1</sup> ) | 1.742                                                                                                  |
| F(000)                                        | 672                                                                                                    |
| θ range for data collection                   | 3.056 to 75.259 deg.                                                                                   |
| Limiting indices                              | -6 ≤ h ≤ 6, -9 ≤ k ≤ 12, -35 ≤ l ≤ 35                                                                  |
| Reflection collected/unique                   | 8412 / 3084 [R(int) = 0.0288]                                                                          |
| Completeness to θ                             | 67.684 100.0 %                                                                                         |
| Absolute structure parameter                  | 0.011(12)                                                                                              |
| Refinement method                             | Full-matrix least-squares on F <sup>2</sup>                                                            |
| Data/restraints/parameters                    | 3084 / 0 / 205                                                                                         |
| Goodness-of-fit on F <sup>2</sup>             | 1.034                                                                                                  |
| Final R indices [I > 2σ(I)]                   | R1 = 0.0318, wR2 = 0.0864                                                                              |
| R indices (all data)                          | R1 = 0.0331, wR2 = 0.0874                                                                              |
| Largest diff. peak and hole                   | 0.205 and -0.273 e·Å <sup>-3</sup>                                                                     |

## 11. NMR spectra of new compounds.

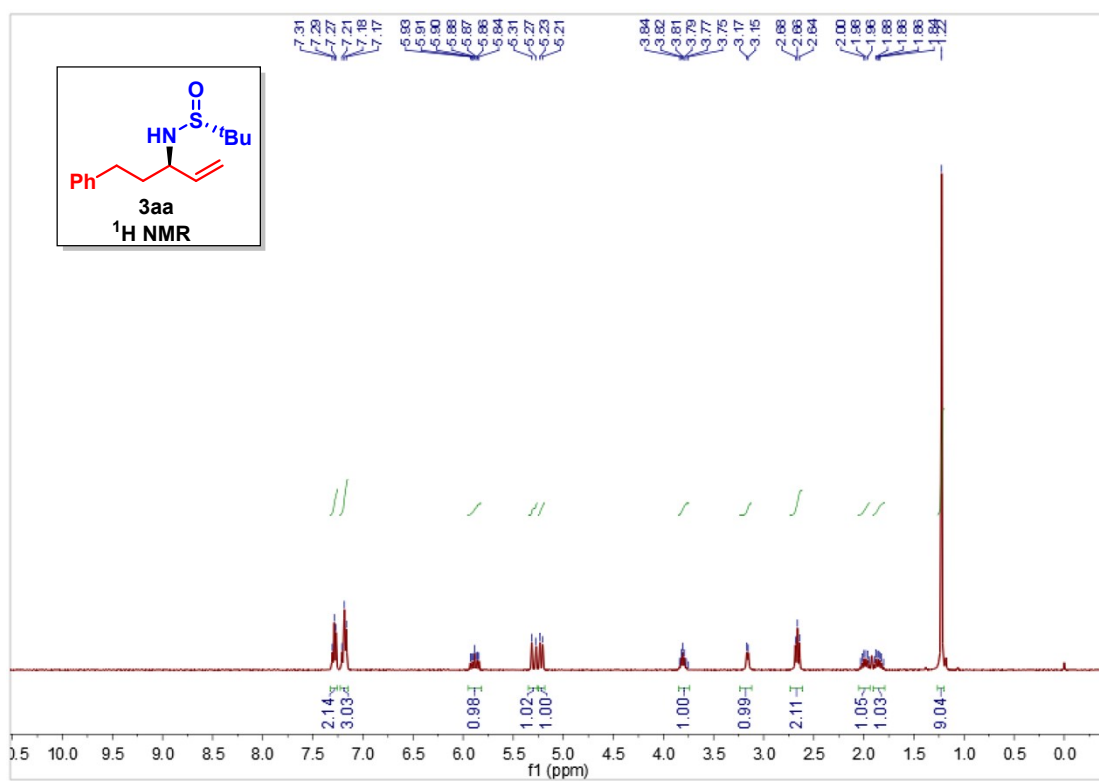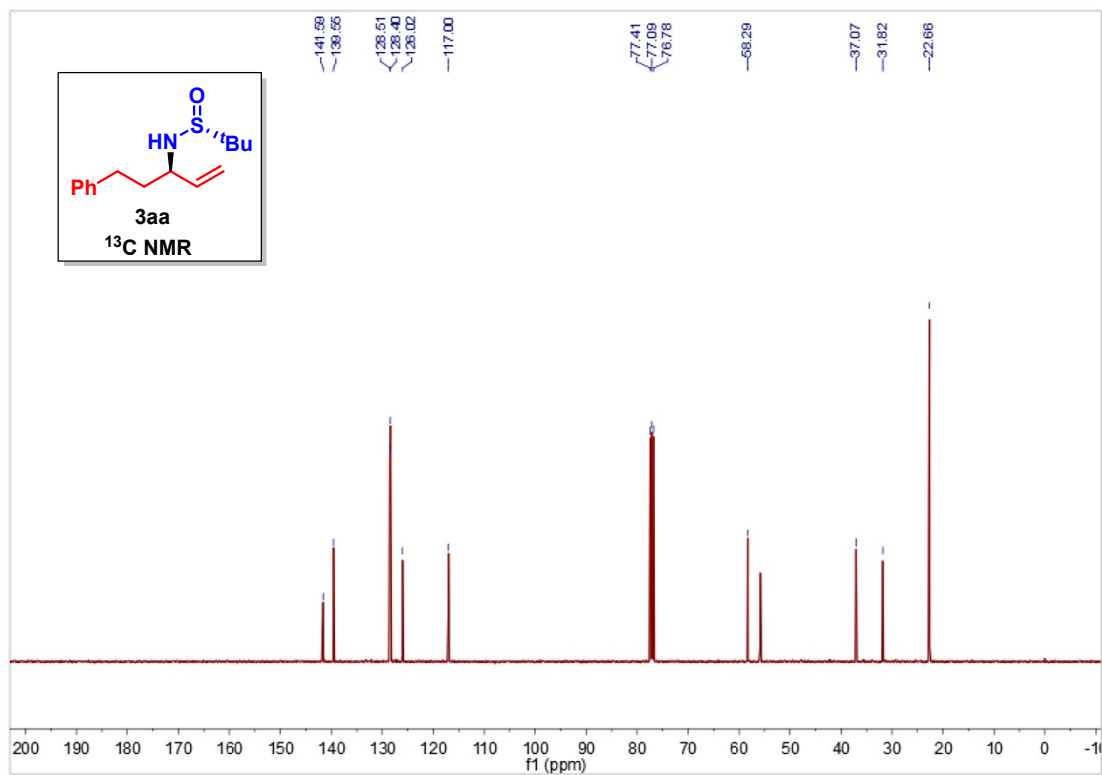



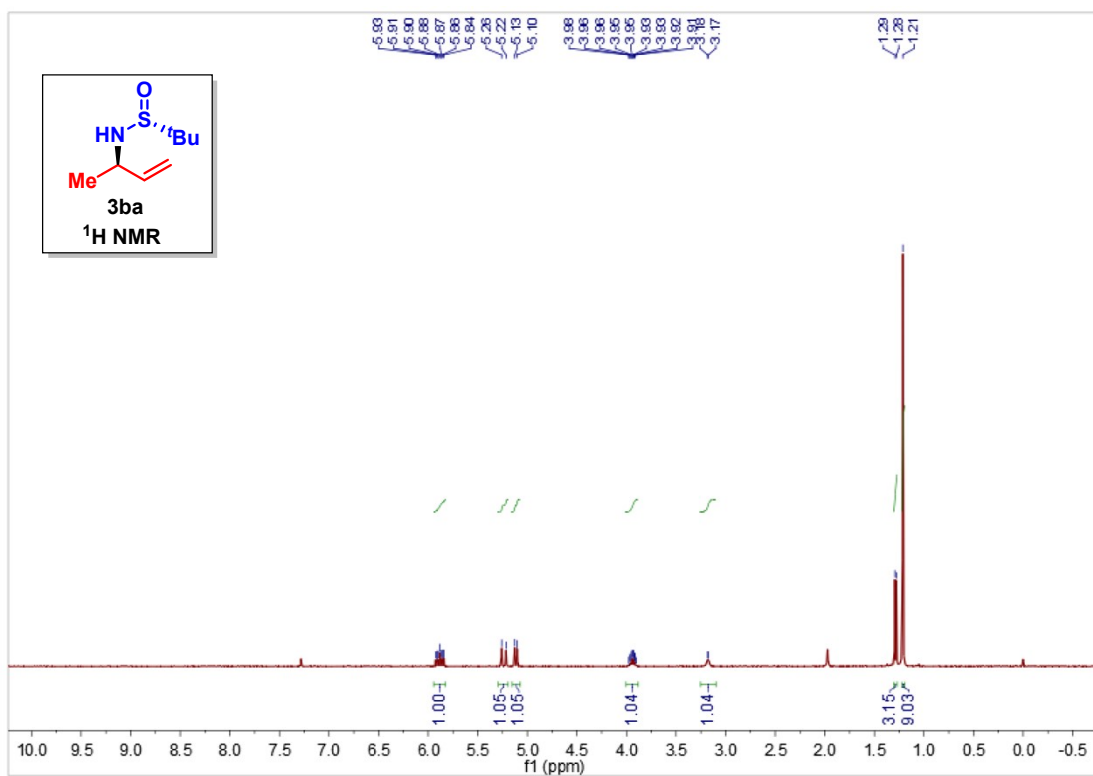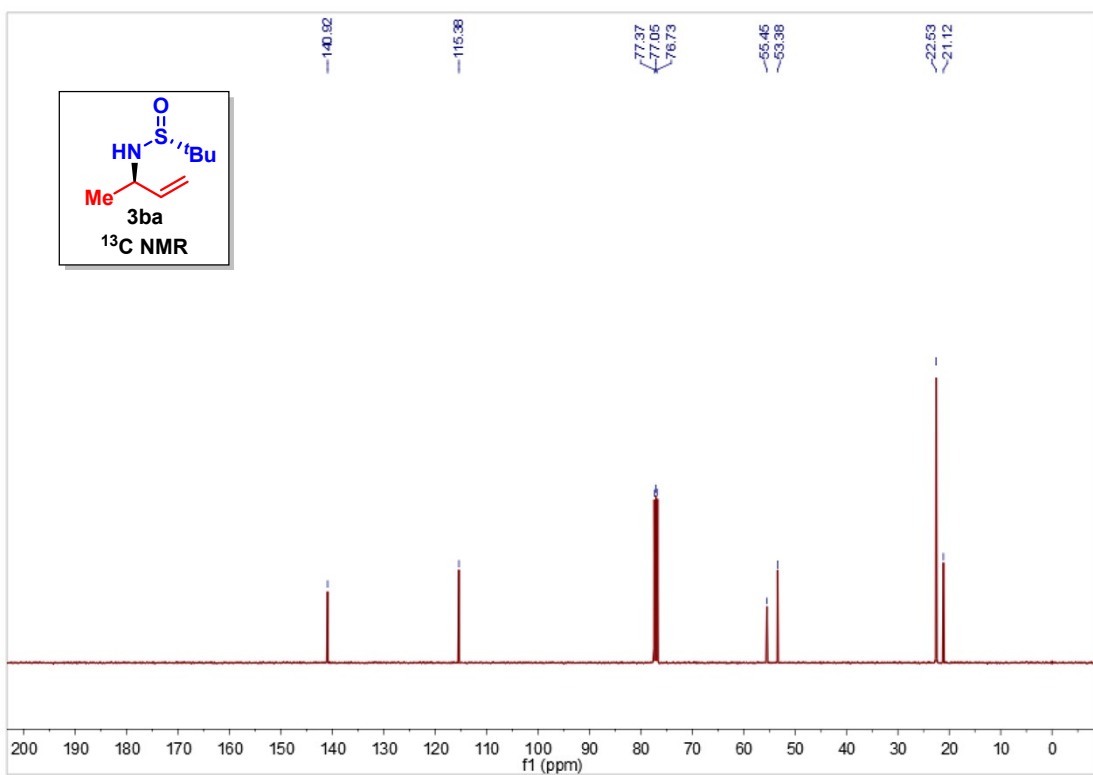

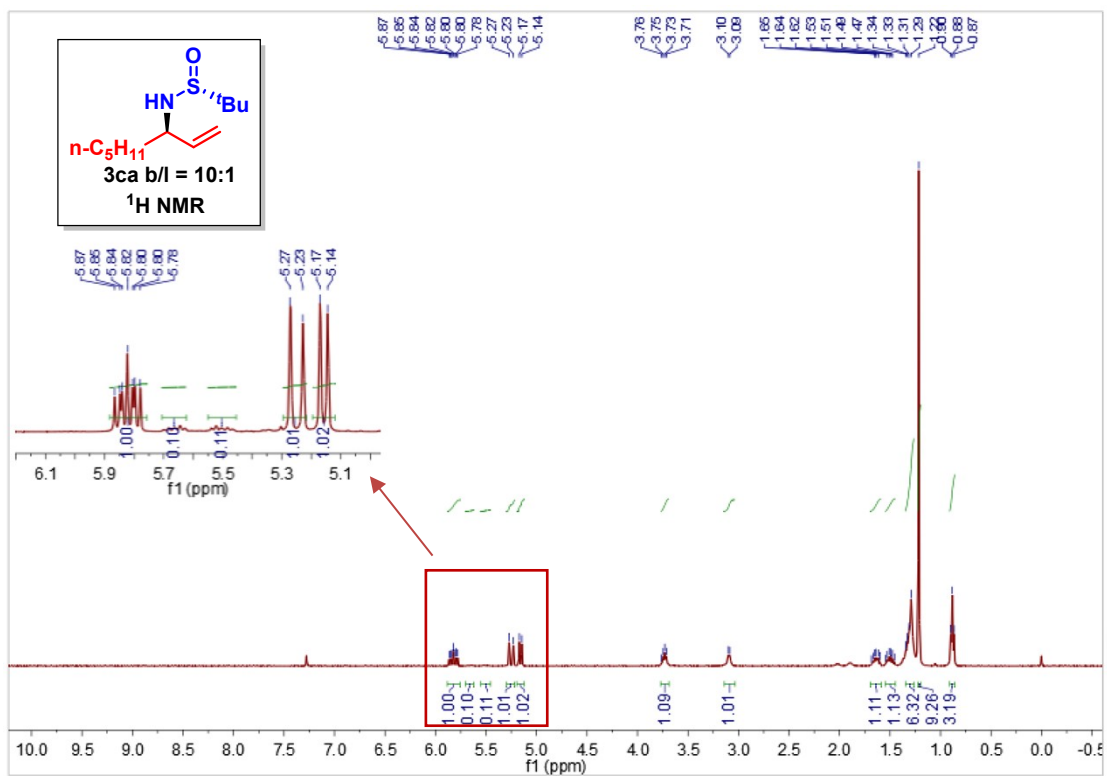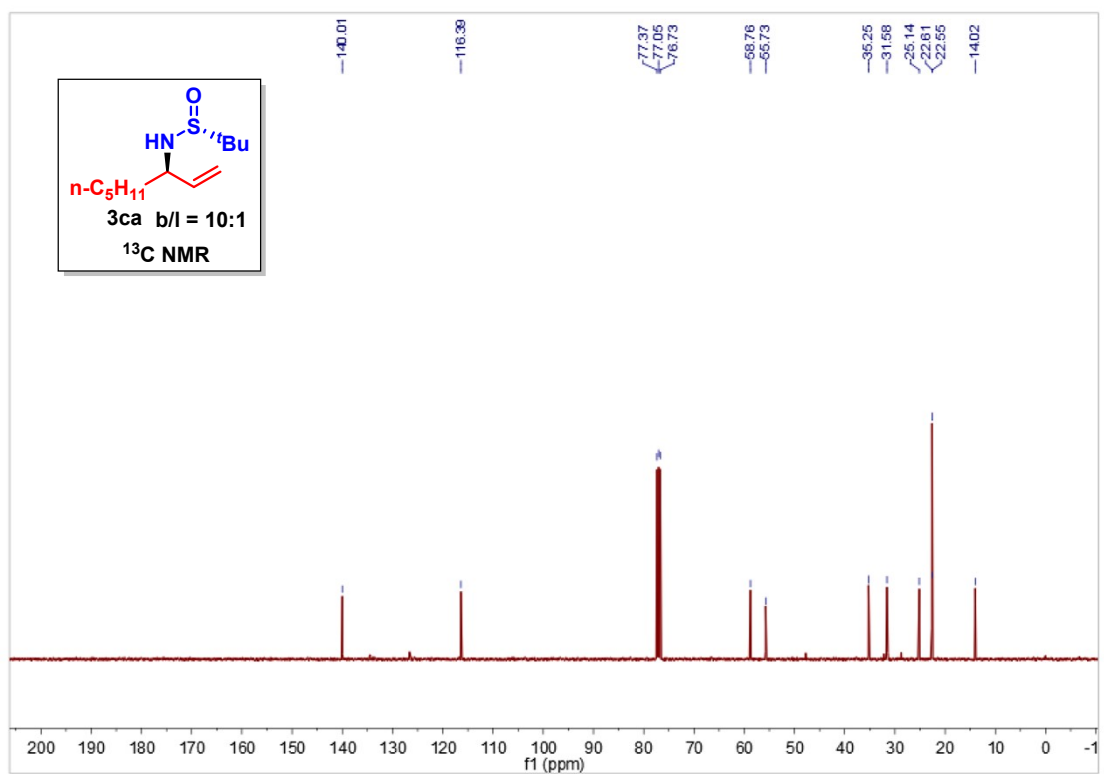

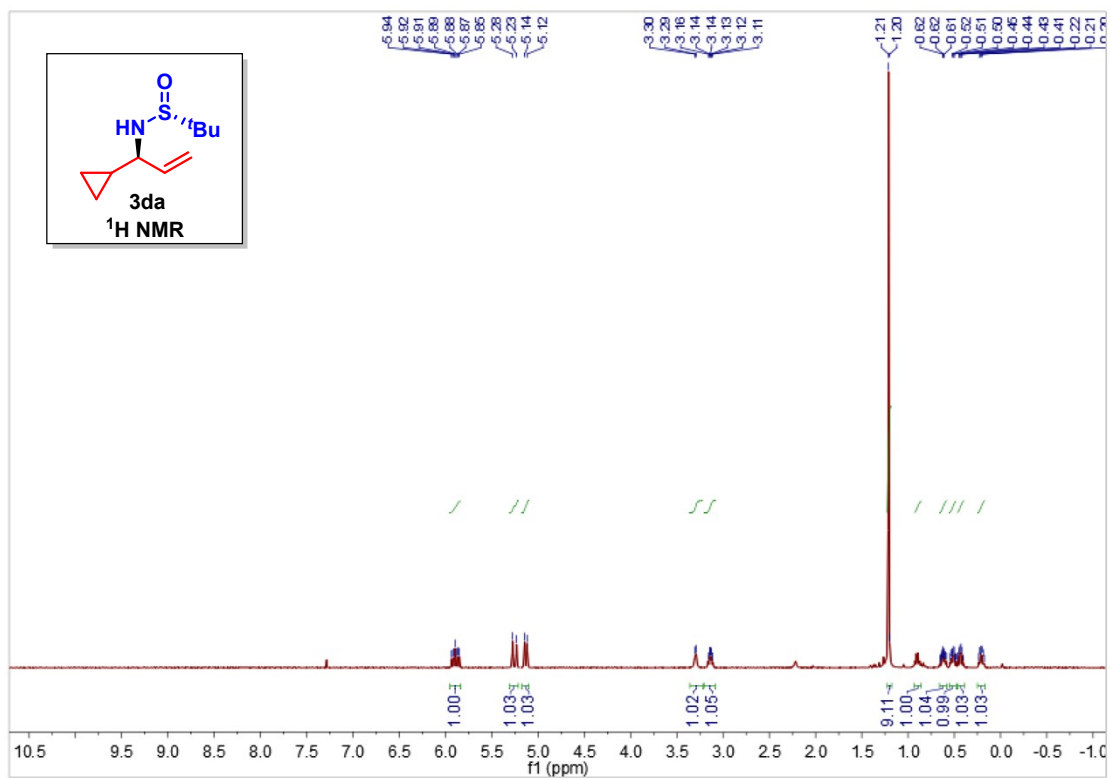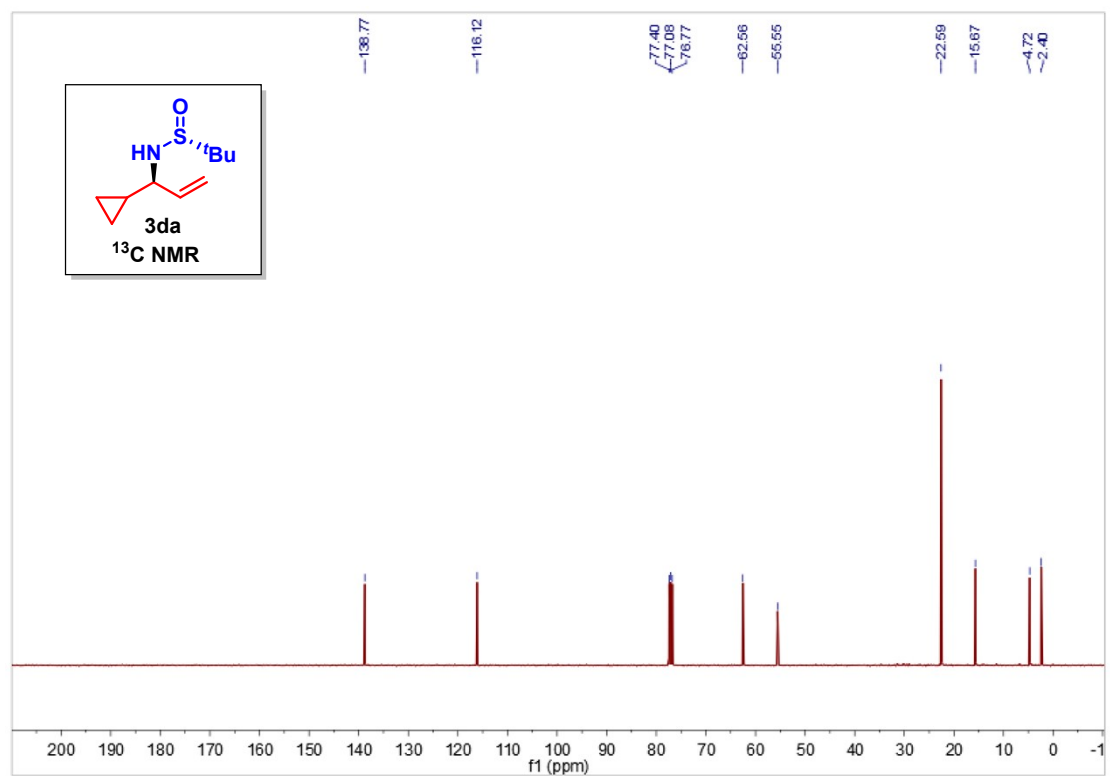

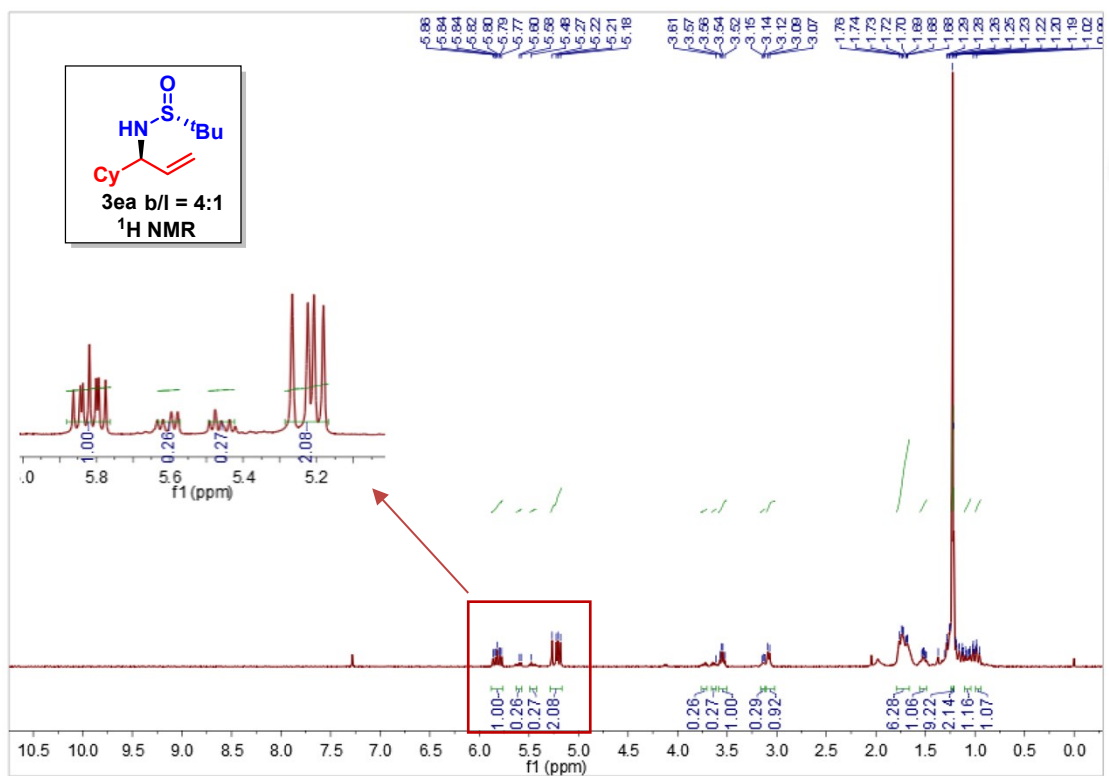

,

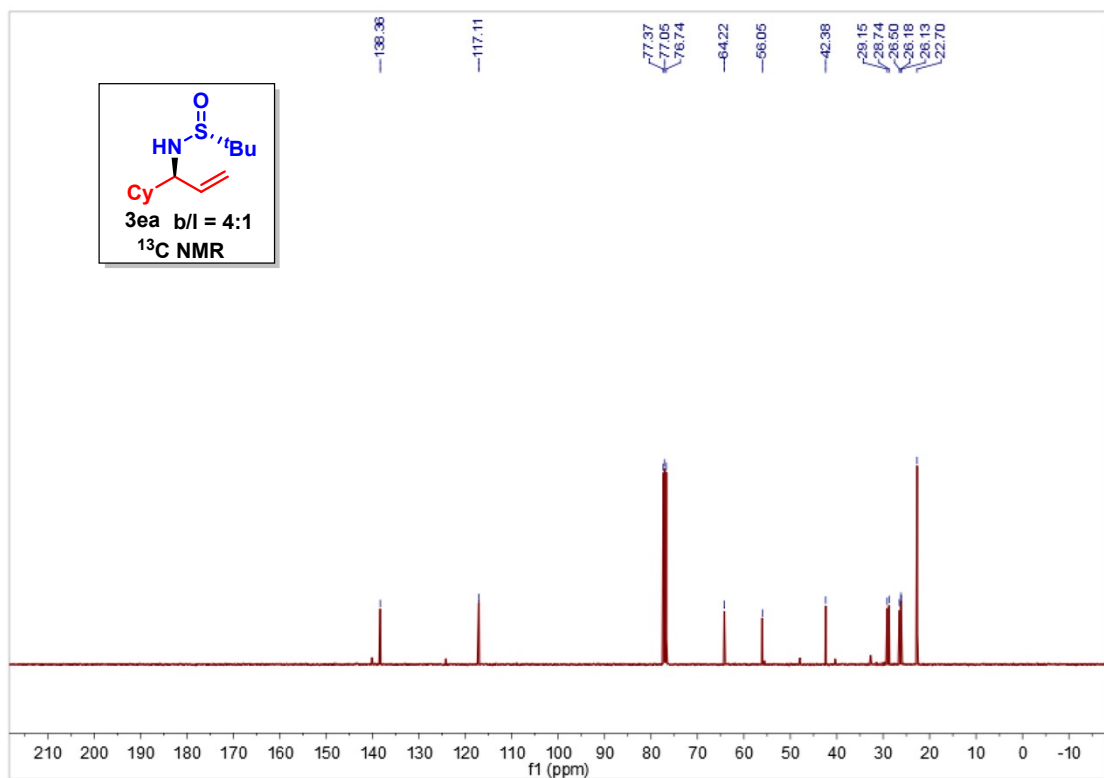

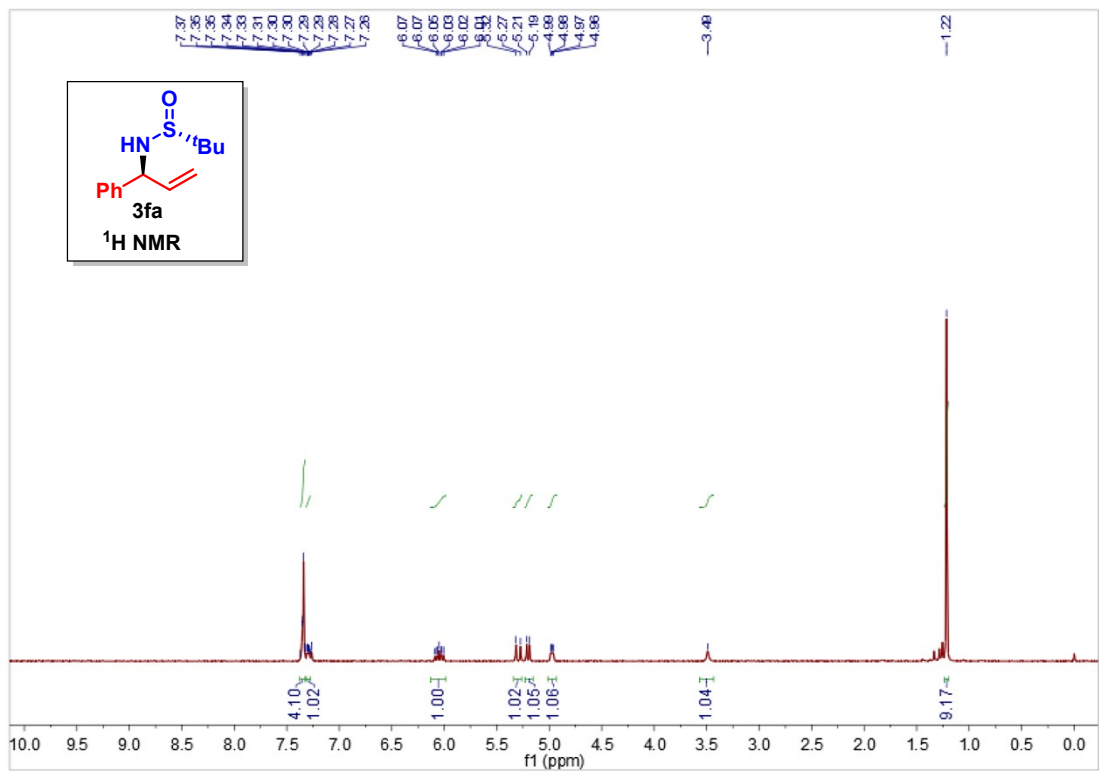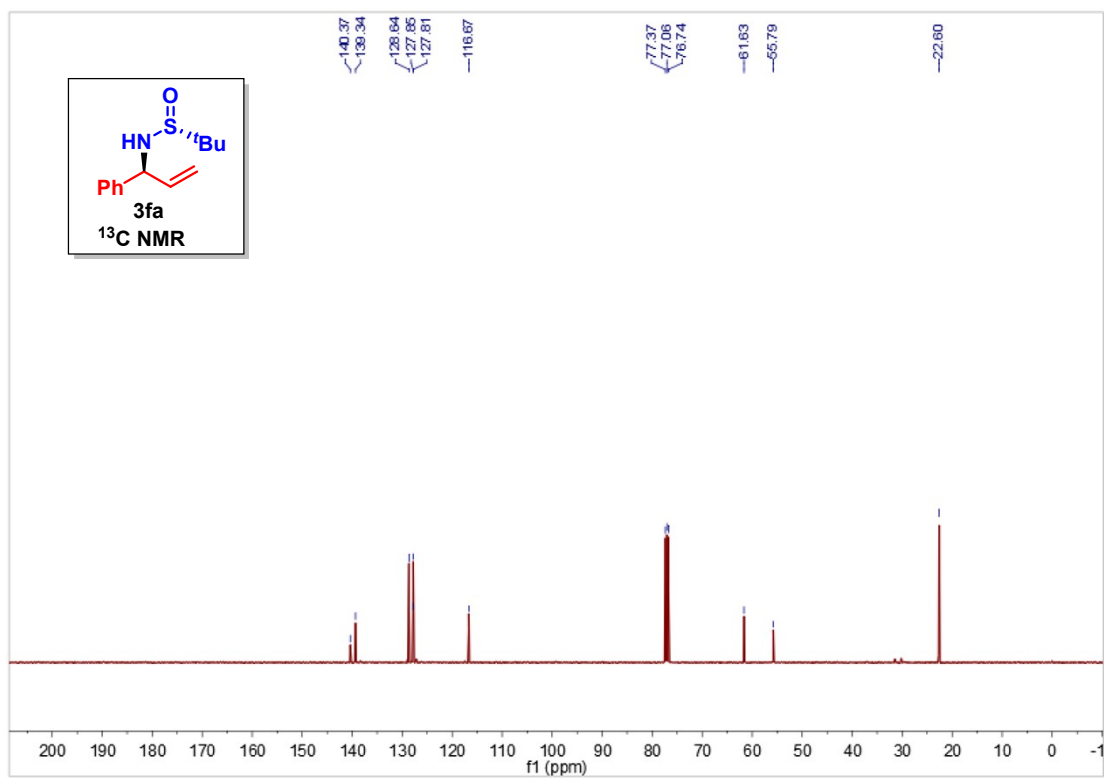

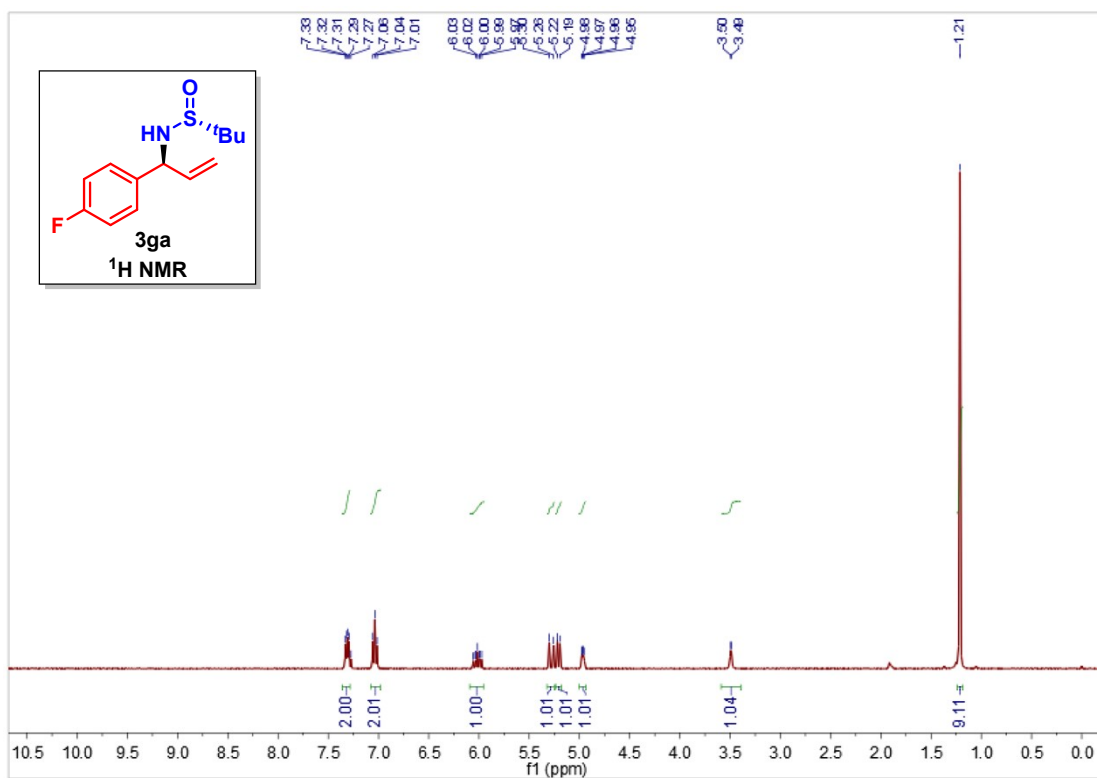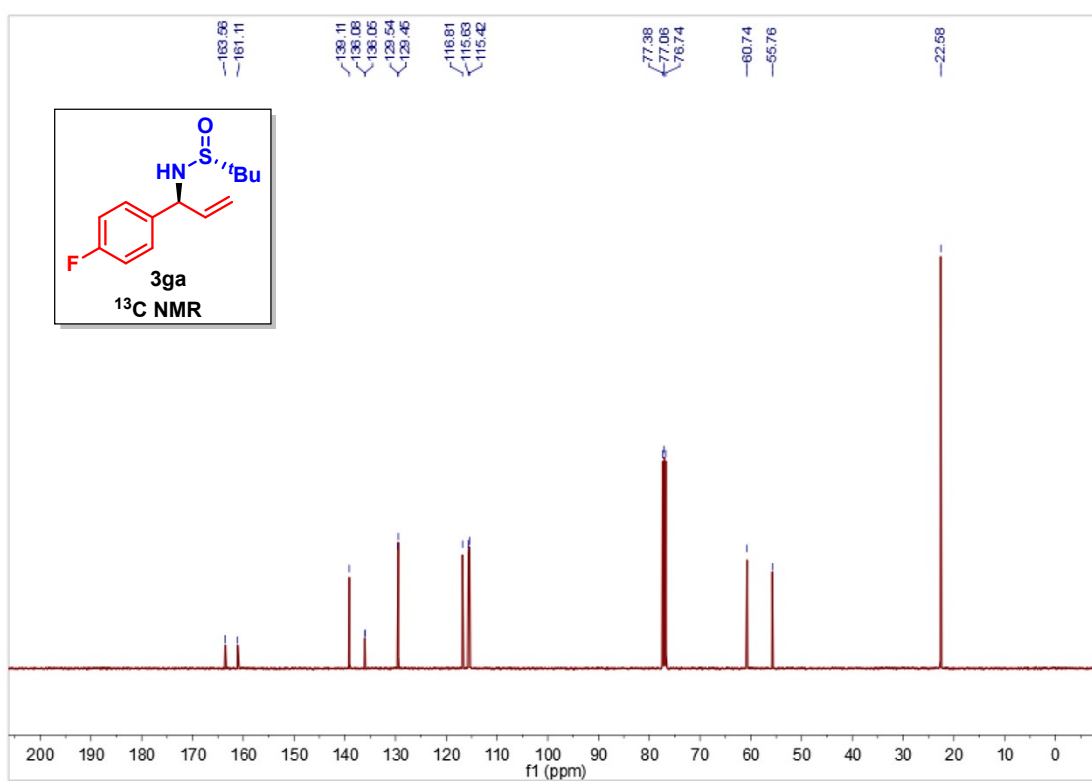

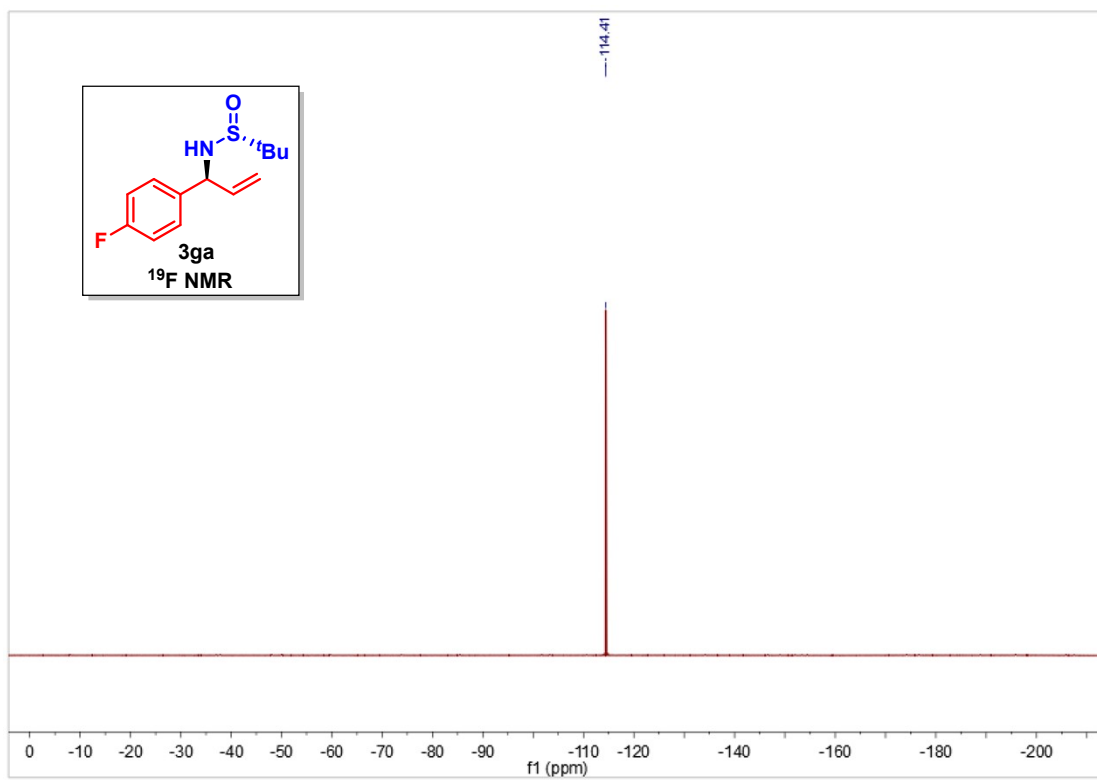

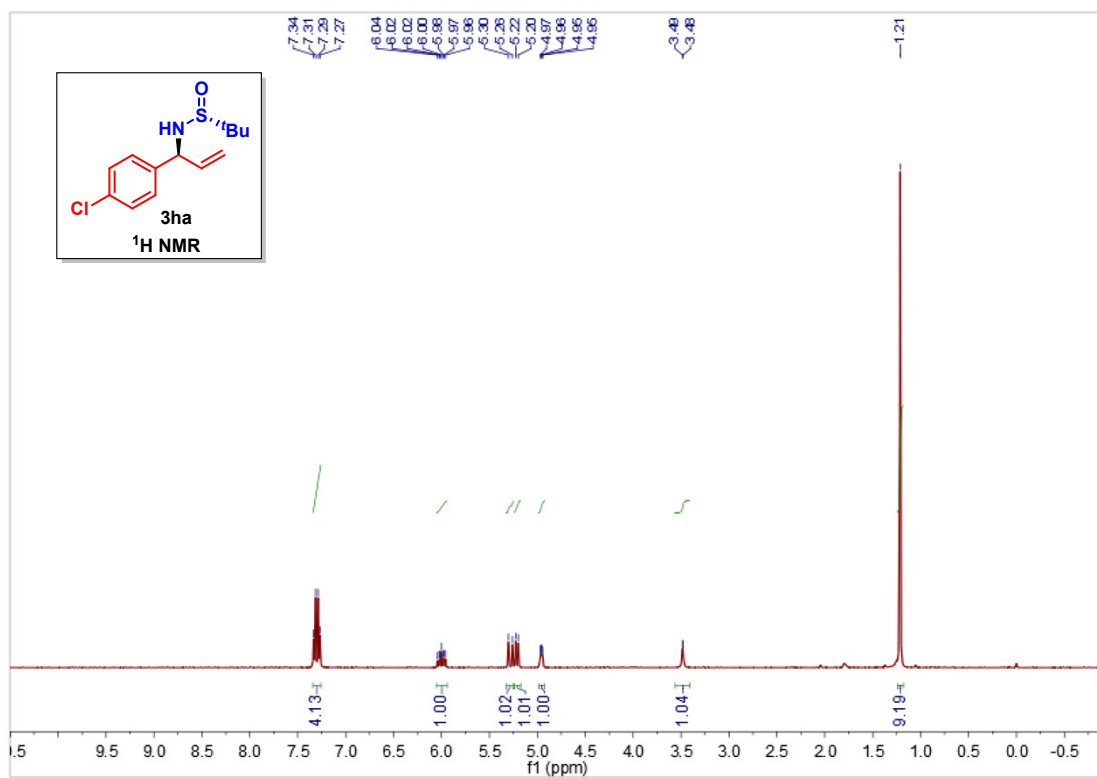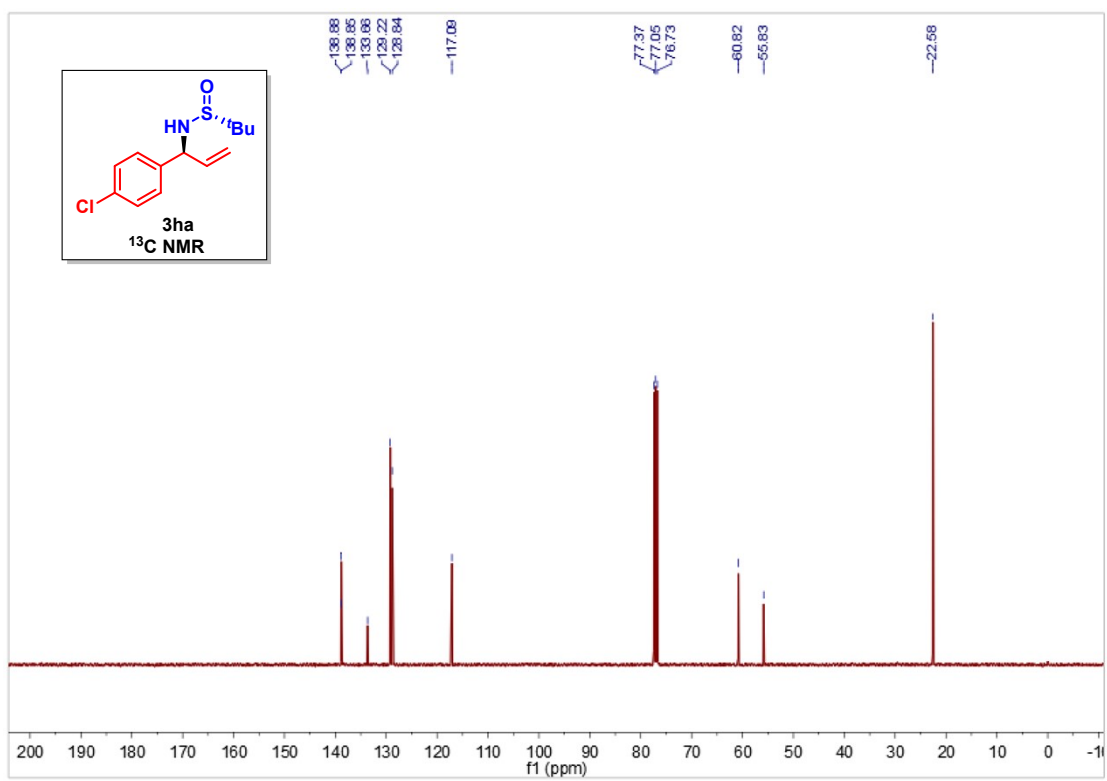



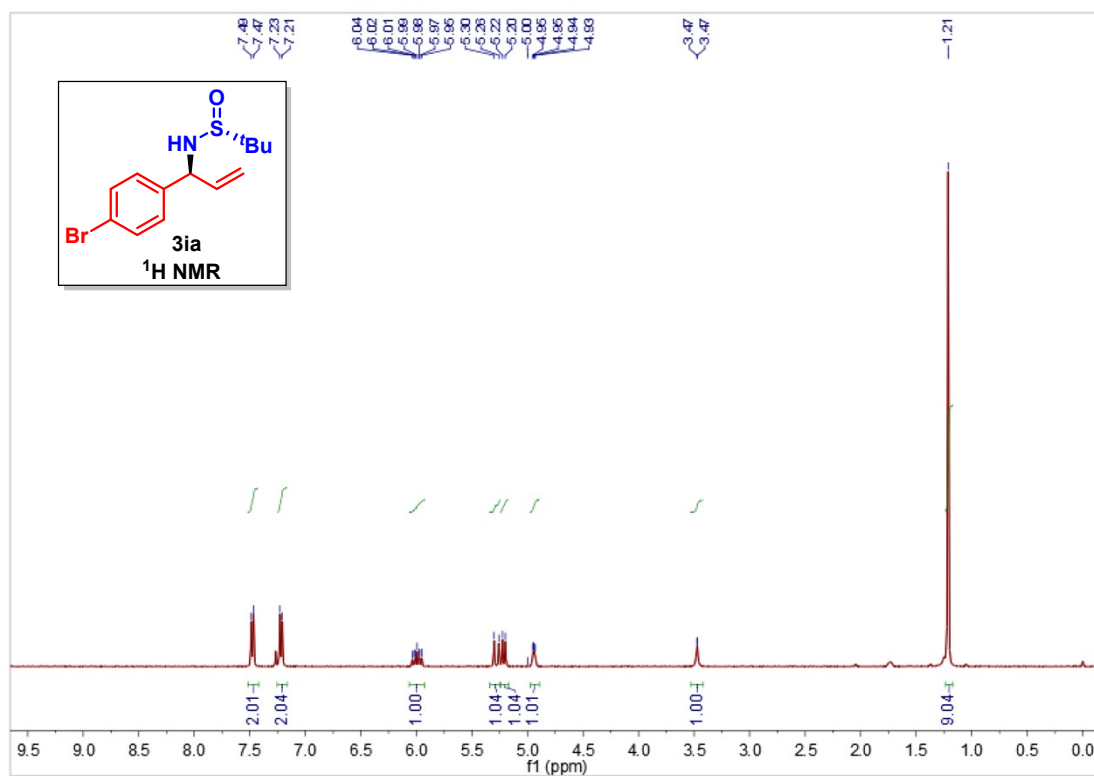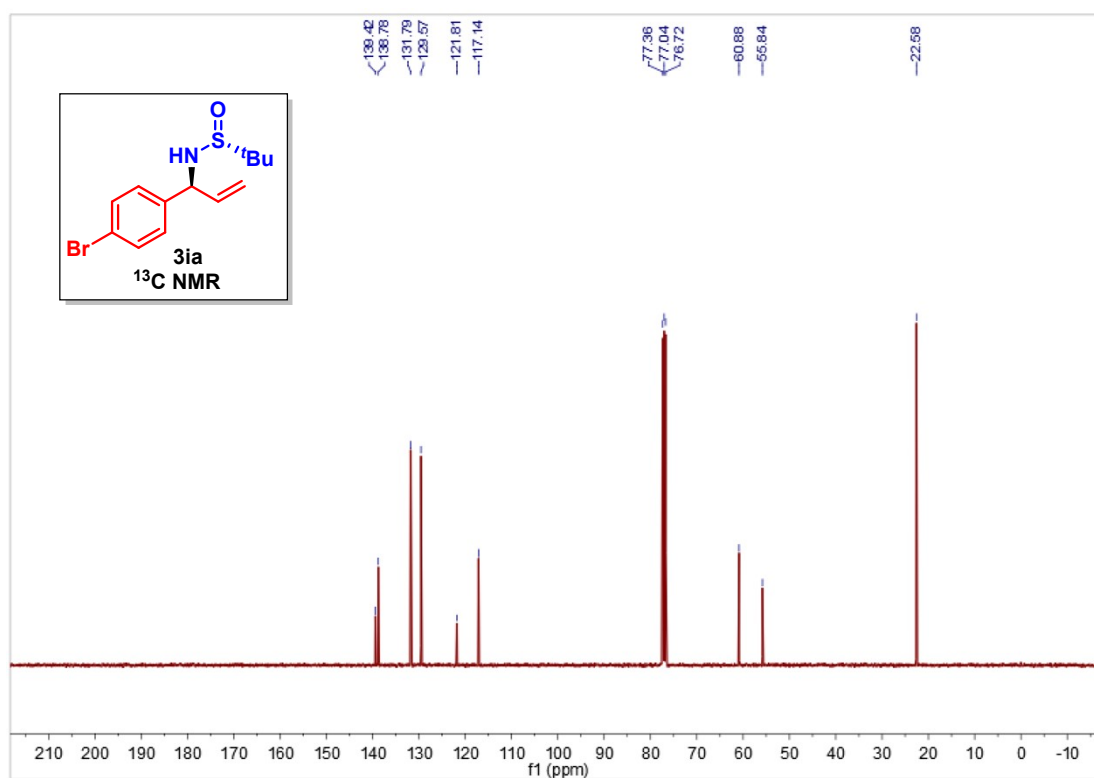

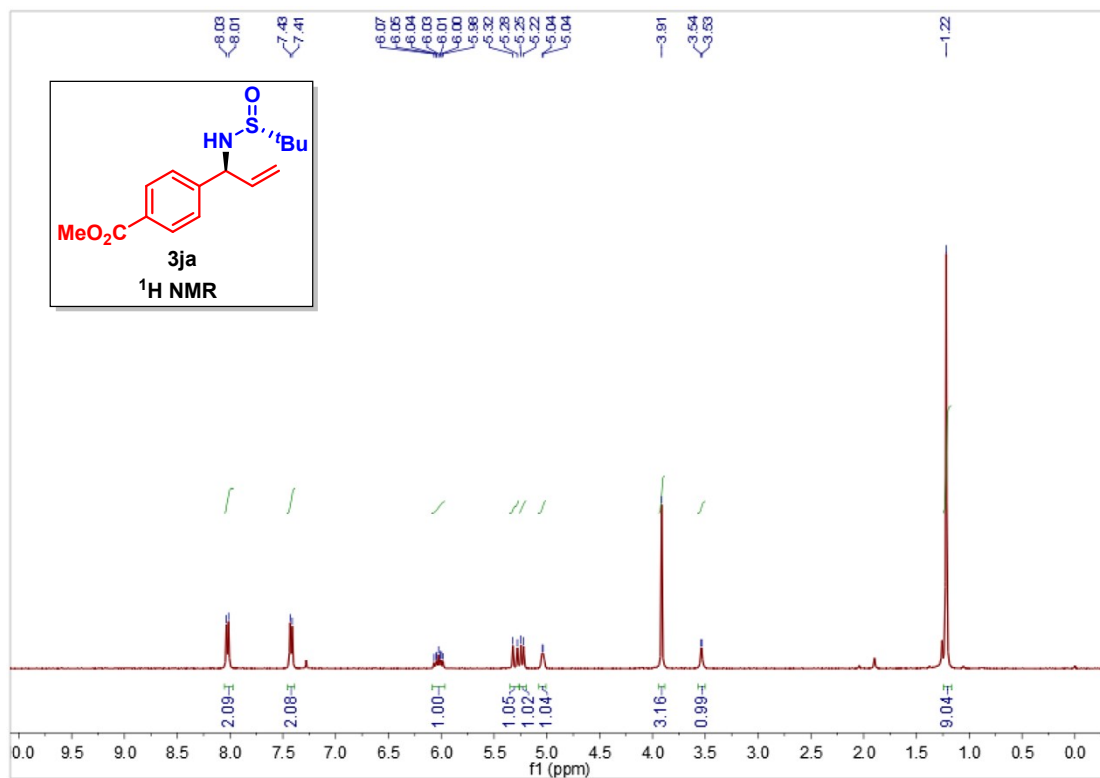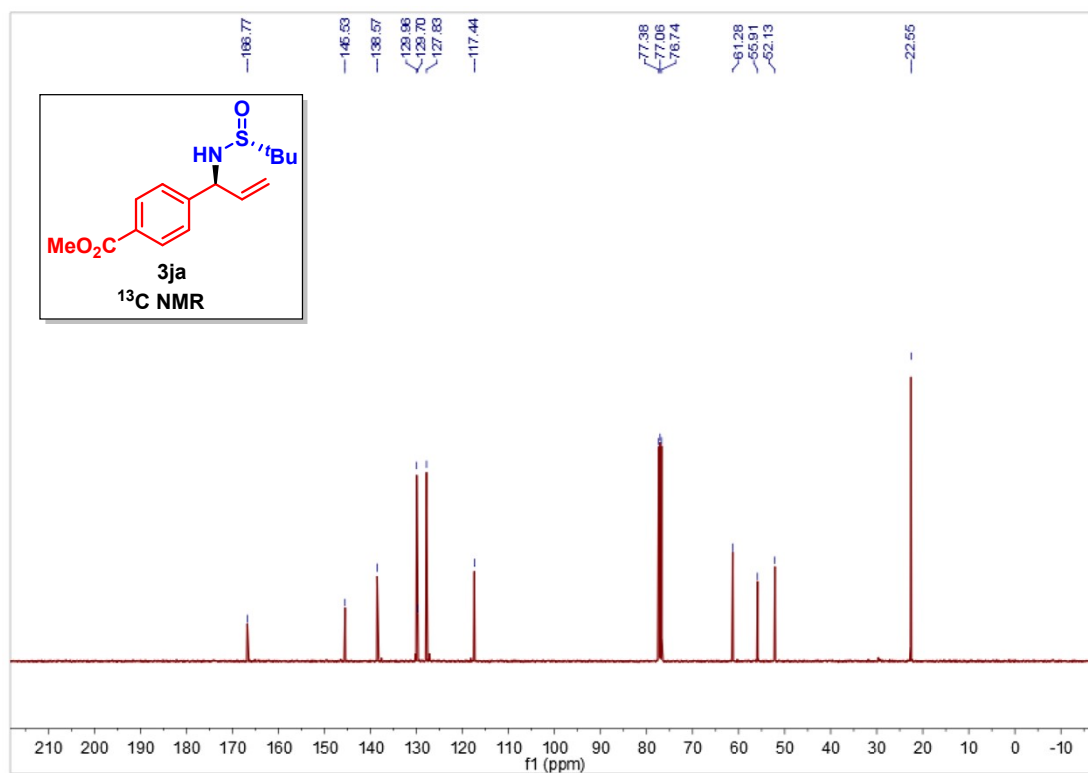

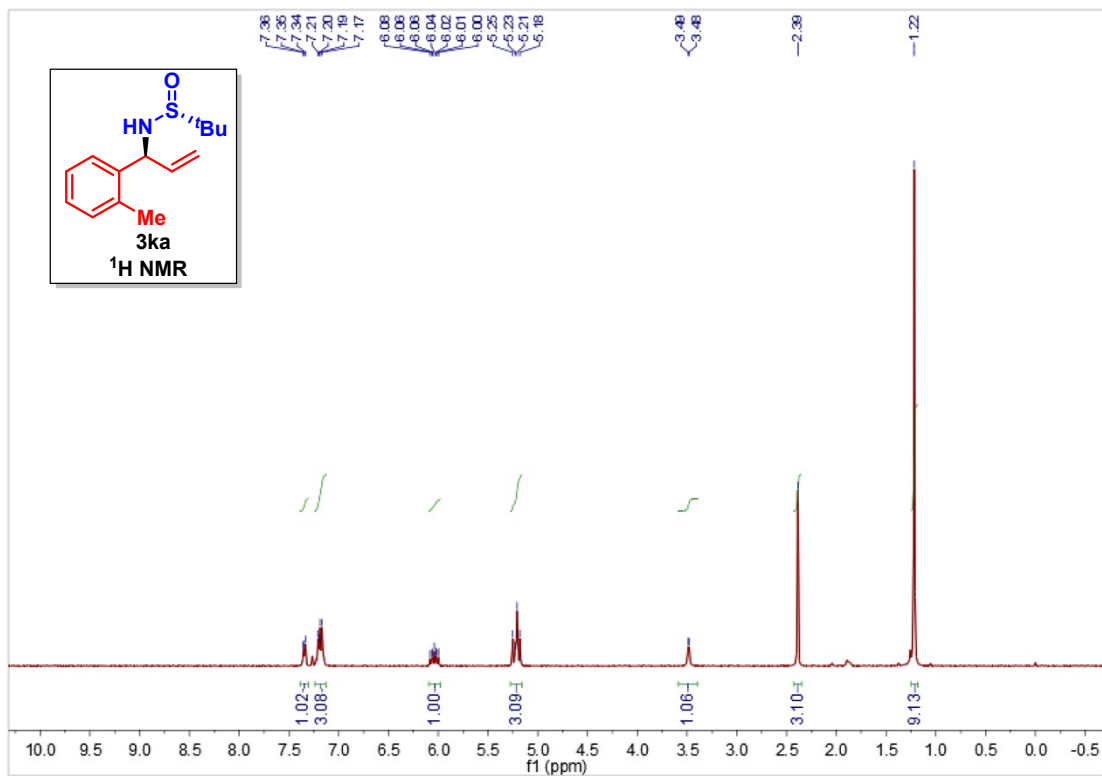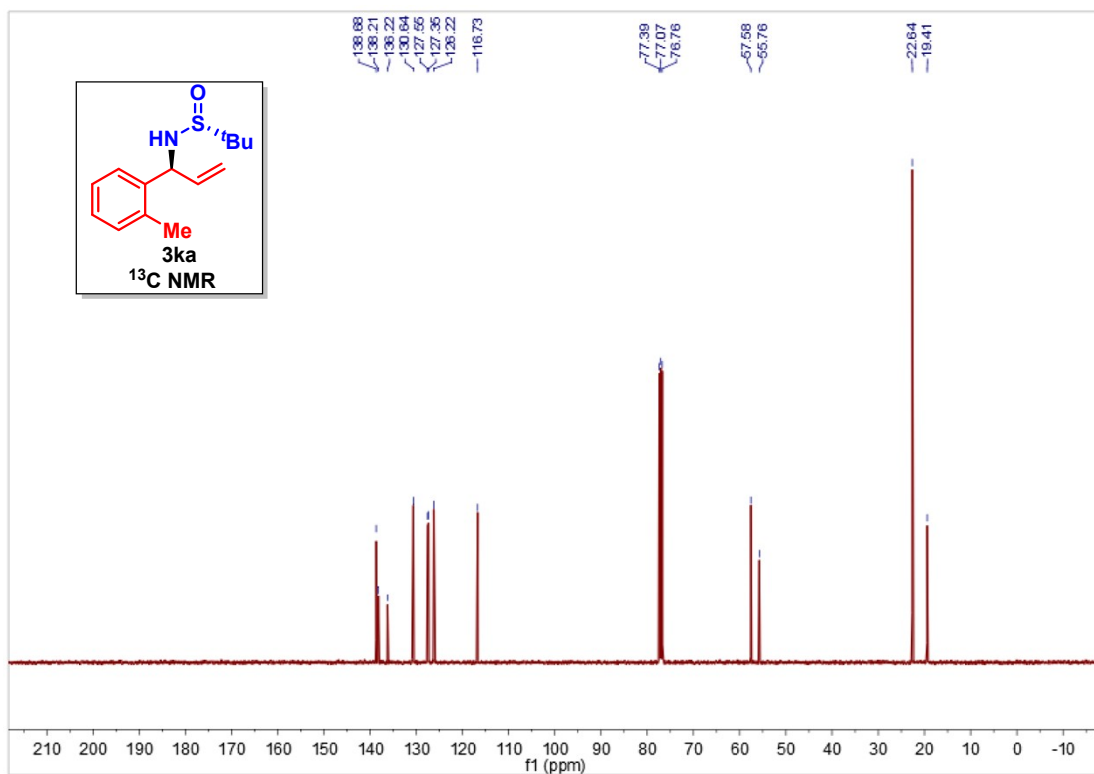

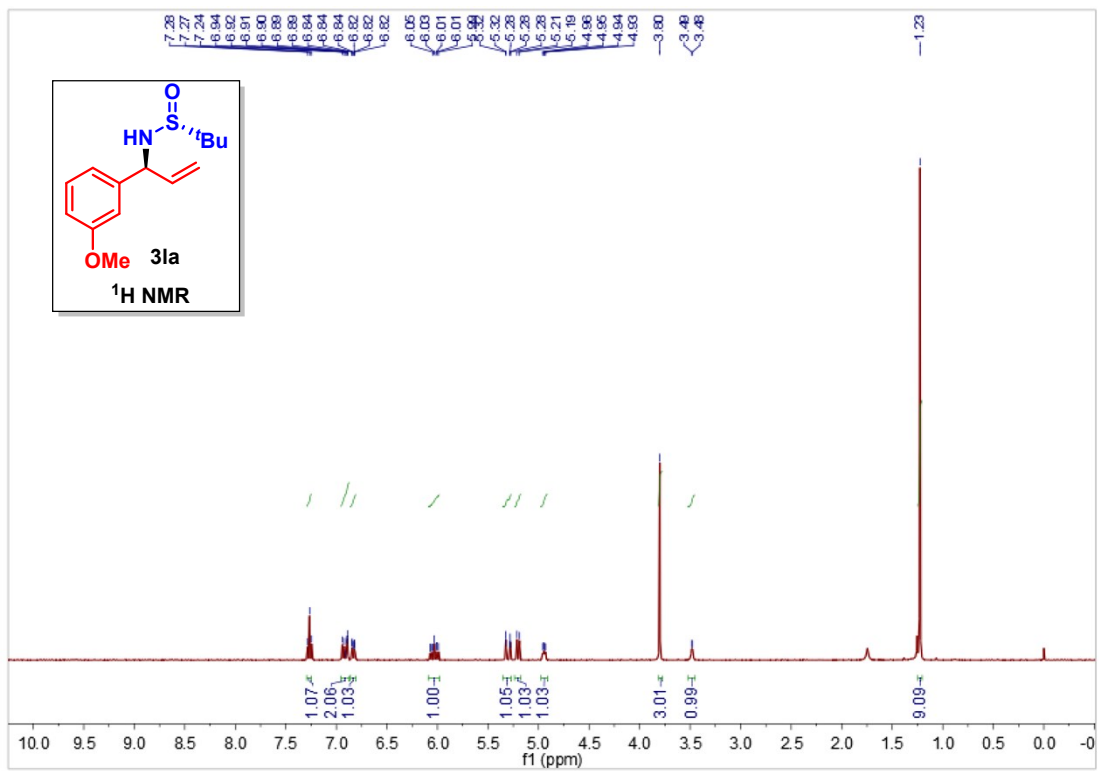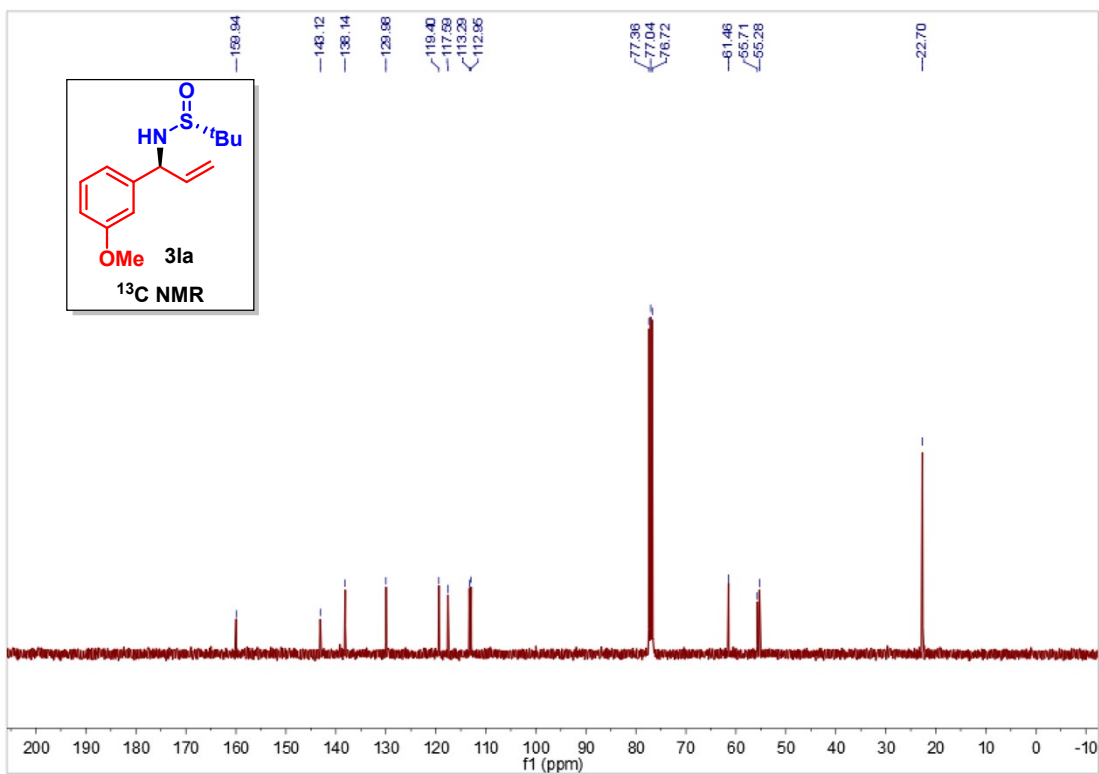

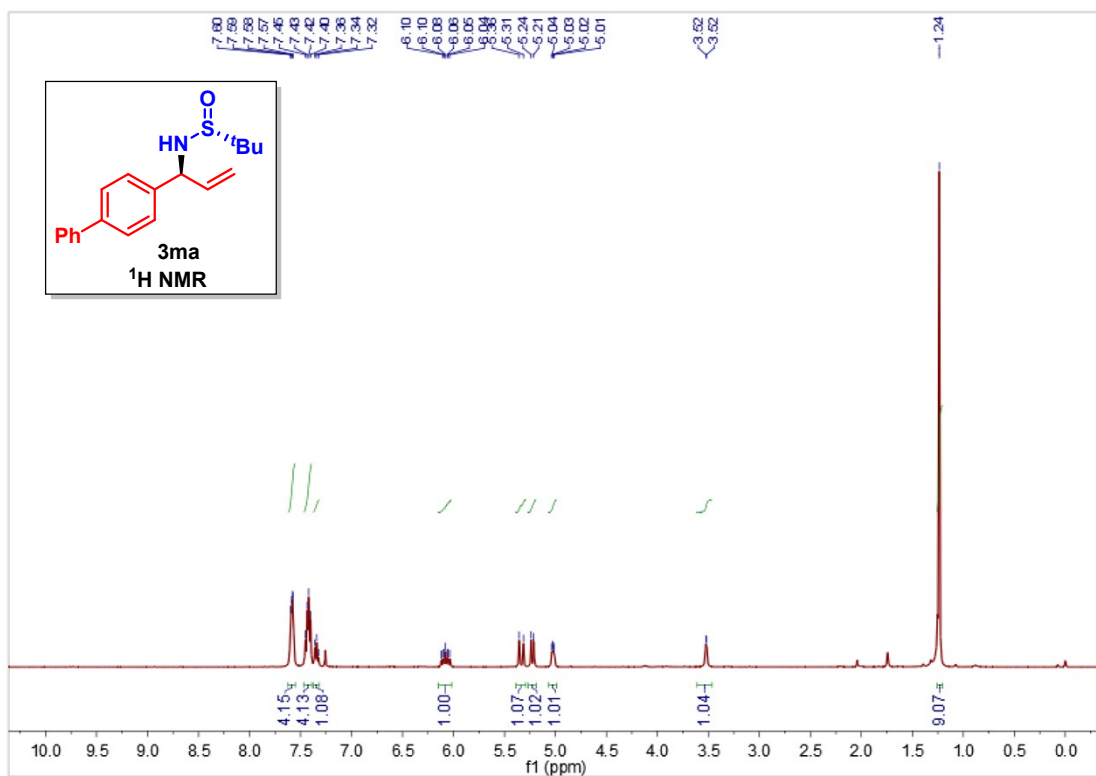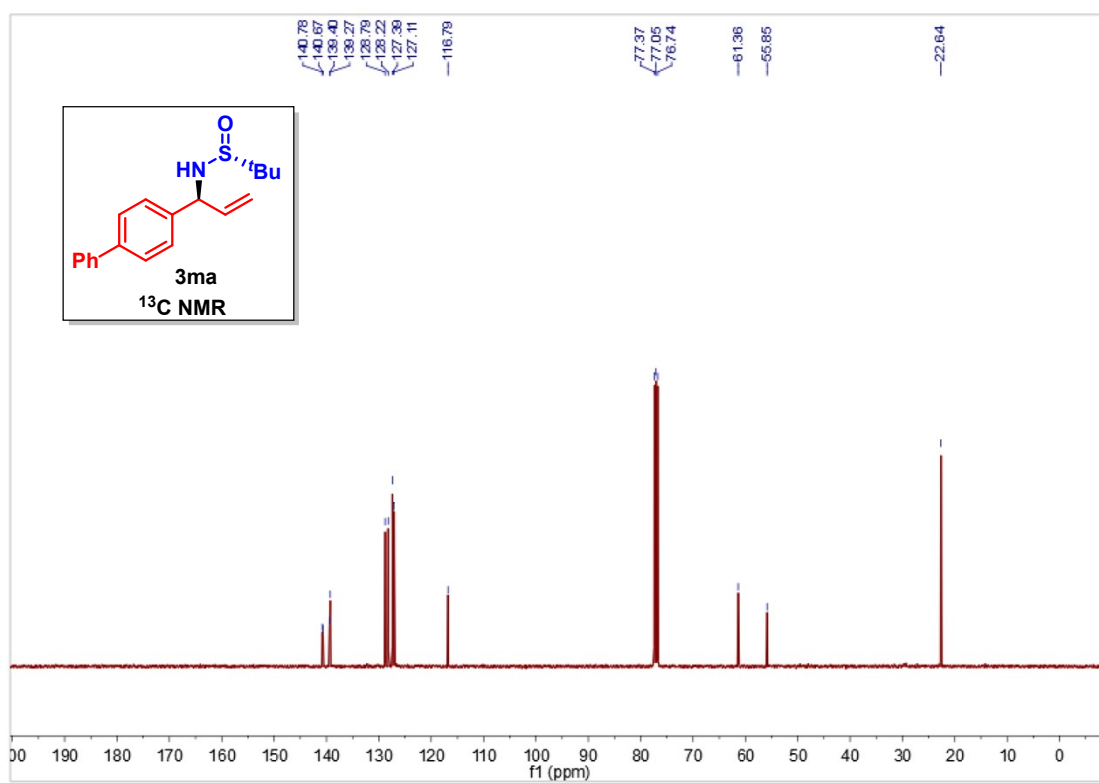

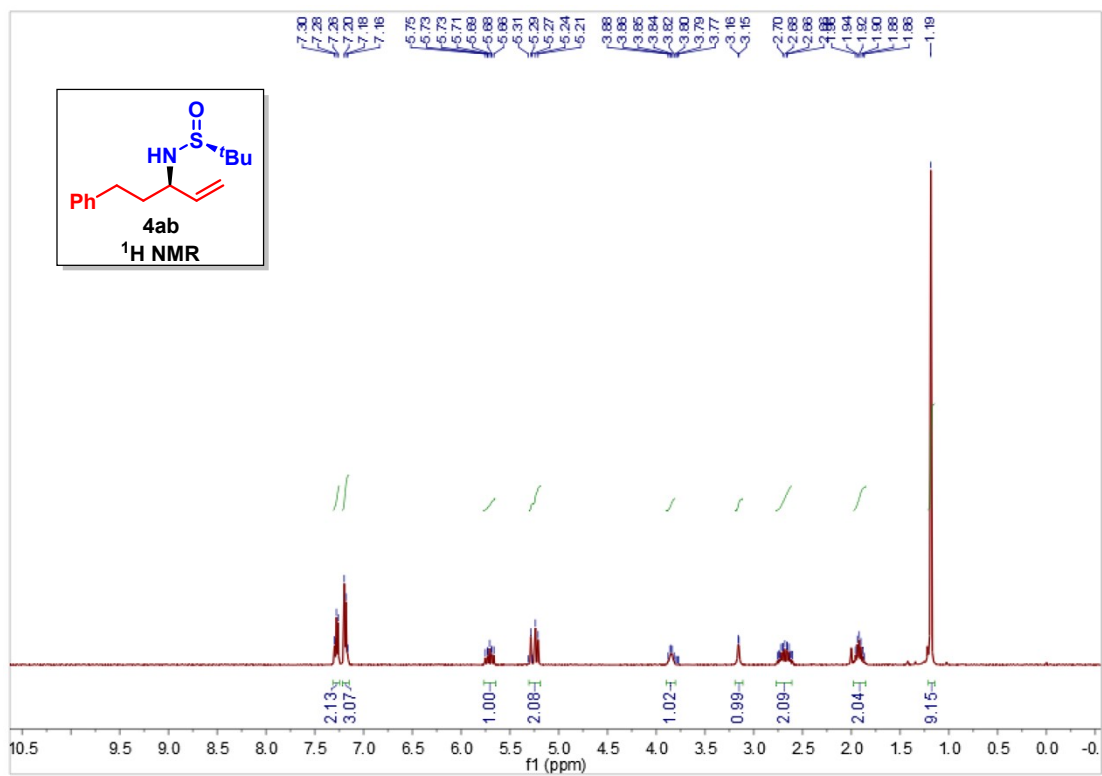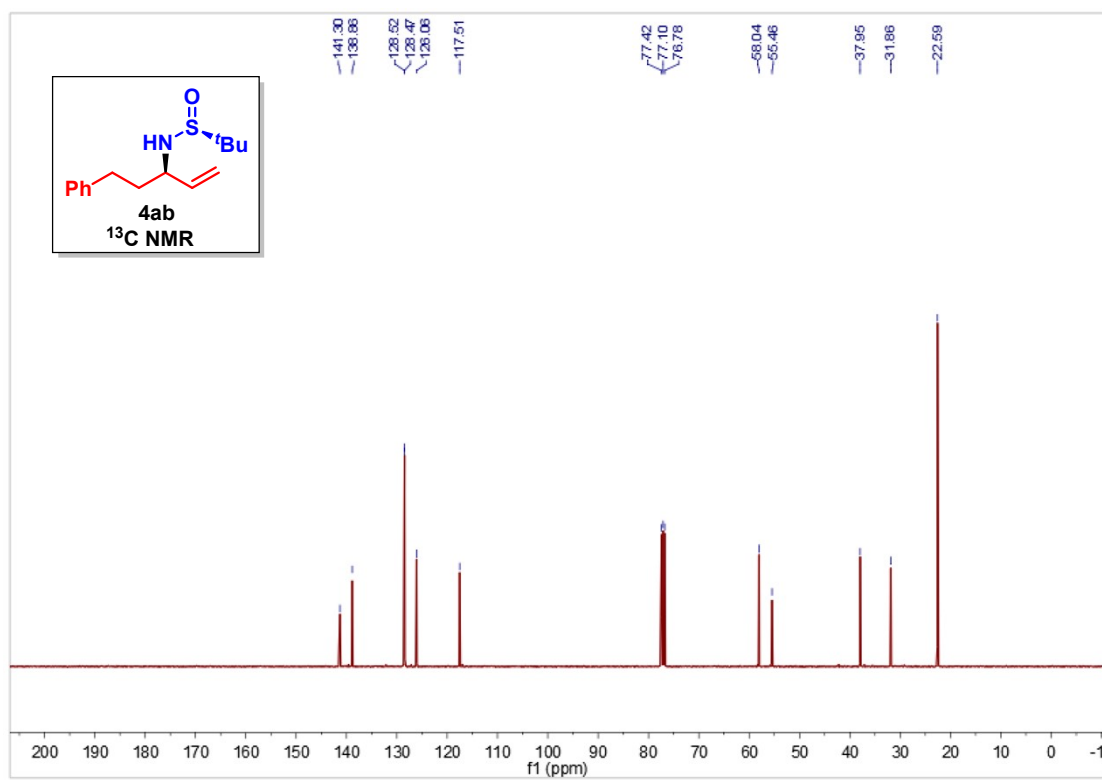

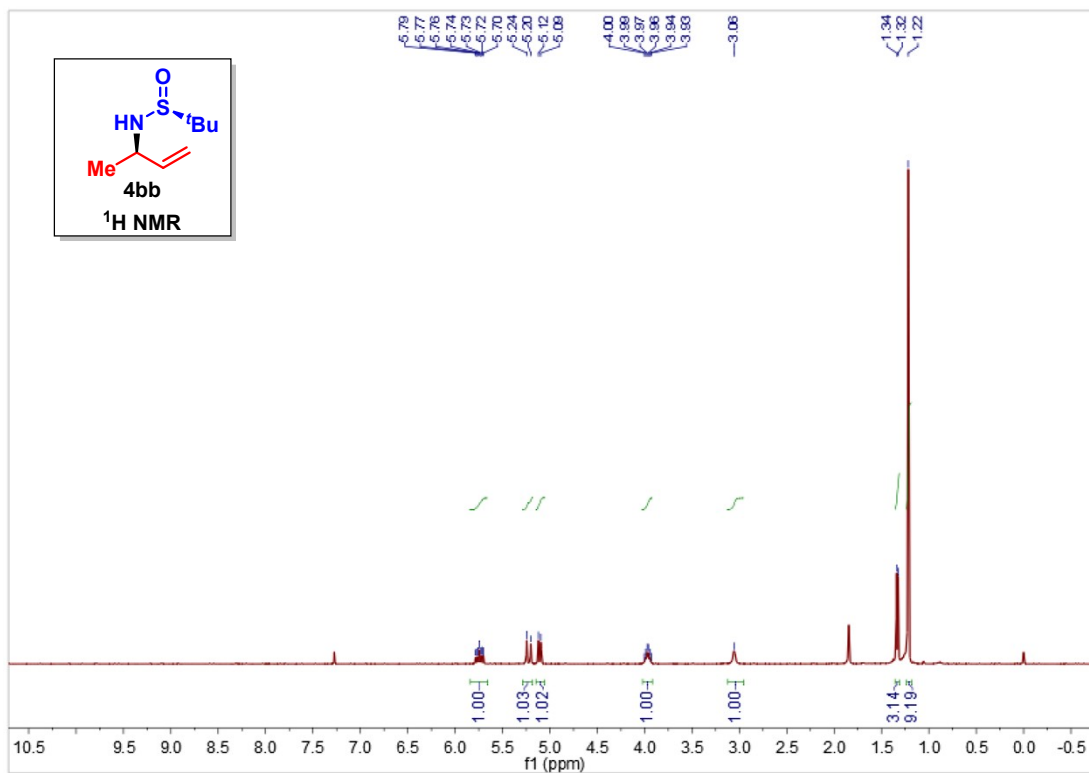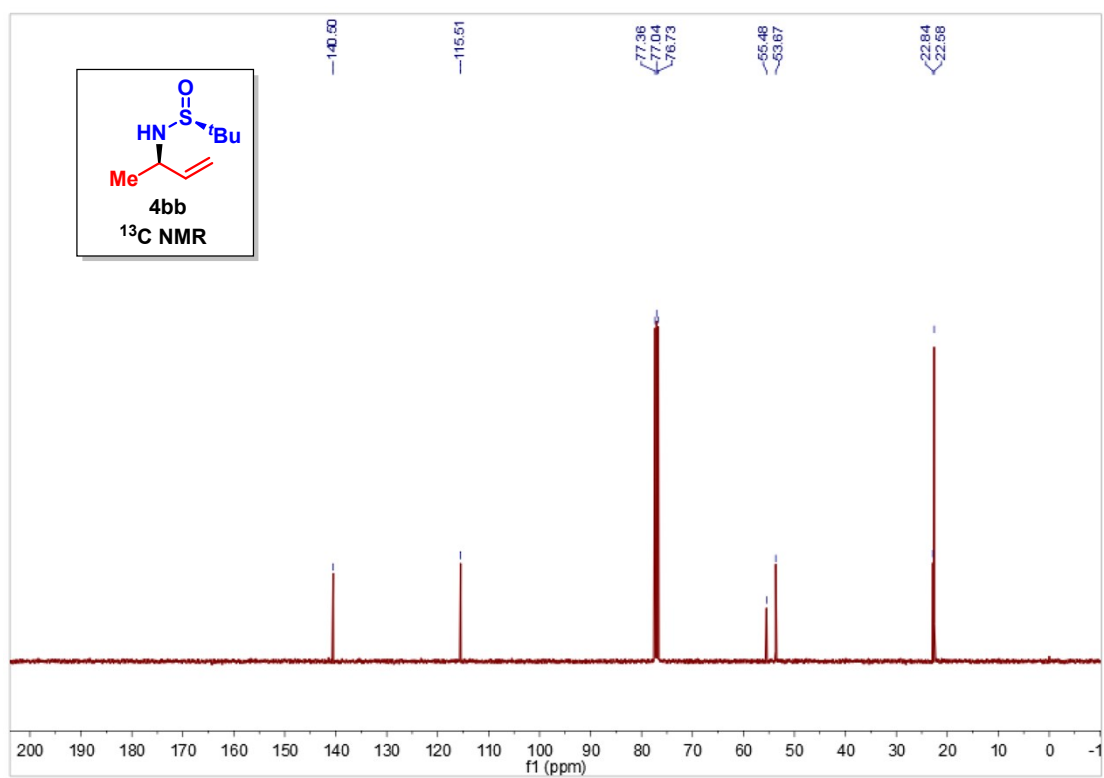

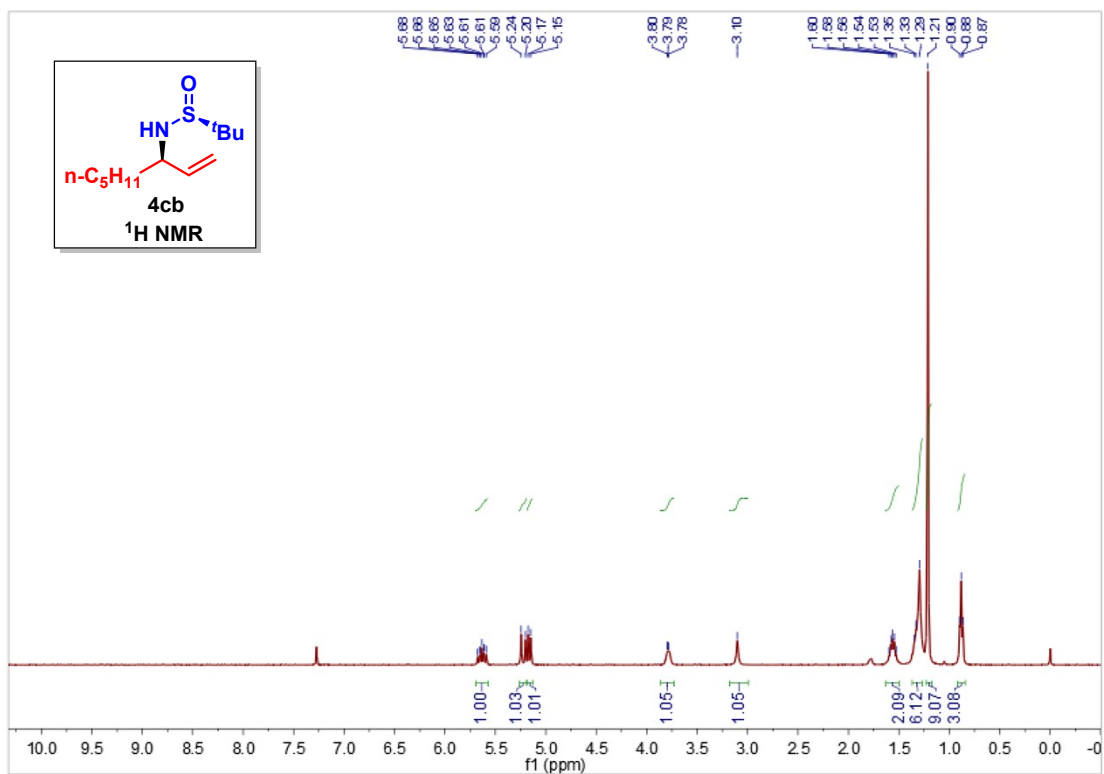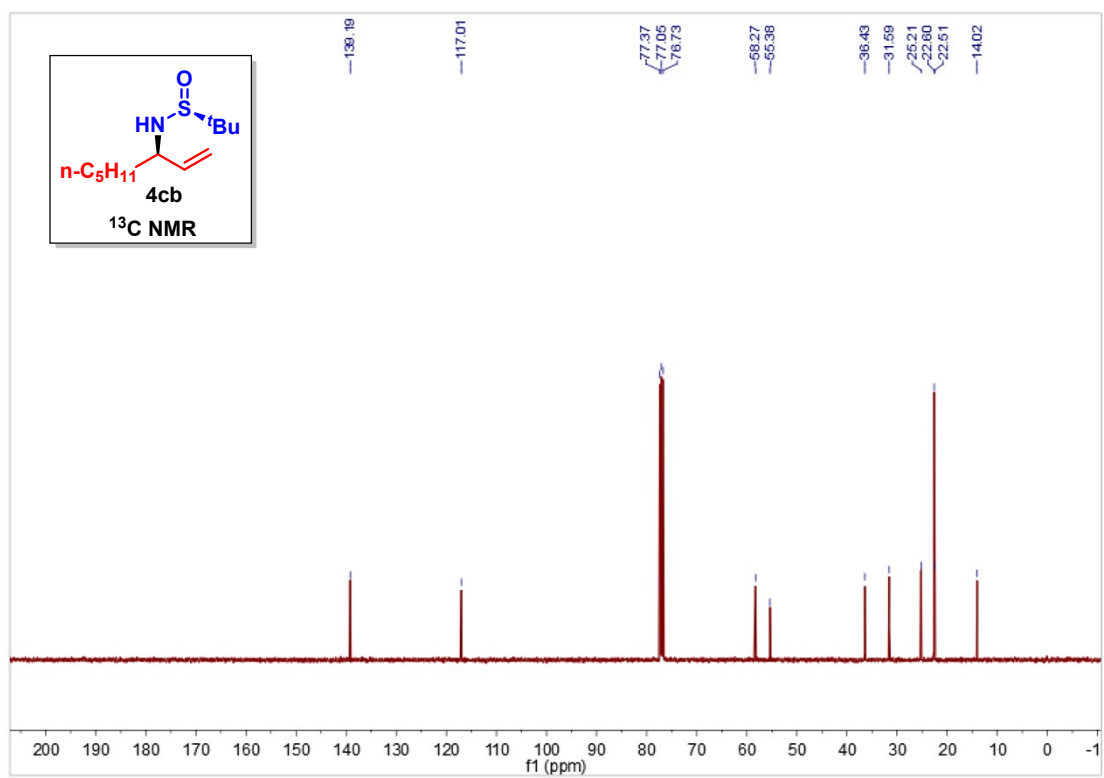



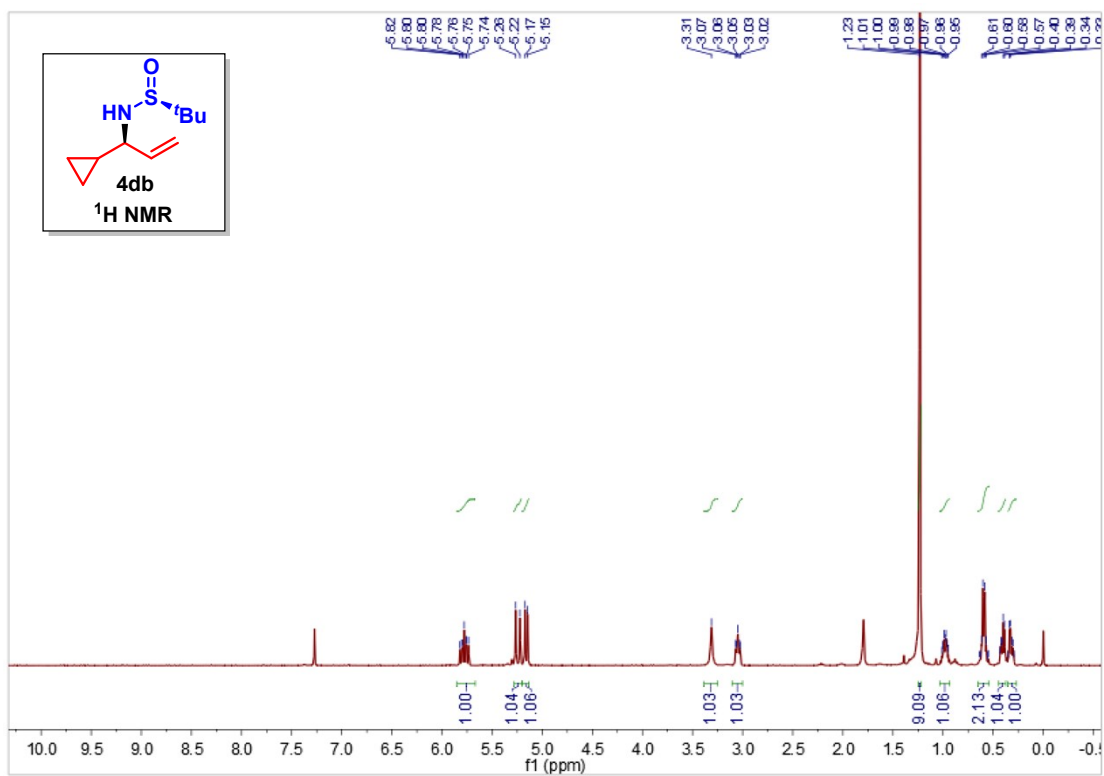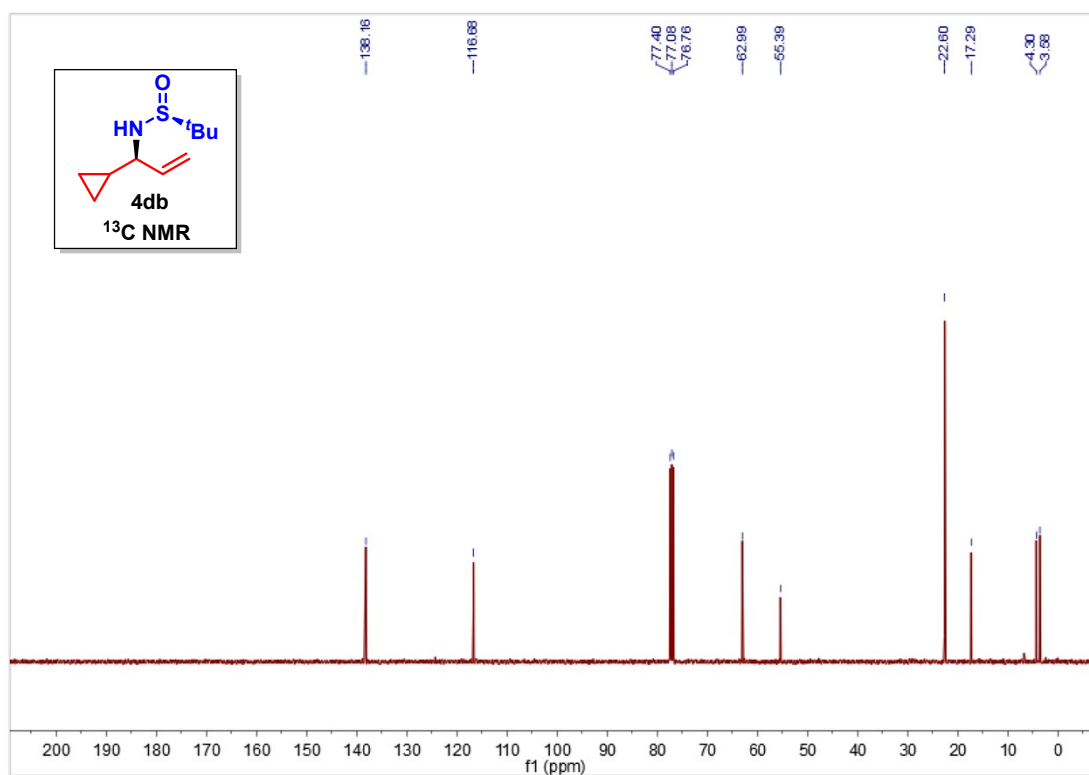

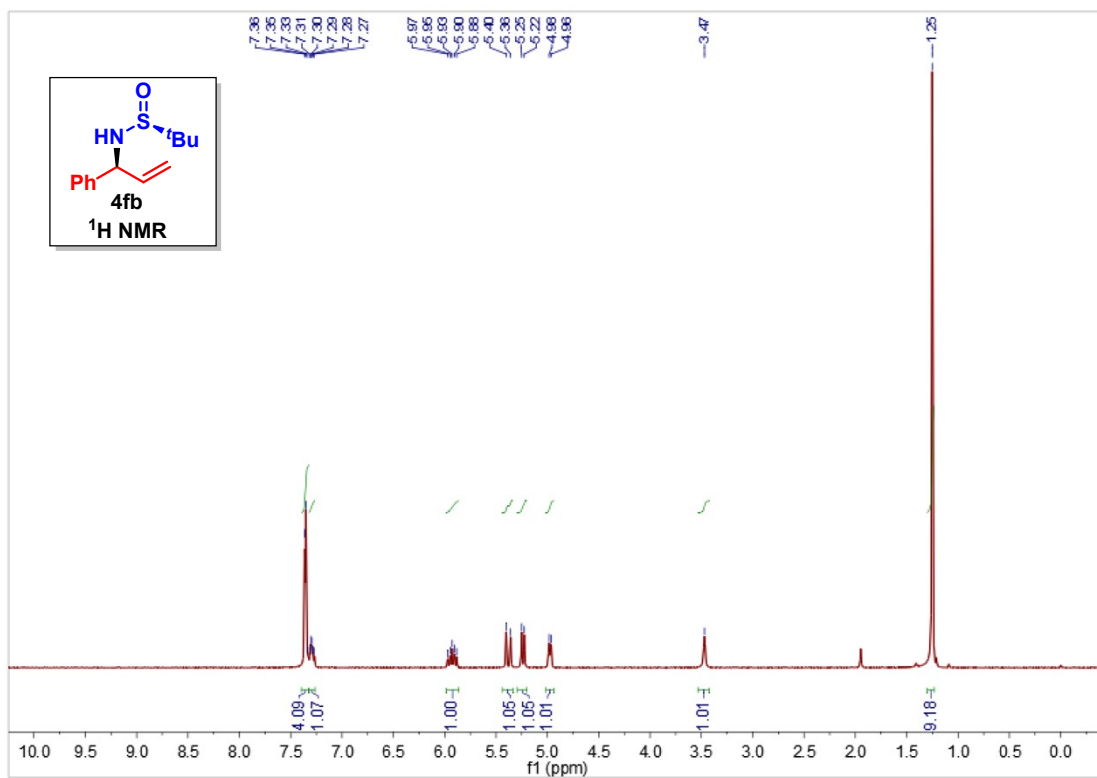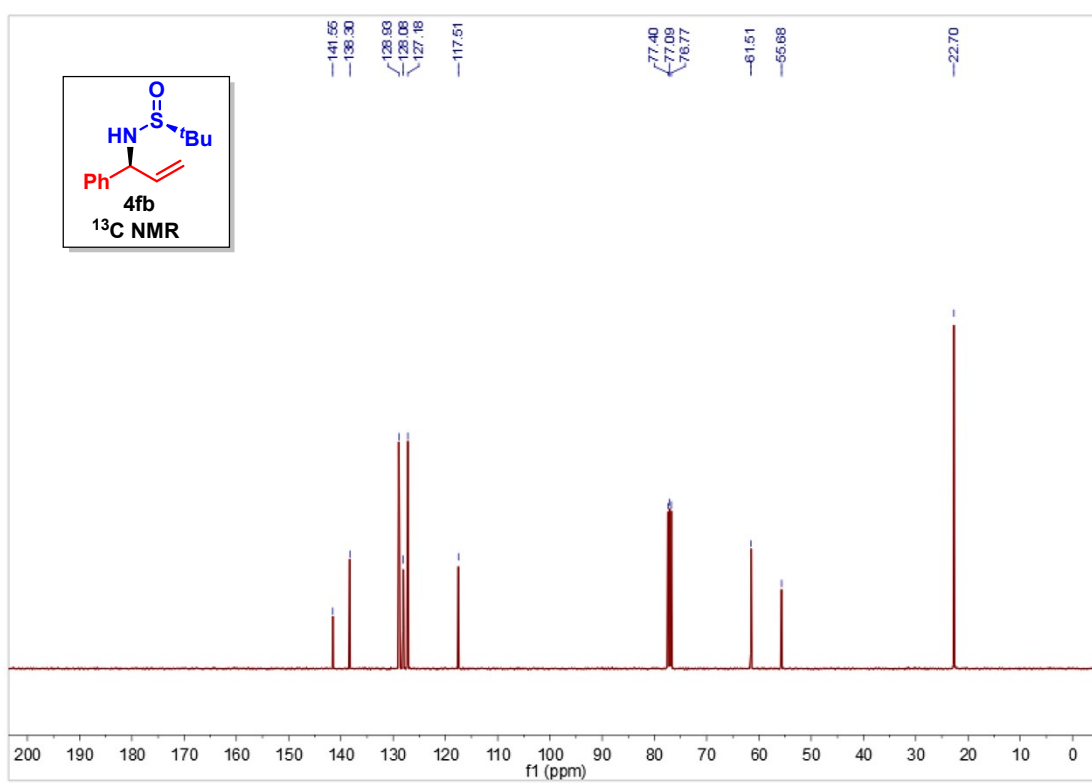

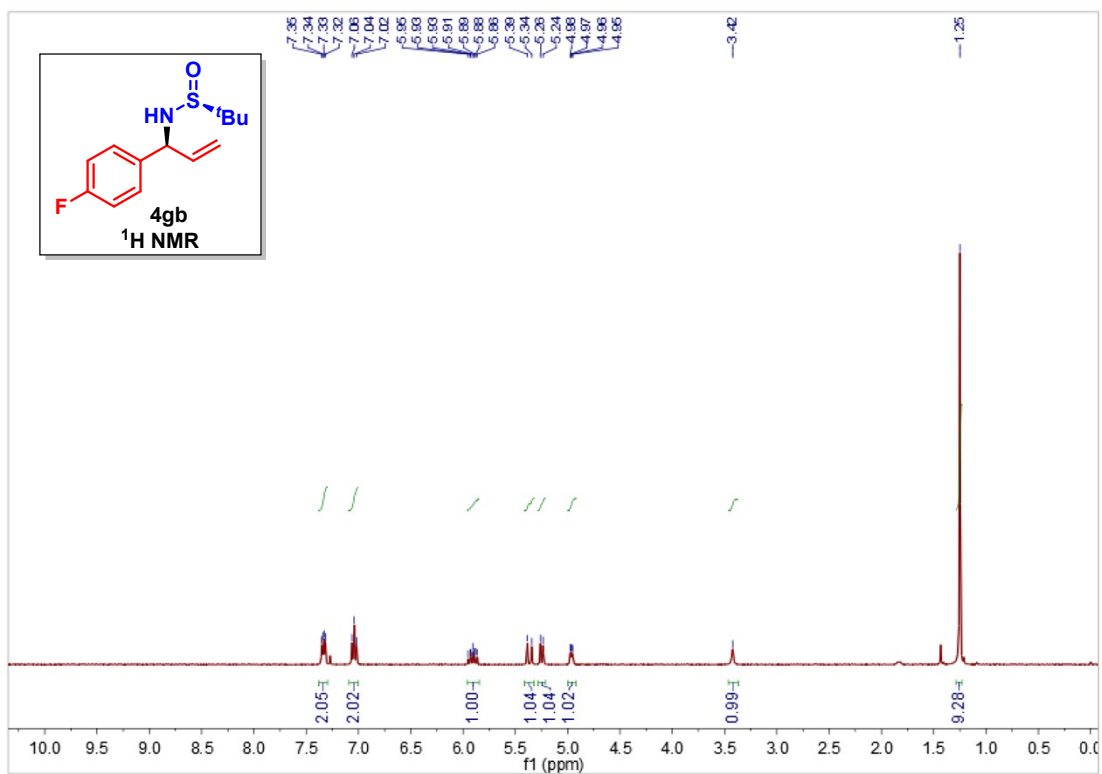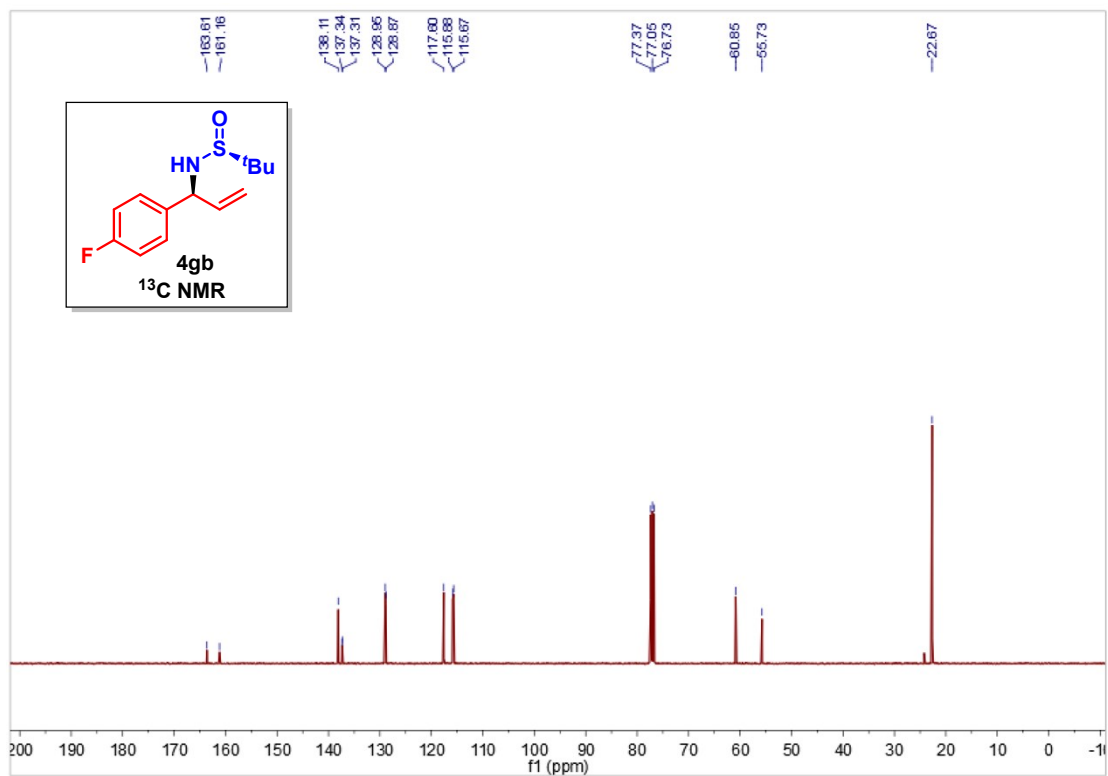

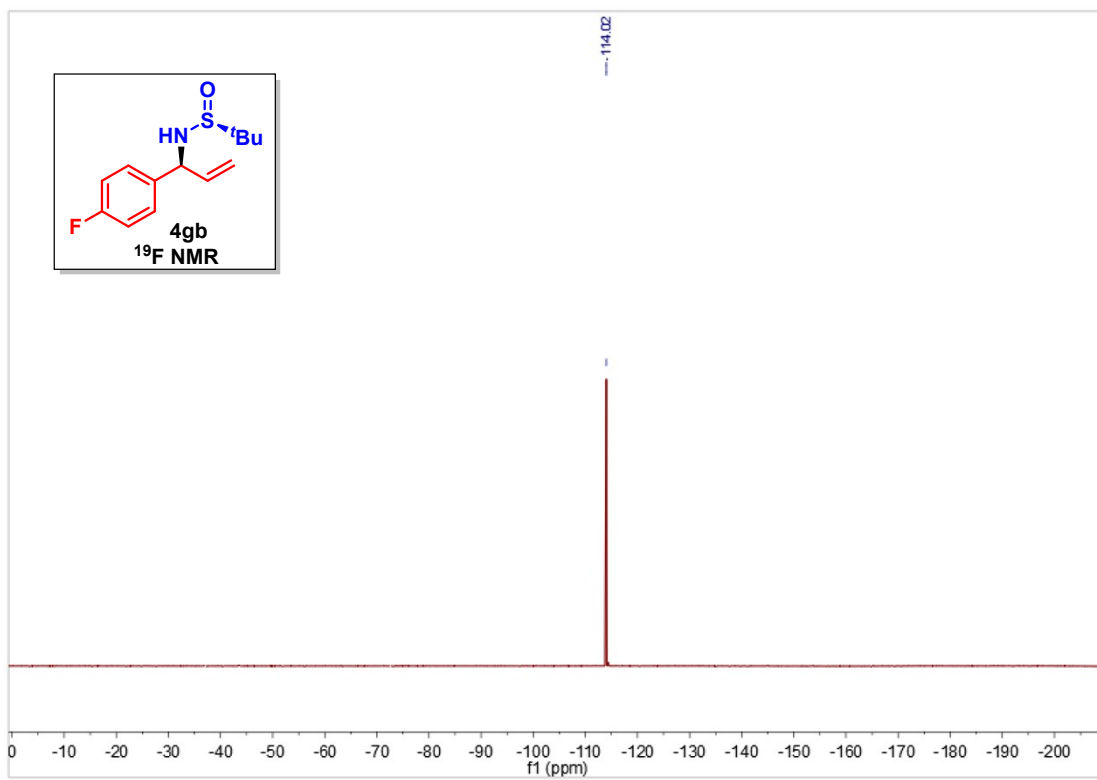

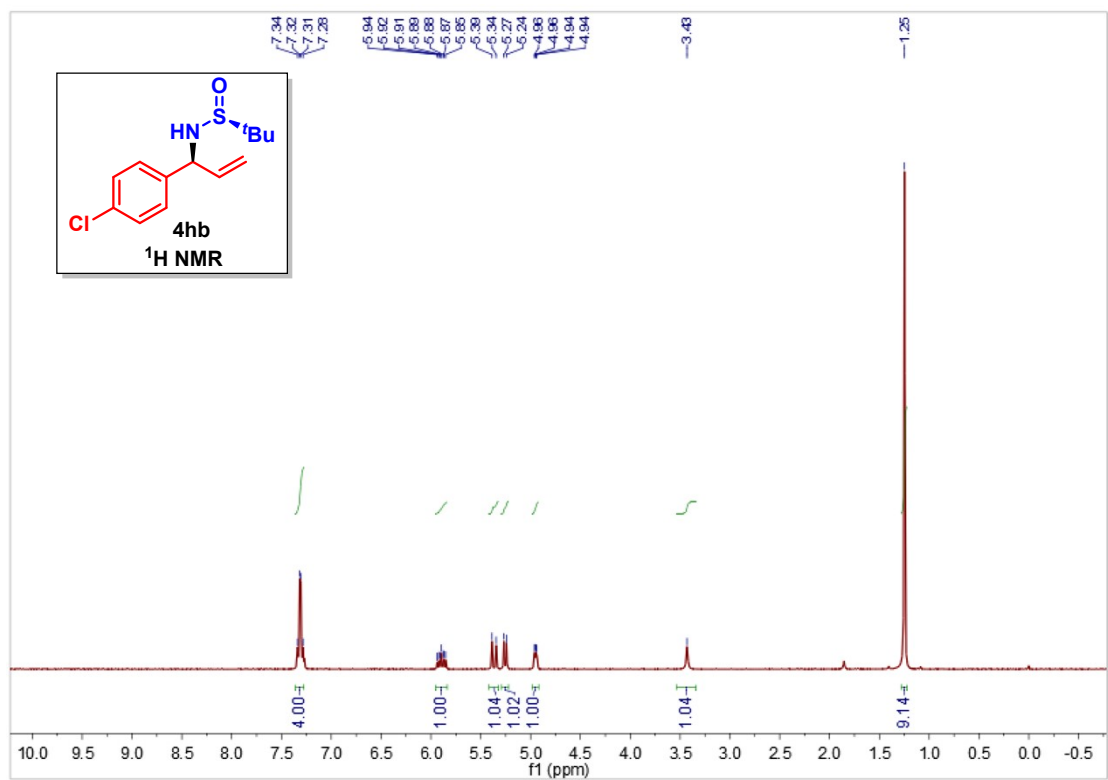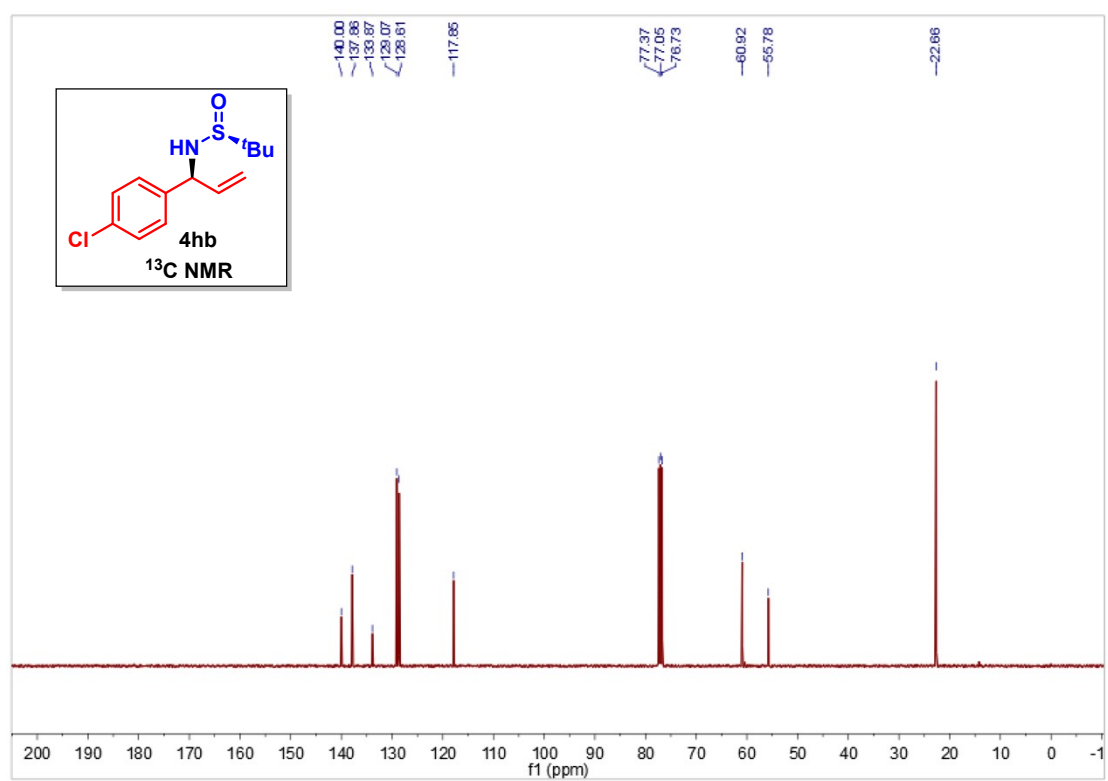

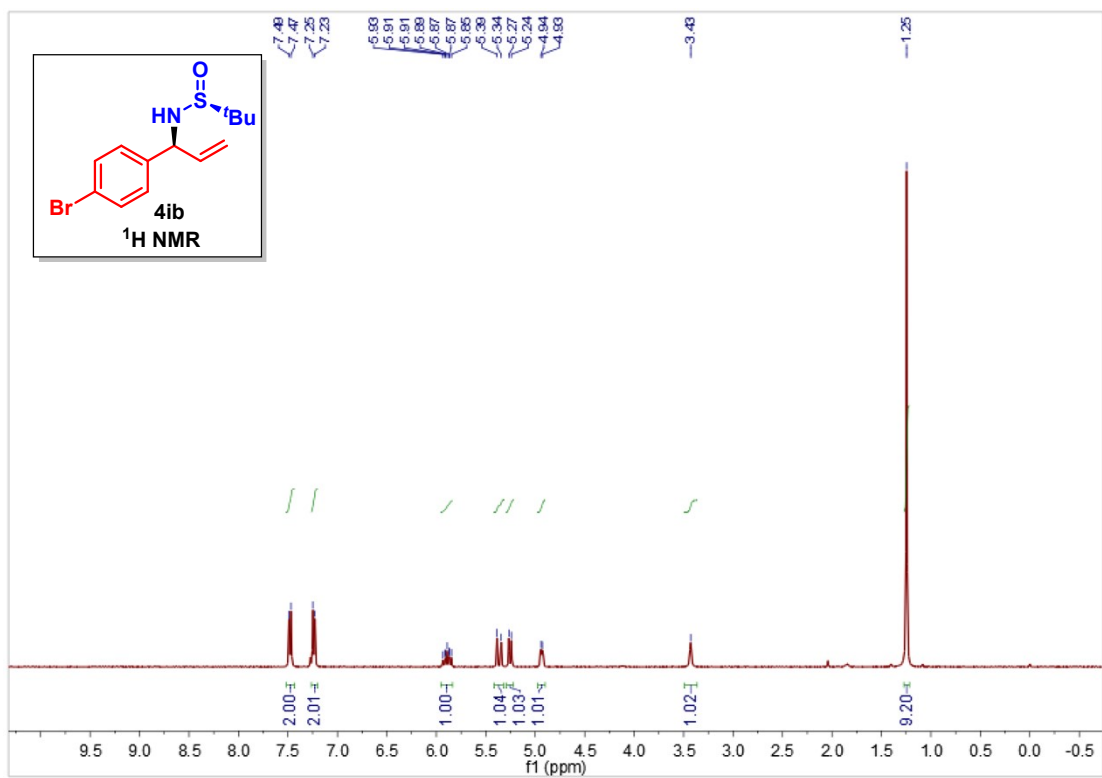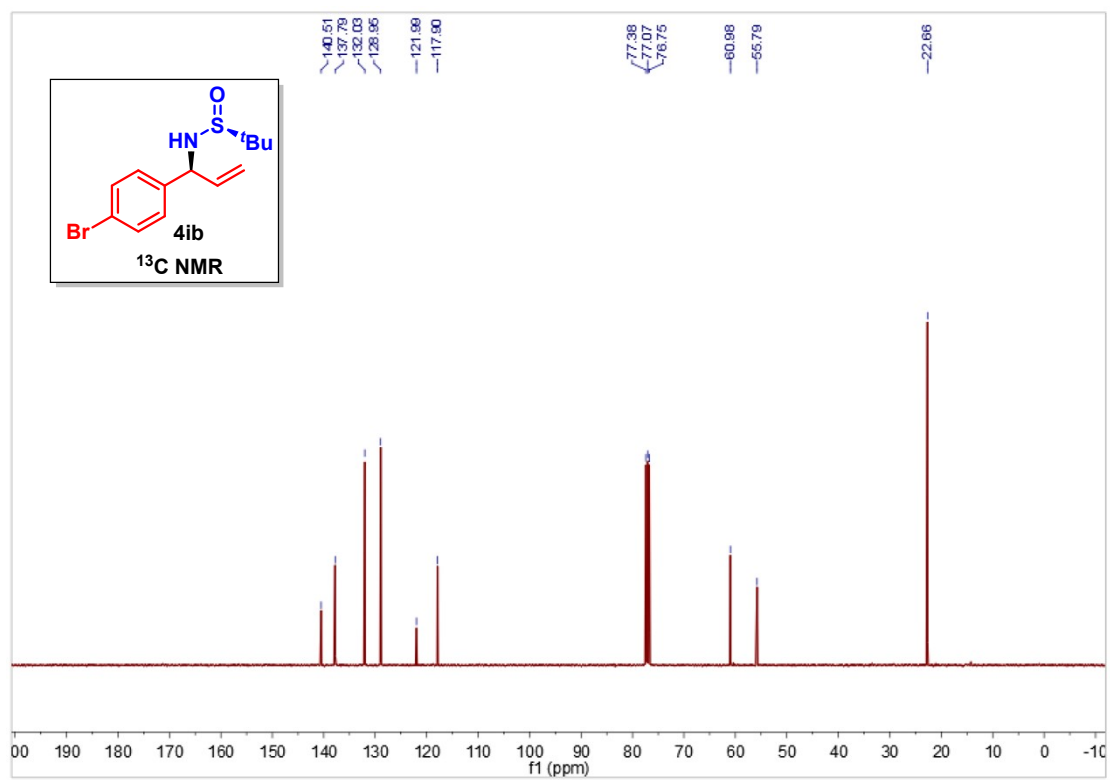

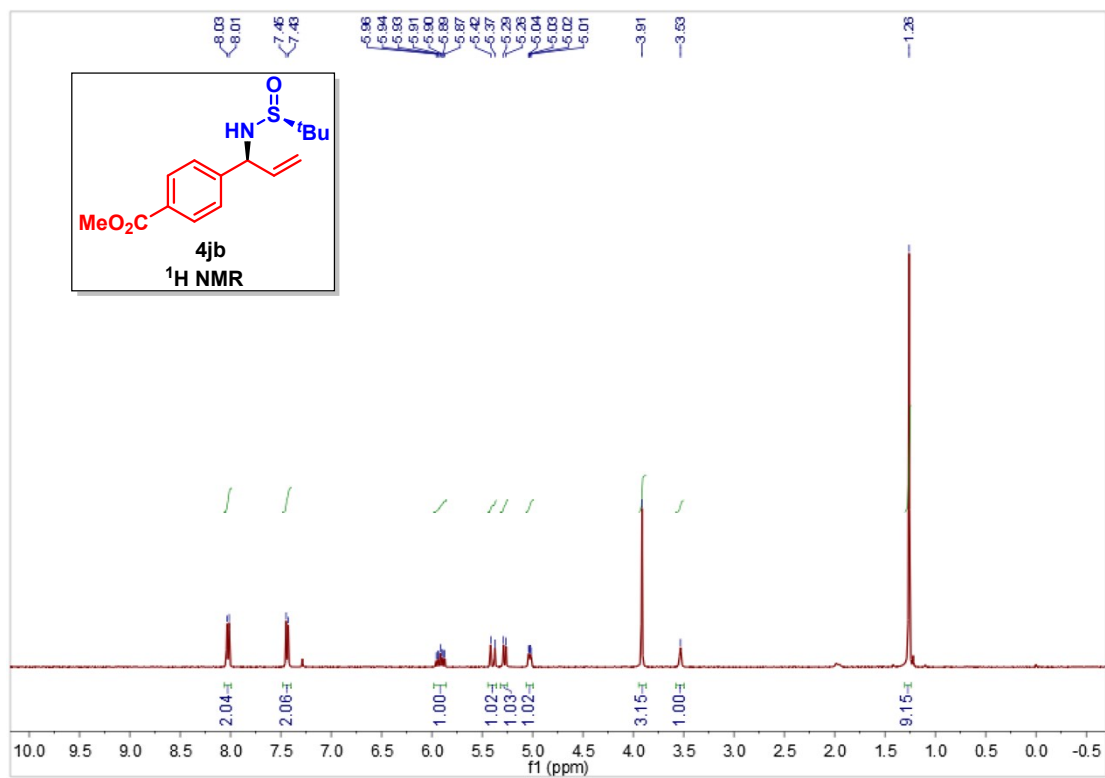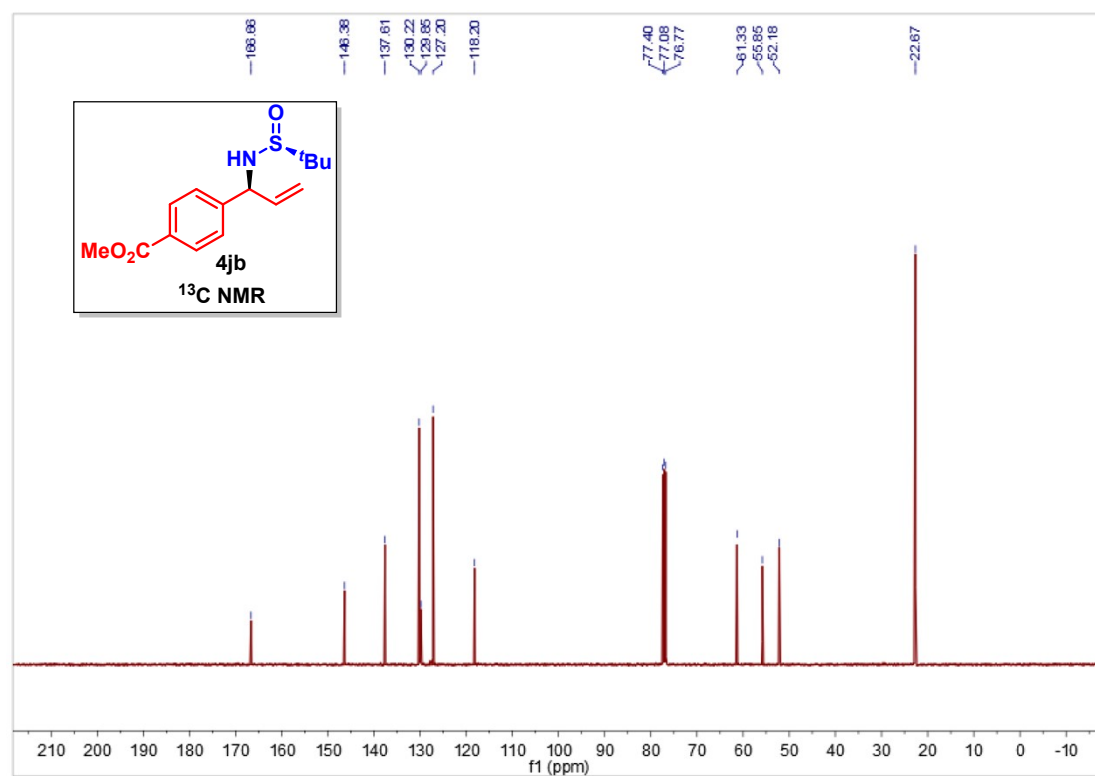

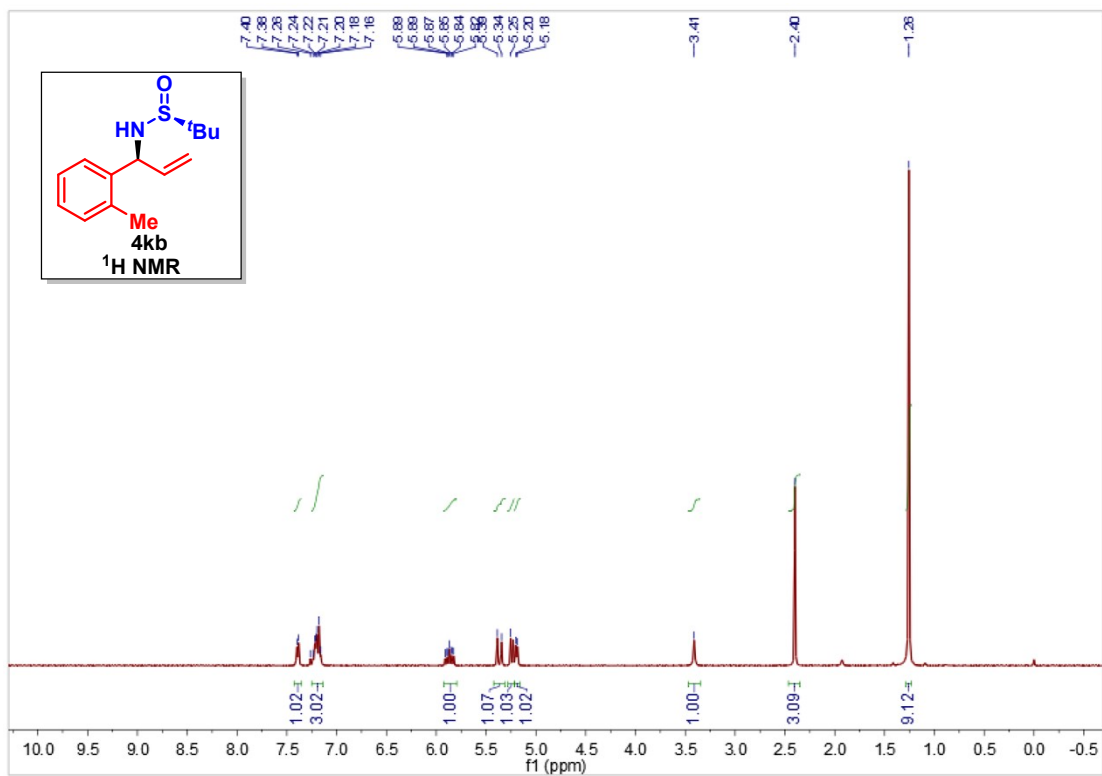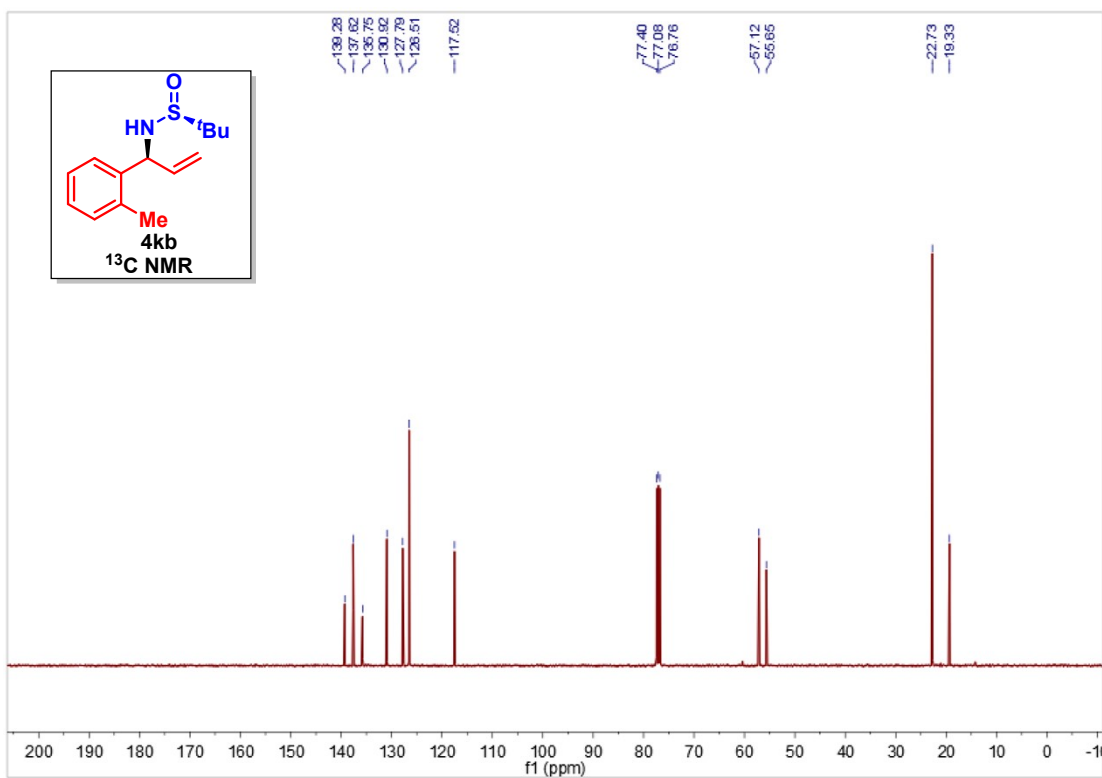



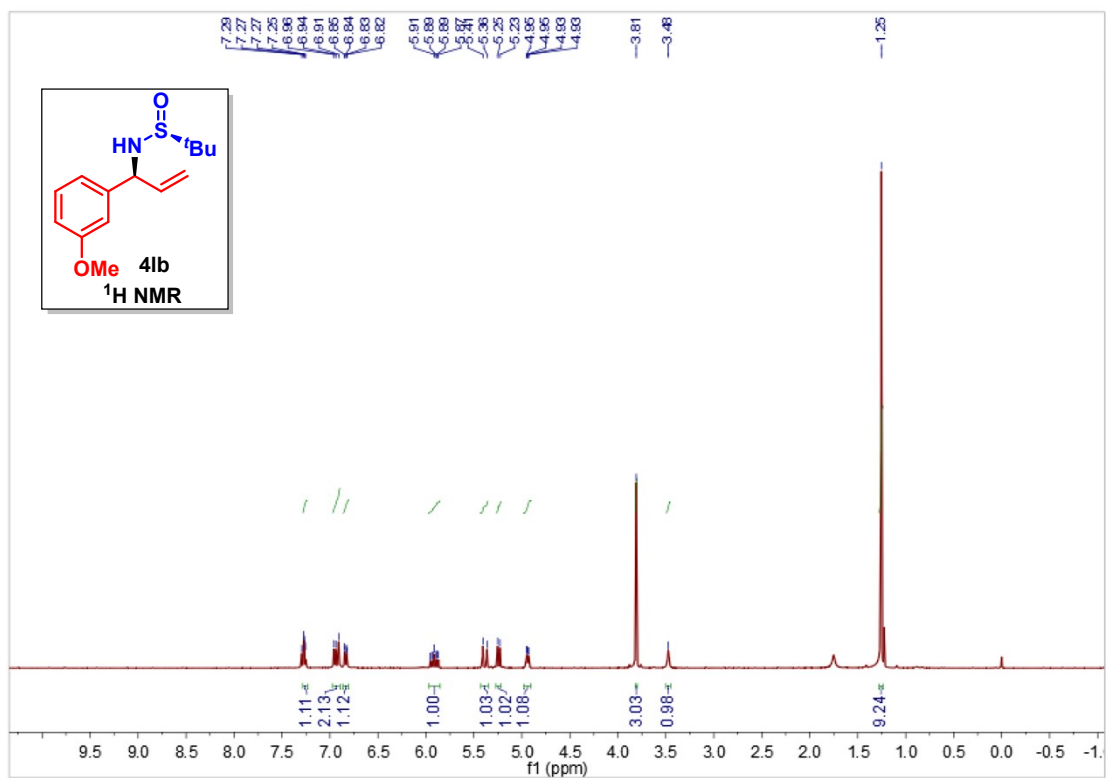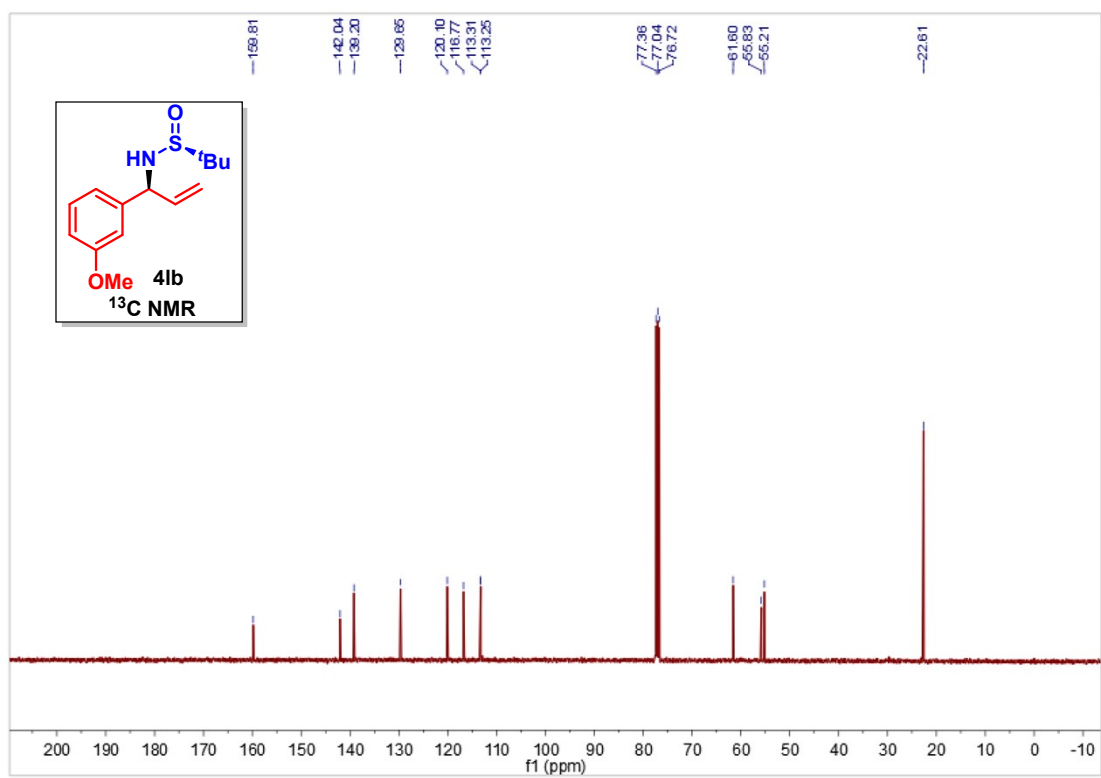

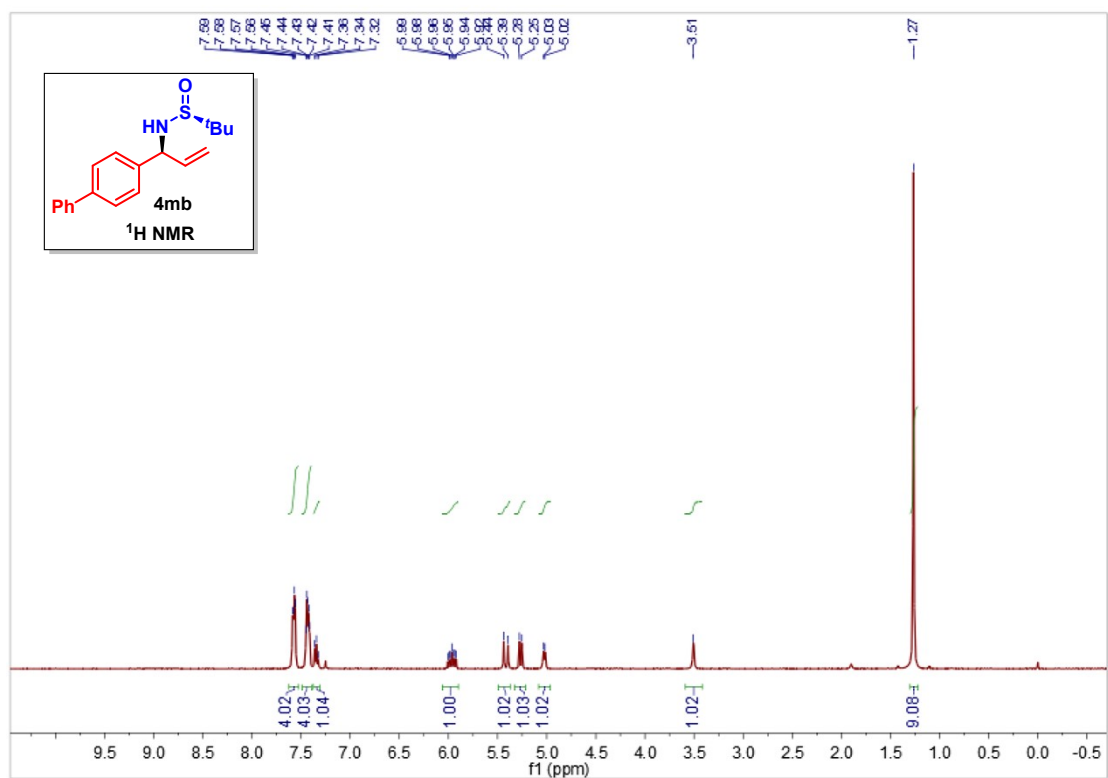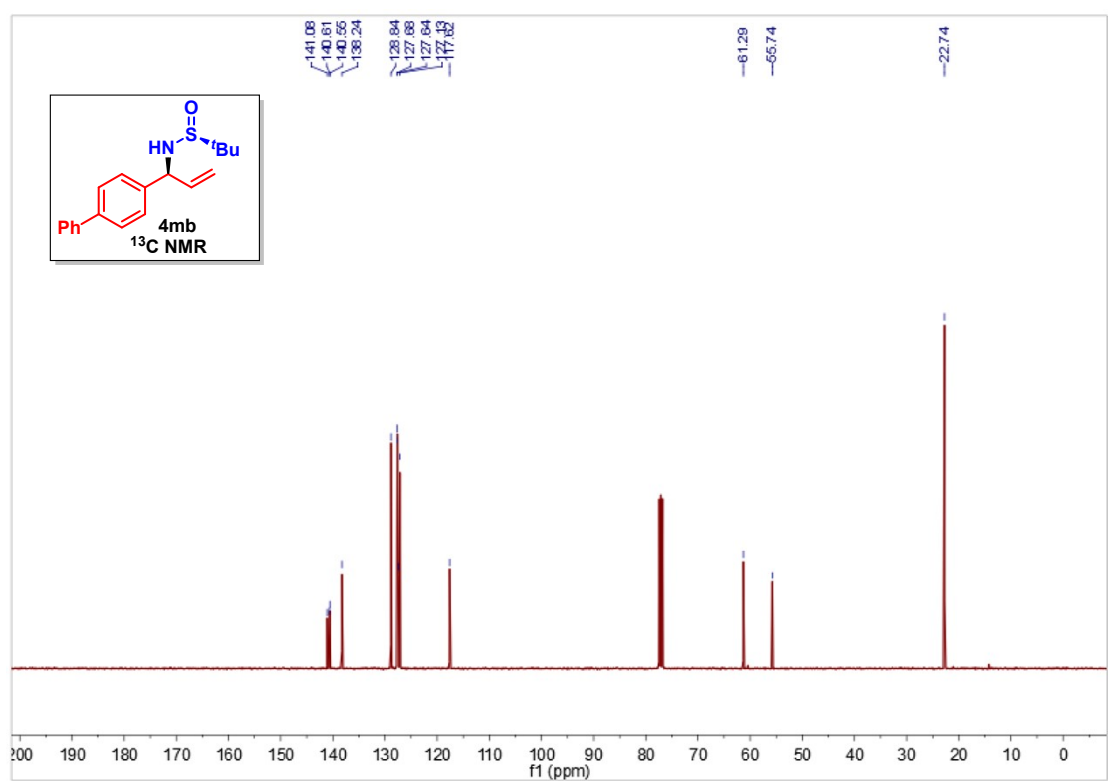

## 12. References.

1. M. Sun, M. Liu and C. Li, Rhodium-Catalyzed Chemodivergent Regio- and Enantioselective Allylic Alkylation of Indoles, *Chem. Eur. J.*, **2021**, *27*, 3457-3462.
2. M. Sun, L. Wei and C. Li, Regio- and Enantioselective Allylic Cyanomethylation by Synergistic Rhodium and Silane Catalysis, *J. Am. Chem. Soc.*, **2023**, *145*, 3897-3902.
3. C. R. Davis, I. K. Luvage and J. M. Ready, Enantioselective Allylation of Alkenyl Boronates Promotes a 1,2-Metalate Rearrangement with 1,3-Diastereocontrol, *J. Am. Chem. Soc.*, **2021**, *143*, 4921-4927.
4. S. Ghorai, S. S. Chirke, W.-B. Xu, J.-F. Chen and C. Li, Cobalt-Catalyzed Regio- and Enantioselective Allylic Amination, *J. Am. Chem. Soc.*, **2019**, *141*, 11430-11434.
5. W.-Y. Qi, T.-S. Zhu and M.-H. Xu, Design of Chiral Sulfoxide Olefins as a New Class of Sulfur-Based Olefin Ligands for Asymmetric Catalysis, *Org. Lett.*, **2011**, *13*, 3410-3413.
